# Supplementary material for: Dynamic kinetic resolution of α-F-β-ketone amides (esters) via Ir/f-diaphos-catalyzed asymmetric hydrogenation
Source: Royal Society of Chemistry journal article supplement (doi:10.1039/d4qo00125g), 2024-01-01
Supplement: d4qo00125g1.pdf [file d4qo00125g1.pdf]

## *Supporting Information*

# **Dynamic Kinetic Resolution of $\alpha$ -F- $\beta$ -Ketone Amides (Esters) via Ir/*f*-Diaphos Catalyzed Asymmetric Hydrogenation**

Pengtao Yang,<sup>#</sup> Dingguo Song,<sup>#</sup> Lingxin Chen, Xianghua Zhao, Yirui Chen, Feiyang Shen, Fei Ling\* and Weihui Zhong\*

College of Pharmaceutical Sciences, Zhejiang University of Technology, Hangzhou  
310014, P. R. China.

### **Table of Contents**

|   |                                                                                                    |     |
|---|----------------------------------------------------------------------------------------------------|-----|
| 1 | General experimental information                                                                   | S1  |
| 2 | General procedure for the preparation of ligands                                                   | S1  |
| 3 | General procedure for the preparation of substrates                                                | S1  |
| 4 | General procedure for the asymmetric hydrogenation of $\alpha$ -F- $\beta$ -ketone amides (Esters) | S2  |
| 5 | General procedure for gram-scale reaction and Further transformations                              | S14 |
| 6 | Determination of the absolute configuration                                                        | S16 |
| 7 | References                                                                                         | S17 |
| 8 | Copies of NMR spectra                                                                              | S18 |
| 9 | Copies of HPLC chart                                                                               | S64 |

## 1. General experimental information

All reactions were performed in an argon-filled glovebox. Anhydrous EA and toluene were distilled from sodium benzophenoneketyl. Anhydrous MeOH, EtOH and *i*PrOH were freshly distilled from magnesium. Hydrogen gas (99.999%), [Ir(COD)Cl]<sub>2</sub> and other chemical reagents were purchased from commercial suppliers. <sup>1</sup>H NMR (400 or 600 MHz), <sup>13</sup>C NMR (100 or 151 MHz) and <sup>19</sup>F NMR (376 or 565 MHz) spectra were recorded on a Bruker ADVANCE III instruments in CDCl<sub>3</sub> with TMS as internal standard. <sup>1</sup>H NMR chemical shifts were referenced to Deuterium chloroform signal (7.26 ppm), <sup>13</sup>C NMR chemical shifts were referenced to the solvent resonance (77.00 ppm, CDCl<sub>3</sub>). Optical rotations were determined using an AUTOPOL V polarimeter. HPLC analysis were performed using Agilent 1100 or Waters e2695 equipped with ID-H, OD-H, AD-H and IJ-H. HRMS spectra were recorded on an Agilent 1200HPLC-6210TOFMS using ESI as ion source. The conversion of starting materials was monitored by thin layer chromatography (TLC) using silica gel plates (silica gel 60 F254 0.25 mm), and components were visualized by observation under UV light (254 and 365 nm).

## 2. General procedure for the preparation of ligands

Ligand **1-6** were prepared according to a procedure reported in our previous papers.<sup>1-5</sup>

## 3. General procedure for the preparation of substrates

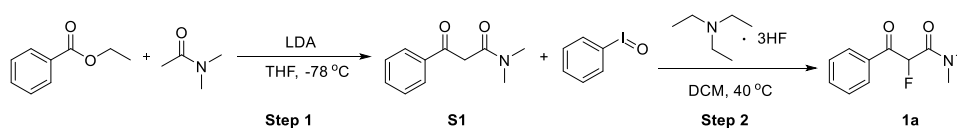

**Step 1**<sup>6</sup>: To a dried three-necked flask equipped with a dropping funnel, a condenser, and a magnetic stirrer, DMAc (20 mmol) and THF (20 ml) were added under N<sub>2</sub> atmosphere. The mixture was cooled to -78 °C. A solution of LDA (40 mmol) in THF (10 mL) was added dropwise from the dropping funnel over 0.5 h and the reaction mixture stirred for another 0.5 h. Ethyl benzoate (23 mmol) was then added and the reaction mixture stirred for a further 0.5 h. The reaction mixture was poured onto saturated aqueous NH<sub>4</sub>Cl and extracted with dichloromethane (3×15 mL). The combined organic extracts were washed with brine, dried over Na<sub>2</sub>SO<sub>4</sub> and the solvent removed in vacuo. The residue was purified by flash column chromatography over silica to give the corresponding key intermediates **S1** in 55-86% yield.

**Step 2<sup>7</sup>:** To a dried flask equipped with a magnetic stirrer, Iodosyl benzene (2.7 mmol), Et<sub>3</sub>N·3HF (18 mmol) and DCM (6 ml) were added. The mixture was stirred at room temperature for 20 minutes. **S1** (2 mmol) was added and the reaction mixture stirred for another 0.5 h. The mixture was heated to 40 °C for 10 h. The reaction mixture was poured onto saturated aqueous NaHCO<sub>3</sub> and extracted with dichloromethane (3 × 15 mL). The combined organic extracts were washed with brine, dried over Na<sub>2</sub>SO<sub>4</sub> and the solvent removed in vacuo. The residue was purified by flash column chromatography over silica to give the corresponding  $\alpha$ -F- $\beta$ -ketone amides (Esters) **1a-3h** in 68-95% yield.

#### 4. General procedure for the asymmetric hydrogenation of $\alpha$ -F- $\beta$ -ketone amides (Esters)

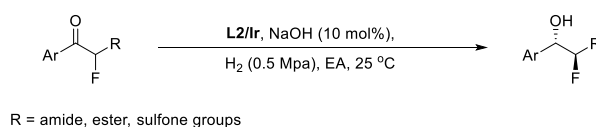

**General procedure for the Preparation procedure of Ir-L2 catalyst:** Under argon atmosphere, [Ir(COD)Cl]<sub>2</sub> (1.68 mg, 0.0025 mmol), **L2** (3.48 mg, 0.0055 mmol), and anhydrous *i*PrOH (2 mL) were added to an oven-dried vial (10 mL) and then stirred at 40 °C for 1.0 h to give a clear yellow solution. The mixture was concentrated to dryness, then 2 mL of dried ethyl acetate or Toluene was added to the crude **Ir-L2** complex.

**General procedure for the asymmetric hydrogenation of  $\alpha$ -F- $\beta$ -ketone amides:** An aliquot of the catalyst solution (0.4 mL, 0.001 mmol) was transferred into a 10 mL hydrogenation vessel, and then substrates (1.0 mmol), NaOH (4.0 mg, 0.10 mmol, in EA) and anhydrous ethyl acetate were added. The vial was placed in an alloy plate which was then placed into the autoclave. And the autoclave was purged five times with argon atmosphere and hydrogen, then pressurized to 5 atm of H<sub>2</sub> and stirred at 25°C for 16 h. Upon completion, the reaction mixture was cooled to room temperature. After the hydrogen pressure was slowly released, the solvent was removed, and the mixture was purified by passing through a short column of silica gel to afford the corresponding products. The ee values of all compounds were determined by HPLC with a chiral column.

**General procedure for the asymmetric hydrogenation of  $\alpha$ -F- $\beta$ -ketone Esters:** An aliquot of the catalyst solution (0.4 mL, 0.001 mmol) was transferred into a 10 mL hydrogenation vessel, and then substrates (1.0 mmol), NaOH (4.0 mg, 0.10 mmol, in Toluene) and anhydrous Toluene (2 mL) were added. The vial was placed in an alloy plate which was then placed into the autoclave. And the autoclave was purged five times with argon atmosphere and hydrogen, then pressurized to 10 atm of H<sub>2</sub> and stirred at 40 °C for 24 h. Upon completion, the reaction mixture was cooled to room temperature. After the hydrogen pressure was slowly released, the solvent was removed, and the mixture was purified by passing through a short column of silica gel to afford

the corresponding products. The ee values of all compounds were determined by HPLC with a chiral column.

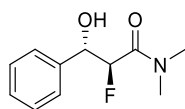

**(2S,3S)-2-fluoro-3-hydroxy-N,N-dimethyl-3-phenylpropanamide (2a):**

White solid, 99% yield, >99% ee, 97/3 dr, m.p. 67.4 - 70.6 °C;  $[\alpha]_D^{20} = +372.0$  (c = 0.1, CH<sub>2</sub>Cl<sub>2</sub>). The ee was determined by HPLC on Chiralpak ID-H column, hexane: isopropanol = 90:10; flow rate = 1 mL/min; column temperature 25 °C; UV detection at 220 nm;  $t_{R1} = 25.99$  min (major),  $t_{R2} = 28.31$  min (minor),  $t_{R3} = 33.94$  min (minor),  $t_{R4} = 35.06$  min (minor). <sup>1</sup>H NMR (400 MHz, CDCl<sub>3</sub>) δ 7.43 (d, *J* = 7.2 Hz, 2H), 7.39 - 7.33 (m, 3H), 5.11 (t, *J* = 7.2 Hz, 1H), 4.97 (dd, *J* = 46.0, 7.2 Hz, 1H), 4.28 (s, 1H), 2.98 (s, 3H), 2.94 (s, 3H). <sup>13</sup>C NMR (100 MHz, CDCl<sub>3</sub>) δ 168.0 (d, *J* = 19.8 Hz), 128.5, 128.4, 127.0 (d, *J* = 1.3 Hz), 88.5 (d, *J* = 185.0 Hz), 72.8 (d, *J* = 24.2 Hz), 36.9 (d, *J* = 5.8 Hz), 35.9. <sup>19</sup>F NMR (376 MHz, CDCl<sub>3</sub>) δ -187.12. HRMS (ESI) calcd for C<sub>16</sub>H<sub>18</sub>BrO<sub>3</sub>S [M+H]<sup>+</sup>: 211.1009, found: 211.1005.

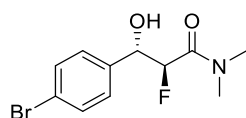

**(2S,3S)-3-(4-bromophenyl)-2-fluoro-3-hydroxy-N,N-dimethylpropanamide (2b):**

White solid, 98% yield, 99% ee, 97/3 dr, m.p. 131.5-133.6 °C;  $[\alpha]_D^{20} = +62.0$  (c = 0.1, CH<sub>2</sub>Cl<sub>2</sub>). The ee was determined by HPLC on Chiralpak IJ-H column, hexane: isopropanol = 90:10; flow rate = 1 mL/min; column temperature 25 °C; UV detection at 220 nm;  $t_{R1} = 11.22$  min (minor),  $t_{R2} = 12.33$  min (major),  $t_{R3} = 14.25$  min (minor),  $t_{R4} = 16.21$  min (minor). <sup>1</sup>H NMR (400 MHz, CDCl<sub>3</sub>) δ 7.51 (d, *J* = 8.4 Hz, 2H), 7.32 (d, *J* = 8.4 Hz, 2H), 5.08 (t, *J* = 8.0, 1H), 4.87 (dd, *J* = 46.0, 7.6 Hz, 1H), 4.13 (s, 1H), 3.01 (s, 6H). <sup>13</sup>C NMR (100 MHz, CDCl<sub>3</sub>) δ 167.9 (d, *J* = 19.6 Hz), 138.0, 131.6, 128.8 (d, *J* = 1.6 Hz), 122.4, 88.4 (d, *J* = 185.8 Hz), 72.1 (d, *J* = 24.4 Hz), 37.0 (d, *J* = 6.2 Hz), 36.0. <sup>19</sup>F NMR (376 MHz, CDCl<sub>3</sub>) δ -187.01. HRMS (ESI) calcd for C<sub>17</sub>H<sub>20</sub>BrO<sub>3</sub>S [M+H]<sup>+</sup>: 289.0114, found: 289.0112.

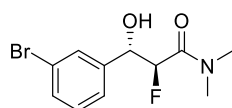

**(2S,3S)-3-(3-bromophenyl)-2-fluoro-3-hydroxy-N,N-dimethylpropanamide (2c):**

Colorless liquid, 95% yield, 99% ee, 93/7 dr;  $[\alpha]_D^{20} = +72.0$  (c = 0.1, CH<sub>2</sub>Cl<sub>2</sub>). The ee was determined by HPLC on Chiralpak ID-H column, hexane: isopropanol = 94:6; flow rate = 1 mL/min; column temperature 25 °C; UV detection at 220 nm;  $t_{R1} = 20.23$  min

(major),  $t_{R2} = 31.81$  min (minor),  $t_{R3} = 34.23$  min (minor),  $t_{R4} = 39.17$  min (minor).  $^1\text{H}$  NMR (400 MHz,  $\text{CDCl}_3$ )  $\delta$  7.66 (s, 1H), 7.50 (d,  $J = 8.0$  Hz, 1H), 7.40 (d,  $J = 7.6$  Hz, 1H), 7.29 (d,  $J = 7.6$  Hz, 1H), 5.12 (t,  $J = 6.0$ , 1H), 4.94 (dd,  $J = 46.4, 8.0$  Hz, 1H), 3.05 (s, 6H).  $^{13}\text{C}$  NMR (100 MHz,  $\text{CDCl}_3$ )  $\delta$  167.9 (d,  $J = 19.7$  Hz), 141.3, 131.5, 130.1, 130.0, 125.9 (d,  $J = 1.7$  Hz), 122.6, 88.4 (d,  $J = 185.9$  Hz), 72.0 (d,  $J = 24.4$  Hz), 37.0 (d,  $J = 6.0$  Hz), 36.0.  $^{19}\text{F}$  NMR (376 MHz,  $\text{CDCl}_3$ )  $\delta$  -187.12. HRMS (ESI) calcd for  $\text{C}_{20}\text{H}_{26}\text{BrO}_3\text{S}$   $[\text{M}+\text{H}]^+$ : 289.0114, found: 289.0113.

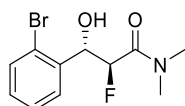

**(2S,3S)-3-(2-bromophenyl)-2-fluoro-3-hydroxy-N,N-dimethylpropanamide (2d):**

White solid, 80% yield, 10% *ee*, 40/60 *dr*, m.p. 75.0-78.0 °C;  $[\alpha]_{\text{D}}^{20} = +16.0$  ( $c = 0.1$ ,  $\text{CH}_2\text{Cl}_2$ ). The *ee* was determined by HPLC on Chiralpak ID-H column, hexane: isopropanol = 90:10; flow rate = 1 mL/min; column temperature 25 °C; UV detection at 220 nm;  $t_{R1} = 19.03$  min (minor),  $t_{R2} = 23.69$  min (minor),  $t_{R3} = 26.20$  min (major),  $t_{R4} = 32.15$  min (minor).  $^1\text{H}$  NMR (400 MHz,  $\text{CDCl}_3$ )  $\delta$  7.56 (dd,  $J = 12.4, 8.0$  Hz, 2H), 7.37 (t,  $J = 7.6$  Hz, 1H), 7.19 (t,  $J = 8.0$  Hz, 1H), 5.58 (t,  $J = 7.6$  Hz, 1H), 5.28 (dd,  $J = 45.2, 4.8$  Hz, 1H), 4.76 (d,  $J = 5.6$  Hz, 1H), 2.92 (s, 4H), 2.81 (s, 6H).  $^{13}\text{C}$  NMR (100 MHz,  $\text{CDCl}_3$ )  $\delta$  167.5 (d,  $J = 20.3$  Hz), 137.7 (d,  $J = 5.1$  Hz), 132.8, 129.9, 128.8, 127.9, 123.0, 86.5 (d,  $J = 185.8$  Hz), 72.6 (d,  $J = 24.2$  Hz), 36.8 (d,  $J = 4.6$  Hz), 35.8.  $^{19}\text{F}$  NMR (376 MHz,  $\text{CDCl}_3$ )  $\delta$  -187.52. HRMS (ESI) calcd for  $\text{C}_{16}\text{H}_{17}\text{BrNO}_5\text{S}$   $[\text{M}+\text{H}]^+$ : 289.0114, found: 289.0111.

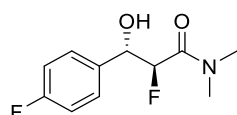

**(2S,3S)-2-fluoro-3-(4-fluorophenyl)-3-hydroxy-N,N-dimethylpropanamide (2e):**

White solid, 99% yield, 97% *ee*, 99/1 *dr*, m.p. 113.3-116.3 °C;  $[\alpha]_{\text{D}}^{20} = +48.0$  ( $c = 0.1$ ,  $\text{CH}_2\text{Cl}_2$ ). The *ee* was determined by HPLC on Chiralpak OD-H column, hexane: isopropanol = 96:4; flow rate = 1 mL/min; column temperature 25 °C; UV detection at 220 nm;  $t_{R1} = 18.37$  min (minor),  $t_{R2} = 24.78$  min (minor),  $t_{R3} = 29.01$  min (major),  $t_{R4} = 47.61$  min (minor).  $^1\text{H}$  NMR (400 MHz,  $\text{CDCl}_3$ )  $\delta$  7.42 (m, 2H), 7.07 (t,  $J = 8.8$  Hz, 2H), 5.09 (t,  $J = 7.2$  Hz, 1H), 4.88 (dd,  $J = 46.4, 8.0$  Hz, 1H), 4.21 (s, 1H), 3.01 (s, 6H).  $^{13}\text{C}$  NMR (100 MHz,  $\text{CDCl}_3$ )  $\delta$  168.0 (d,  $J = 19.5$  Hz), 164.1, 161.6, 134.7, 134.7 (d,  $J = 1.2$  Hz), 128.9 (d,  $J = 1.6$  Hz), 128.8 (d,  $J = 1.4$  Hz), 115.4 (d,  $J = 21.4$  Hz), 88.6 (d,  $J = 185.6$  Hz), 72.1 (d,  $J = 24.4$  Hz), 37.0 (d,  $J = 6.3$  Hz), 36.0.  $^{19}\text{F}$  NMR (376 MHz,  $\text{CDCl}_3$ )  $\delta$  -113.96, -186.98. HRMS (ESI) calcd for  $\text{C}_{16}\text{H}_{17}\text{BrFO}_3\text{S}$   $[\text{M}+\text{H}]^+$ : 229.0914, found: 229.0911.

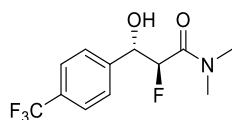

**(2S,3S)-2-fluoro-3-hydroxy-N,N-dimethyl-3-(4-(trifluoromethyl)phenyl)propanamide (2f):**

White solid, 99% yield, 99% *ee*, 96/4 *dr*, m.p. 140.0-143.2 °C;  $[\alpha]_D^{20} = +78.0$  ( $c = 0.1$ ,  $\text{CH}_2\text{Cl}_2$ ). The *ee* was determined by HPLC on Chiralpak ID-H column, hexane: isopropanol = 90:10; flow rate = 1 mL/min; column temperature 25 °C; UV detection at 220 nm;  $t_{R1} = 8.03$  min (minor),  $t_{R2} = 8.86$  min (minor),  $t_{R3} = 12.86$  min (major),  $t_{R4} = 19.35$  min (minor).  $^1\text{H NMR}$  (400 MHz,  $\text{CDCl}_3$ )  $\delta$  7.64 (d,  $J = 8.4$  Hz, 2H), 7.57 (d,  $J = 8.4$  Hz, 2H), 5.17 (t,  $J = 6.4$  Hz, 1H), 4.89 (dd,  $J = 46.4, 8.0$  Hz, 1H), 4.38 (s, 1H), 3.01 (s, 6H).  $^{13}\text{C NMR}$  (100 MHz,  $\text{CDCl}_3$ )  $\delta$  167.5 (d,  $J = 19.5$  Hz), 142.7, 130.4, 130.1, 127.2 (d,  $J = 1.7$  Hz), 125.2, 125.1 (q,  $J = 3.7$  Hz), 122.5, 88.1 (d,  $J = 186.2$  Hz), 71.7 (d,  $J = 24.2$  Hz), 36.7 (d,  $J = 6.2$  Hz), 35.7.  $^{19}\text{F NMR}$  (376 MHz,  $\text{CDCl}_3$ )  $\delta$  -62.57, -187.21. HRMS (ESI) calcd for  $\text{C}_{17}\text{H}_{17}\text{BrF}_3\text{O}_3\text{S}$   $[\text{M}+\text{H}]^+$ : 279.0882, found: 279.0884.

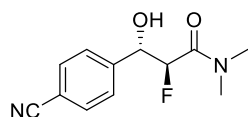

**(2S,3S)-3-(4-cyanophenyl)-2-fluoro-3-hydroxy-N,N-dimethylpropanamide (2g):**

Colorless liquid, 92% yield, 98% *ee*, 95/5 *dr*;  $[\alpha]_D^{20} = +36.0$  ( $c = 0.1$ ,  $\text{CH}_2\text{Cl}_2$ ). The *ee* was determined by HPLC on Chiralpak OD-H column, hexane: isopropanol = 90:10; flow rate = 1 mL/min; column temperature 25 °C; UV detection at 220 nm;  $t_{R1} = 43.16$  min (minor),  $t_{R2} = 47.60$  min (minor),  $t_{R3} = 63.71$  min (major),  $t_{R4} = 95.60$  min (minor).  $^1\text{H NMR}$  (600 MHz, Chloroform-d)  $\delta$  7.70 (d,  $J = 8.4$  Hz, 1H), 7.60 (d,  $J = 8.4$  Hz, 1H), 5.181 (t,  $J = 7.8$ , 1H), 4.86 (dd,  $J = 46.2, 8.4$  Hz, 1H), 4.36 (s, 1H), 3.07 (s, 3H), 3.05 (s, 3H).  $^{13}\text{C NMR}$  (151 MHz, Chloroform-d)  $\delta$  167.6 (d,  $J = 19.5$  Hz), 144.3, 132.2, 127.9 (d,  $J = 2.0$  Hz), 118.9, 112.2, 88.3 (d,  $J = 188.3$  Hz), 71.9 (d,  $J = 24.3$  Hz), 37.1 (d,  $J = 6.5$  Hz), 36.1.  $^{19}\text{F NMR}$  (565 MHz, Chloroform-d)  $\delta$  -187.16. HRMS (ESI) calcd for  $\text{C}_{17}\text{H}_{21}\text{O}_4\text{S}$   $[\text{M}+\text{H}]^+$ : 236.0961, found: 236.0965.

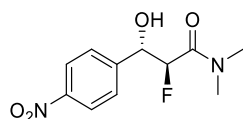

**(2S,3S)-2-fluoro-3-hydroxy-N,N-dimethyl-3-(4-nitrophenyl)propanamide (2h):**

White solid, 90% yield, 96% *ee*, 90/10 *dr*, m.p. 132.2-135.1 °C;  $[\alpha]_D^{20} = +96.0$  ( $c = 0.1$ ,  $\text{CH}_2\text{Cl}_2$ ). The *ee* was determined by HPLC on Chiralpak OD-H column, hexane: isopropanol = 93:7; flow rate = 1 mL/min; column temperature 25 °C; UV detection at 220 nm;  $t_{R1} = 56.05$  min (minor),  $t_{R2} = 70.50$  min (minor),  $t_{R3} = 100.66$  min (major),  $t_{R4} = 166.4$  min (minor).  $^1\text{H NMR}$  (600 MHz, Chloroform-d)  $\delta$  8.23 (d,  $J = 8.4$  Hz, 2H),

7.64 (d,  $J = 8.4$  Hz, 2H), 5.22 (t,  $J = 7.2$  Hz, 1H), 4.87 (dd,  $J = 46.2, 7.8$  Hz, 1H), 4.46 (s, 1H), 3.03 (s, 6H).  $^{13}\text{C}$  NMR (151 MHz, Chloroform- $d$ )  $\delta$  167.4 (d,  $J = 19.6$  Hz), 147.8, 146.2, 128.0, 123.5, 88.2 (d,  $J = 188.1$  Hz), 71.6 (d,  $J = 24.2$  Hz), 37.0 (d,  $J = 6.3$  Hz), 36.0.  $^{19}\text{F}$  NMR (565 MHz, Chloroform- $d$ )  $\delta$  -187.13. HRMS (ESI) calcd for  $\text{C}_{17}\text{H}_{21}\text{O}_4\text{S}$   $[\text{M}+\text{H}]^+$ : 256.0895, found: 256.0892.

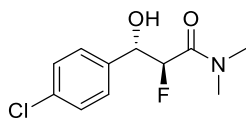

**(2S,3S)-3-(4-chlorophenyl)-2-fluoro-3-hydroxy-N,N-dimethylpropanamide (2i):**

White solid, 95% yield, 99% *ee*, 96/4 *dr*, m.p. 117.5-121.7 °C;  $[\alpha]_{\text{D}}^{20} = +58.0$  ( $c = 0.1$ ,  $\text{CH}_2\text{Cl}_2$ ). The *ee* was determined by HPLC on Chiralpak ID-H column, hexane: isopropanol = 90:10; flow rate = 1 mL/min; column temperature 25 °C; UV detection at 220 nm;  $t_{\text{R}1} = 16.42$  min (major),  $t_{\text{R}2} = 18.52$  min (minor),  $t_{\text{R}3} = 19.56$  min (minor),  $t_{\text{R}4} = 23.82$  min (minor).  $^1\text{H}$  NMR (400 MHz,  $\text{CDCl}_3$ )  $\delta$  7.39 – 7.33 (m, 4H), 5.09 (t,  $J = 6.8$  Hz, 1H), 4.87 (dd,  $J = 46.0, 7.6$  Hz, 1H), 4.28 (s, 1H), 3.00 (s, 6H).  $^{13}\text{C}$  NMR (100 MHz,  $\text{CDCl}_3$ )  $\delta$  167.9 (d,  $J = 19.5$  Hz), 137.5 (d,  $J = 1.4$  Hz), 134.2, 128.7, 128.5 (d,  $J = 1.5$  Hz), 88.5 (d,  $J = 185.7$  Hz), 72.0 (d,  $J = 24.4$  Hz), 37.0 (d,  $J = 6.1$  Hz), 36.0.  $^{19}\text{F}$  NMR (376 MHz,  $\text{CDCl}_3$ )  $\delta$  -187.08. HRMS (ESI) calcd for  $\text{C}_{17}\text{H}_{20}\text{BrO}_3\text{S}$   $[\text{M}+\text{H}]^+$ : 245.0619, found: 245.0613.

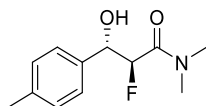

**(2S,3S)-2-fluoro-3-hydroxy-N,N-dimethyl-3-(*p*-tolyl)propanamide (2j):**

White solid, 99% yield, 99% *ee*, 90/10 *dr*, m.p. 88.1-90.5 °C;  $[\alpha]_{\text{D}}^{20} = +52.0$  ( $c = 0.1$ ,  $\text{CH}_2\text{Cl}_2$ ). The *ee* was determined by HPLC on Chiralpak ID-H column, hexane: isopropanol = 90:10; flow rate = 1 mL/min; column temperature 25 °C; UV detection at 220 nm;  $t_{\text{R}1} = 20.27$  min (major),  $t_{\text{R}2} = 24.15$  min (minor),  $t_{\text{R}3} = 26.71$  min (minor),  $t_{\text{R}4} = 32.28$  min (minor).  $^1\text{H}$  NMR (400 MHz,  $\text{CDCl}_3$ )  $\delta$  7.32 (d,  $J = 8.0$  Hz, 2H), 7.19 (d,  $J = 8.0$  Hz, 2H), 5.09 (t,  $J = 7.2$  Hz, 1H), 4.95 (dd,  $J = 46.4, 7.6$  Hz, 1H), 4.13 (s, 1H), 3.00 (s, 3H), 2.97 (s, 3H), 2.35 (s, 3H).  $^{13}\text{C}$  NMR (100 MHz,  $\text{CDCl}_3$ )  $\delta$  168.1 (d,  $J = 19.8$  Hz), 138.2, 135.9 (d,  $J = 1.8$  Hz), 130.3, 129.2, 127.0 (d,  $J = 1.3$  Hz), 88.6 (d,  $J = 184.7$  Hz), 72.7 (d,  $J = 24.9$  Hz), 37.0 (d,  $J = 5.8$  Hz), 36.0, 21.3.  $^{19}\text{F}$  NMR (376 MHz,  $\text{CDCl}_3$ )  $\delta$  -186.87. HRMS (ESI) calcd for  $\text{C}_{16}\text{H}_{17}\text{BrFO}_3\text{S}$   $[\text{M}+\text{H}]^+$ : 225.1165, found: 225.1168.

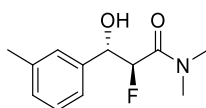

**(2S,3S)-2-fluoro-3-hydroxy-N,N-dimethyl-3-(*m*-tolyl)propanamide (2k):**

Colorless liquid, 99% yield, 98% *ee*, 96/4 *dr*.  $[\alpha]_D^{20} = +74.0$  ( $c = 0.1$ ,  $\text{CH}_2\text{Cl}_2$ ). The *ee* was determined by HPLC on Chiralpak OD-H column, hexane: isopropanol = 90:10; flow rate = 1.0 mL/min; column temperature 25 °C; UV detection at 220 nm;  $t_{R1} = 10.61$  min (minor),  $t_{R2} = 11.43$  min (minor),  $t_{R3} = 13.08$  min (major),  $t_{R4} = 15.78$  min (minor).  $^1\text{H NMR}$  (400 MHz,  $\text{CHCl}_3$ )  $\delta$  7.26 (m, 2H), 7.22 (d,  $J = 7.6$  Hz, 1H), 7.15 (d,  $J = 7.2$  Hz, 1H), 5.08 (t,  $J = 7.2$  Hz, 1H), 4.97 (dd,  $J = 46.4, 7.6$  Hz, 1H), 4.18 (d,  $J = 3.6$  Hz, 1H), 3.00 (s, 3H), 2.97 (s, 3H), 2.37 (s, 3H).  $^{13}\text{C NMR}$  (100 MHz,  $\text{CDCl}_3$ )  $\delta$  168.0 (d,  $J = 19.8$  Hz), 138.7 (d,  $J = 1.8$  Hz), 138.1, 129.2, 128.3, 127.5, 124.1 (d,  $J = 1.4$  Hz), 88.4 (d,  $J = 184.8$  Hz), 72.7 (d,  $J = 24.5$  Hz), 36.9 (d,  $J = 5.8$  Hz), 35.8, 21.5.  $^{19}\text{F NMR}$  (376 MHz,  $\text{CDCl}_3$ )  $\delta$  -186.91. HRMS (ESI) calcd for  $\text{C}_{16}\text{H}_{17}\text{BrO}_3\text{S}$   $[\text{M}+\text{H}]^+$ : 225.1165, found: 225.1162.

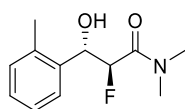

**(2S,3S)-2-fluoro-3-hydroxy-N,N-dimethyl-3-(*o*-tolyl)propanamide (2l):**

White solid, 85% yield, 60% *ee*, 89/11 *dr*, m.p. 87.0-90.8 °C;  $[\alpha]_D^{20} = +60.0$  ( $c = 0.1$ ,  $\text{CH}_2\text{Cl}_2$ ). The *ee* was determined by HPLC on Chiralpak ID-H column, hexane: isopropanol = 90:10; flow rate = 1.0 mL/min; column temperature 25 °C; UV detection at 220 nm;  $t_{R1} = 20.27$  min (major),  $t_{R2} = 23.15$  min (minor),  $t_{R3} = 26.33$  min (minor),  $t_{R4} = 31.41$  min (minor).  $^1\text{H NMR}$  (400 MHz,  $\text{CDCl}_3$ )  $\delta$  7.52 (d,  $J = 5.6$  Hz, 1H), 7.22 (m, 2H), 7.17 (d,  $J = 5.2$  Hz, 1H), 5.44 (t,  $J = 6.0$  Hz, 1H), 5.02 (dd,  $J = 46.4, 7.6$  Hz, 1H), 4.09 (s, 1H), 3.01 (s, 3H), 2.94 (s, 3H), 2.38 (s, 3H).  $^{13}\text{C NMR}$  (101 MHz,  $\text{CDCl}_3$ )  $\delta$  168.2 (d,  $J = 19.7$  Hz), 137.1, 136.4, 130.4, 128.2, 126.4, 126.4, 88.7 (d,  $J = 184.7$  Hz), 68.8 (d,  $J = 24.9$  Hz), 36.9 (d,  $J = 5.9$  Hz), 36.0, 19.5 (d,  $J = 2.6$  Hz).  $^{19}\text{F NMR}$  (376 MHz,  $\text{CDCl}_3$ )  $\delta$  -187.64. HRMS (ESI) calcd for  $\text{C}_{20}\text{H}_{20}\text{BrO}_3\text{S}$   $[\text{M}+\text{H}]^+$ : 225.1165, found: 225.1160.

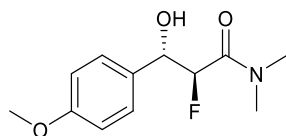

**(2S,3S)-2-fluoro-3-hydroxy-3-(4-methoxyphenyl)-N,N-dimethylpropanamide**

**(2m):**

White solid, 85% yield, 99% *ee*, 87/13 *dr*, m.p. 73.7-76.2 °C;  $[\alpha]_D^{20} = +54.0$  ( $c = 0.1$ ,  $\text{CH}_2\text{Cl}_2$ ). The *ee* was determined by HPLC on Chiralpak ID-H column, hexane: isopropanol = 90:10; flow rate = 1 mL/min; column temperature 25 °C; UV detection at 220 nm;  $t_{R1} = 38.81$  min (major),  $t_{R2} = 49.46$  min (minor),  $t_{R3} = 53.49$  min (minor),  $t_{R4} = 59.93$  min (minor).  $^1\text{H NMR}$  (400 MHz,  $\text{CDCl}_3$ )  $\delta$  7.35 (d,  $J = 8.4$  Hz, 2H), 6.91 (d,  $J = 8.8$  Hz, 2H), 5.07 (t,  $J = 6.8$  Hz, 1H), 4.94 (dd,  $J = 46.4, 7.6$  Hz, 1H), 3.81 (s, 3H), 2.99 (s, 3H), 2.97 (s, 3H).  $^{13}\text{C NMR}$  (100 MHz,  $\text{CDCl}_3$ )  $\delta$  168.1 (d,  $J = 19.7$  Hz),



159.6, 130.9 (d,  $J = 1.8$  Hz), 128.2, 128.1, 113.8, 88.5 (d,  $J = 184.6$  Hz), 72.3 (d,  $J = 24.4$  Hz), 55.3, 36.9 (d,  $J = 5.8$  Hz), 35.9.  $^{19}\text{F}$  NMR (376 MHz,  $\text{CDCl}_3$ )  $\delta$  -186.83. HRMS (ESI) calcd for  $\text{C}_{15}\text{H}_{17}\text{BrNO}_3\text{S}$   $[\text{M}+\text{H}]^+$ : 241.1114, found: 241.1118.

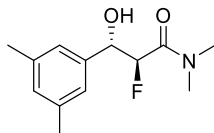

**(2S,3S)-3-(3,5-dimethylphenyl)-2-fluoro-3-hydroxy-N,N-dimethylpropanamide**

**(2n):**

Colorless liquid, 99% yield, 99% *ee*, 93/7 *dr*;  $[\alpha]_{\text{D}}^{20} = +83.0$  ( $c = 0.1$ ,  $\text{CH}_2\text{Cl}_2$ ). The *ee* was determined by HPLC on Chiralpak ID-H column, hexane: isopropanol = 90:10; flow rate = 1 mL/min; column temperature 25 °C; UV detection at 220 nm;  $t_{\text{R}1} = 17.35$  min (minor),  $t_{\text{R}2} = 18.96$  min (major),  $t_{\text{R}3} = 22.72$  min (minor),  $t_{\text{R}4} = 24.52$  min (minor).  $^1\text{H}$  NMR (400 MHz,  $\text{CDCl}_3$ )  $\delta$  7.05 (s, 2H), 6.99 (s, 1H), 5.04 – 4.91 (m, 2H), 4.20 (s, 1H), 3.00 (s, 3H), 2.97 (s, 3H), 2.32 (s, 6H).  $^{13}\text{C}$  NMR (100 MHz,  $\text{CDCl}_3$ )  $\delta$  168.1 (d,  $J = 19.9$  Hz), 138.7 (d,  $J = 1.7$  Hz), 138.0, 130.1, 124.7 (d,  $J = 1.3$  Hz), 88.4 (d,  $J = 184.5$  Hz), 72.7 (d,  $J = 24.5$  Hz), 36.9 (d,  $J = 5.7$  Hz), 35.9, 21.3.  $^{19}\text{F}$  NMR (376 MHz,  $\text{CDCl}_3$ )  $\delta$  -186.87. HRMS (ESI) calcd for  $\text{C}_{14}\text{H}_{16}\text{BrO}_3\text{S}_2$   $[\text{M}+\text{H}]^+$ : 239.1322, found: 239.1325.

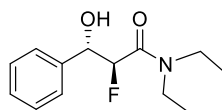

**(2S,3S)-N,N-diethyl-2-fluoro-3-hydroxy-3-phenylpropanamide (2o):**

Colorless liquid, 96% yield, 99% *ee*, 99/1 *dr*;  $[\alpha]_{\text{D}}^{20} = +46.0$  ( $c = 0.1$ ,  $\text{CH}_2\text{Cl}_2$ ). The *ee* was determined by HPLC on Chiralpak ID-H column, hexane: isopropanol = 95:5; flow rate = 1 mL/min; column temperature 25 °C; UV detection at 220 nm;  $t_{\text{R}1} = 14.77$  min (major),  $t_{\text{R}2} = 15.86$  min (minor),  $t_{\text{R}3} = 20.23$  min (minor),  $t_{\text{R}4} = 21.69$  min (minor).  $^1\text{H}$  NMR (400 MHz,  $\text{CDCl}_3$ )  $\delta$  7.44 (d,  $J = 6.4$  Hz, 2H), 7.40 – 7.33 (m, 3H), 5.14 (t,  $J = 7.2$  Hz, 1H), 4.91 (dd,  $J = 46.8, 7.6$  Hz, 1H), 4.41 (s, 1H), 3.47 – 3.23 (m, 4H), 1.17 – 1.09 (m, 6H).  $^{13}\text{C}$  NMR (100 MHz,  $\text{CDCl}_3$ )  $\delta$  167.4 (d,  $J = 19.8$  Hz), 138.8 (d,  $J = 1.9$  Hz), 128.4, 127.0, 88.3 (d,  $J = 185.0$  Hz), 72.8 (d,  $J = 24.4$  Hz), 41.9 (d,  $J = 4.5$  Hz), 40.7.  $^{19}\text{F}$  NMR (376 MHz,  $\text{CDCl}_3$ )  $\delta$  -186.09. HRMS (ESI) calcd for  $\text{C}_{11}\text{H}_{16}\text{BrO}_3\text{S}$   $[\text{M}+\text{H}]^+$ : 239.1322, found: 239.1320.

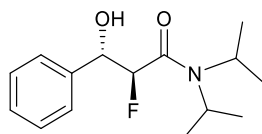

**(2S,3S)-2-fluoro-3-hydroxy-N,N-diisopropyl-3-phenylpropanamide (2p):**

White solid, 96% yield, 57% *ee*, 61/39 *dr*, m.p. 89.2-102.3 °C;  $[\alpha]_{\text{D}}^{20} = +16.0$  ( $c = 0.1$ ,  $\text{CH}_2\text{Cl}_2$ ). The *ee* was determined by HPLC on Chiralpak ID-H column, hexane: isopropanol = 90:10; flow rate = 1 mL/min; column temperature 25 °C; UV detection at 220 nm;  $t_{\text{R}1} = 9.98$  min (minor),  $t_{\text{R}2} = 11.02$  min (major),  $t_{\text{R}3} = 13.35$  min (minor),  $t_{\text{R}4} = 15.65$  min (minor).  $^1\text{H}$  NMR (400 MHz,  $\text{CDCl}_3$ )  $\delta$  7.45 (d,  $J = 7.2$  Hz, 2H), 7.39 – 7.31 (m, 3H), 5.20 (dd,  $J = 24.4, 3.6$  Hz, 1H), 5.05 (dd,  $J = 47.2, 3.6$  Hz, 1H), 4.21 (s, 1H), 3.96 – 3.89 (m, 1H), 3.48 – 3.44 (m, 1H),  $\delta$  1.45 – 1.35 (m, 6H), 1.06 (dd,  $J = 54.0, 6.8$  Hz, 6H).  $^{13}\text{C}$  NMR (100 MHz,  $\text{CDCl}_3$ )  $\delta$  166.8 (d,  $J = 20.0$  Hz), 138.2 (d,  $J = 3.5$  Hz), 128.5, 128.3, 127.1, 90.3 (d,  $J = 186.5$  Hz), 73.7 (d,  $J = 19.9$  Hz), 49.1 (d,  $J = 5.0$  Hz), 46.8, 20.9 (d,  $J = 35.1$  Hz), 20.3, 20.2.  $^{19}\text{F}$  NMR (376 MHz,  $\text{CDCl}_3$ )  $\delta$  -197.39. HRMS (ESI) calcd for  $\text{C}_{18}\text{H}_{20}\text{BrO}_3\text{S}$   $[\text{M}+\text{H}]^+$ : 267.1635, found: 267.1632.

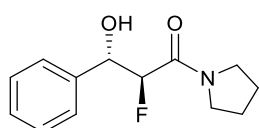

**(2S,3S)-2-fluoro-3-hydroxy-3-phenyl-1-(pyrrolidin-1-yl)propan-1-one (2q):**

Colorless liquid, 99% yield, 94% *ee*, 84/16 *dr*;  $[\alpha]_{\text{D}}^{20} = +23.8$  ( $c = 0.1$ ,  $\text{CH}_2\text{Cl}_2$ ). The *ee* was determined by HPLC on Chiralpak IA-H column, hexane: isopropanol = 94:6; flow rate = 1 mL/min; column temperature 25 °C; UV detection at 220 nm;  $t_{\text{R}1} = 24.60$  min (minor),  $t_{\text{R}2} = 27.21$  min (minor),  $t_{\text{R}3} = 28.98$  min (major),  $t_{\text{R}4} = 32.10$  min (minor).  $^1\text{H}$  NMR (400 MHz, Chloroform-*d*)  $\delta$  7.46 – 7.30 (m, 5H), 5.13 (t,  $J = 4.0$  Hz, 1H), 4.90 (dd,  $J = 47.2, 7.2$  Hz, 1H), 4.40 (d,  $J = 4.4$  Hz, 1H), 3.53 – 3.46 (m, 2H), 3.45 – 3.34 (m, 1H), 3.29 – 3.18 (m, 1H), 1.85 – 1.73 (m, 4H).  $^{13}\text{C}$  NMR (100 MHz, Chloroform-*d*)  $\delta$  166.7 (d,  $J = 20.3$  Hz), 138.9 (d,  $J = 2.2$  Hz), 128.5, 128.5, 127.0, 89.9 (d,  $J = 186.4$  Hz), 73.2 (d,  $J = 23.6$  Hz), 46.6, 26.1 (d,  $J = 1.8$  Hz), 23.7.  $^{19}\text{F}$  NMR (376 MHz, Chloroform-*d*)  $\delta$  -190.30. HRMS (ESI) calcd for  $\text{C}_{14}\text{H}_{14}\text{BrO}_3\text{S}$   $[\text{M}+\text{H}]^+$ : 237.1165, found: 237.1162.

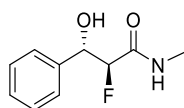

**(2S,3S)-2-fluoro-3-hydroxy-N-methyl-3-phenylpropanamide (2r):**

White solid, 98% yield, 99% *ee*, 75/25 *dr*, m.p. 123.0-125.4 °C;  $[\alpha]_{\text{D}}^{20} = -74.0$  ( $c = 0.1$ ,  $\text{CH}_2\text{Cl}_2$ ). The *ee* was determined by HPLC on Chiralpak IA-H column, hexane: isopropanol = 90:10; flow rate = 1 mL/min; column temperature 25 °C; UV detection at 220 nm;  $t_{\text{R}1} = 17.78$  min (minor),  $t_{\text{R}2} = 20.87$  min (major),  $t_{\text{R}3} = 22.83$  min (minor),  $t_{\text{R}4} = 26.44$  min (minor).  $^1\text{H}$  NMR (400 MHz, Chloroform-*d*)  $\delta$  7.43 – 7.31 (m, 5H), 6.32 (s, 1H), 5.01 (t,  $J = 6.8$  Hz, 1H), 4.90 (dd,  $J = 48.4, 6.8$  Hz, 1H), 4.08 (s, 1H), 2.82 (d,  $J = 4.8$  Hz, 1H).  $^{13}\text{C}$  NMR (100 MHz, Chloroform-*d*)  $\delta$  169.7 (d,  $J = 19.0$  Hz), 138.1 (d,  $J = 1.4$  Hz), 128.6, 128.4, 127.2, 91.6 (d,  $J = 193.3$  Hz), 73.6 (d,  $J = 20.8$  Hz), 25.7.

$^{19}\text{F}$  NMR (376 MHz, Chloroform-*d*)  $\delta$  -197.72. HRMS (ESI) calcd for  $\text{C}_{16}\text{H}_{19}\text{O}_3\text{S}$   $[\text{M}+\text{H}]^+$ : 197.0852, found:197.0856.

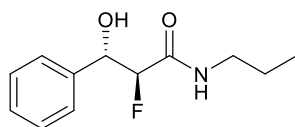

**(2S,3S)-2-fluoro-3-hydroxy-3-phenyl-N-propylpropanamide (2s):**

White solid, 98% yield, 99% *ee*, 74/26 *dr*, m.p. 101.7-104.6 °C;  $[\alpha]_{\text{D}}^{20} = -42.0$  ( $c = 0.1$ ,  $\text{CH}_2\text{Cl}_2$ ). The *ee* was determined by HPLC on Chiralpak IJ-H column, hexane: isopropanol = 90:10; flow rate = 1 mL/min; column temperature 25 °C; UV detection at 220 nm;  $t_{\text{R}1} = 11.04$  min (minor),  $t_{\text{R}2} = 12.38$  min (minor),  $t_{\text{R}3} = 19.94$  min (major),  $t_{\text{R}4} = 25.97$  min (minor).  $^1\text{H}$  NMR (400 MHz, Chloroform-*d*)  $\delta$  7.43 – 7.31 (m, 5H), 6.27 (s, 1H), 5.03 (t,  $J = 8.8$ , 1H), 4.93 (dd,  $J = 49.2$ ,  $J = 6.4$ , 1H), 4.00 (s, 1H), 3.29 – 3.08 (m, 2H), 1.73 (s, 1H), 1.46 (q,  $J = 7.0$  Hz, 2H), 0.84 (t,  $J = 7.6$  Hz, 3H).  $^{13}\text{C}$  NMR (100 MHz, Chloroform-*d*)  $\delta$  169.0 (d,  $J = 18.7$  Hz), 138.1, 128.7, 128.5, 127.3, 126.5 (d,  $J = 1.2$  Hz), 91.8 (d,  $J = 193.5$  Hz), 73.8 (d,  $J = 20.4$  Hz), 40.8, 22.6, 11.3.  $^{19}\text{F}$  NMR (376 MHz, Chloroform-*d*)  $\delta$  -198.20. HRMS (ESI) calcd for  $\text{C}_{17}\text{H}_{21}\text{O}_3\text{S}$   $[\text{M}+\text{H}]^+$ : 225.1165, found:225.1162.

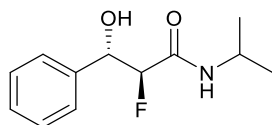

**(2S,3S)-2-fluoro-3-hydroxy-N-isopropyl-3-phenylpropanamide (2t):**

White solid, 94% yield, 99% *ee*, 73/27 *dr*, m.p. 112.4-117.3 °C;  $[\alpha]_{\text{D}}^{20} = -18.0$  ( $c = 0.1$ ,  $\text{CH}_2\text{Cl}_2$ ). The *ee* was determined by HPLC on Chiralpak AD-H column, hexane: isopropanol = 98:2; flow rate = 1 mL/min; column temperature 25 °C; UV detection at 220 nm;  $t_{\text{R}1} = 11.01$  min (minor),  $t_{\text{R}2} = 12.53$  min (minor),  $t_{\text{R}3} = 28.05$  min (major),  $t_{\text{R}4} = 43.78$  min (minor).  $^1\text{H}$  NMR (400 MHz, Chloroform-*d*)  $\delta$  7.43 – 7.32 (m, 5H), 6.01 (s, 1H), 5.02 (dd,  $J = 15.6$ , 6.0 Hz, 1H), 4.90 (dd,  $J = 49.2$ , 6.0 Hz, 1H), 4.06 (m, 1H), 3.96 (s, 1H), 1.14 (d,  $J = 6.4$  Hz, 3H), 1.02 (d,  $J = 6.4$  Hz, 3H).  $^{13}\text{C}$  NMR (100 MHz, Chloroform-*d*)  $\delta$  167.9 (d,  $J = 18.6$  Hz), 138.0 (d,  $J = 1.5$  Hz), 128.5, 128.3, 127.2 (d,  $J = 1.1$  Hz), 91.6 (d,  $J = 193.7$  Hz), 73.7 (d,  $J = 20.4$  Hz), 41.3, 22.4.  $^{19}\text{F}$  NMR (376 MHz, Chloroform-*d*)  $\delta$  -198.36. HRMS (ESI) calcd for  $\text{C}_{17}\text{H}_{21}\text{O}_4\text{S}$   $[\text{M}+\text{H}]^+$ : 225.1165, found: 225.1161.

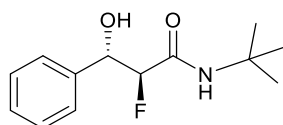

**(2S,3S)-N-(tert-butyl)-2-fluoro-3-hydroxy-3-phenylpropanamide (2u):**

White solid, 94% yield, 98% *ee*, 91/9 *dr*, m.p. 153.9-156.4 °C;  $[\alpha]_{\text{D}}^{20} = -24.0$  ( $c = 0.1$ ,  $\text{CH}_2\text{Cl}_2$ ). The *ee* was determined by HPLC on Chiralpak ID-H column, hexane:

isopropanol = 90:10; flow rate = 1 mL/min; column temperature 25 °C; UV detection at 220 nm;  $t_{R1}$  = 21.08 min (minor),  $t_{R2}$  = 24.19 min (minor),  $t_{R3}$  = 27.18 min (minor),  $t_{R4}$  = 31.07 min (major).  $^1\text{H}$  NMR (400 MHz,  $\text{CDCl}_3$ )  $\delta$  7.40 – 7.34 (m, 5H), 5.97 (s, 1H), 5.01 (dd,  $J$  = 16.0, 6.0 Hz, 1H), 4.84 (dd,  $J$  = 49.6, 6.0 Hz, 1H), 1.29 (s, 9H).  $^{13}\text{C}$  NMR (100 MHz,  $\text{CDCl}_3$ )  $\delta$  168.1 (d,  $J$  = 17.4 Hz), 138.1 (d,  $J$  = 1.4 Hz), 128.6, 128.4, 127.4, 91.7 (d,  $J$  = 194.9 Hz), 73.9 (d,  $J$  = 20.4 Hz), 51.8, 28.6.  $^{19}\text{F}$  NMR (376 MHz,  $\text{CDCl}_3$ )  $\delta$  -195.90. HRMS (ESI) calcd for  $\text{C}_{17}\text{H}_{18}\text{F}_3\text{O}_3\text{S}$   $[\text{M}+\text{H}]^+$ : 239.1322, found: 239.1320.

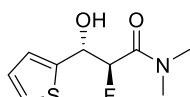

**(2S,3R)-2-fluoro-3-hydroxy-N,N-dimethyl-3-(thiophen-2-yl)propanamide (4a):**

Colorless liquid, 99% yield, 99% *ee*, 97/3 *dr*;  $[\alpha]_{\text{D}}^{20}$  = +89.0 ( $c$  = 0.1,  $\text{CH}_2\text{Cl}_2$ ). The *ee* was determined by HPLC on Chiralpak ID-H column, hexane: isopropanol = 90:10; flow rate = 1 mL/min; column temperature 25 °C; UV detection at 220 nm;  $t_{R1}$  = 11.19 min (minor),  $t_{R2}$  = 12.43 min (minor),  $t_{R3}$  = 13.33 min (major),  $t_{R4}$  = 17.07 min (minor).  $^1\text{H}$  NMR (400 MHz,  $\text{CDCl}_3$ )  $\delta$  7.32 (d,  $J$  = 4.8 Hz, 1H), 7.10 (d,  $J$  = 3.6 Hz, 1H), 7.01 (dd,  $J$  = 4.8 Hz,  $J$  = 3.6 Hz, 1H), 5.38 (t,  $J$  = 3.2 Hz, 1H), 4.99 (dd,  $J$  = 46.4, 7.6 Hz, 1H), 4.42 (d,  $J$  = 4.0 Hz, 1H), 3.06 (s, 3H), 3.01 (s, 3H).  $^{13}\text{C}$  NMR (100 MHz,  $\text{CDCl}_3$ )  $\delta$  167.8 (d,  $J$  = 19.6 Hz), 142.3, 142.3, 127.0, 125.7 (d,  $J$  = 1.7 Hz), 125.6, 88.2 (d,  $J$  = 185.9 Hz), 69.5 (d,  $J$  = 25.4 Hz), 37.1 (d,  $J$  = 5.9 Hz), 36.0.  $^{19}\text{F}$  NMR (376 MHz,  $\text{CDCl}_3$ )  $\delta$  -186.22. HRMS (ESI) calcd for  $\text{C}_{16}\text{H}_{18}\text{FO}_3\text{S}$   $[\text{M}+\text{H}]^+$ : 217.0573, found: 217.0575.

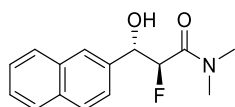

**(2S,3S)-2-fluoro-3-hydroxy-N,N-dimethyl-3-(naphthalen-2-yl)propanamide (4b):**

White solid, 98% yield, 92% *ee*, 96/4 *dr*, m.p. 137.1-141.8 °C;  $[\alpha]_{\text{D}}^{20}$  = +52.0 ( $c$  = 0.1,  $\text{CH}_2\text{Cl}_2$ ). The *ee* was determined by HPLC on Chiralpak OD-H column, hexane: isopropanol = 90:10; flow rate = A mL/min; column temperature 25 °C; UV detection at 220 nm;  $t_{R1}$  = 13.02 min (minor),  $t_{R2}$  = 15.76 min (minor),  $t_{R3}$  = 19.96 min (major),  $t_{R4}$  = 24.42 min (minor).  $^1\text{H}$  NMR (400 MHz, Chloroform-*d*)  $\delta$  7.93 (s, 1H), 7.89 – 7.82 (m, 3H), 7.55 (d,  $J$  = 8.8 Hz, 1H), 7.53 – 7.46 (m, 2H), 5.30 (t,  $J$  = 6.8 Hz, 1H), 5.06 (dd,  $J$  = 46.4, 7.2 Hz, 1H), 4.33 (s, 1H), 3.01 (d,  $J$  = 1.6 Hz, 3H), 2.97 (d,  $J$  = 2.4 Hz, 3H).  $^{13}\text{C}$  NMR (100 MHz, Chloroform-*d*)  $\delta$  168.0 (d,  $J$  = 19.6 Hz), 136.2 (d,  $J$  = 1.7 Hz), 133.3 (d,  $J$  = 15.0 Hz), 128.1 (d,  $J$  = 1.4 Hz), 127.7, 126.2, 126.2, 124.6, 88.4 (d,  $J$  = 185.2 Hz), 72.9 (d,  $J$  = 24.3 Hz), 36.9 (d,  $J$  = 5.8 Hz), 35.9.  $^{19}\text{F}$  NMR (376 MHz, Chloroform-*d*)  $\delta$  -186.61. HRMS (ESI) calcd for  $\text{C}_{17}\text{H}_{21}\text{O}_3\text{S}$   $[\text{M}+\text{H}]^+$ : 261.1165, found: 261.1162.

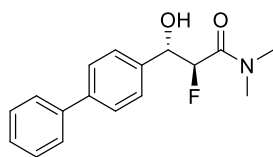

**(2S,3S)-3-([1,1'-biphenyl]-4-yl)-2-fluoro-3-hydroxy-N,N-dimethylpropanamide**

**(4c):**

White solid, 99% yield, 95% *ee*, 96/4 *dr*, m.p. 136.3-139.2 °C;  $[\alpha]_D^{20} = +58.0$  (*c* = 0.1, CH<sub>2</sub>Cl<sub>2</sub>). The *ee* was determined by HPLC on Chiralpak ID-H column, hexane: isopropanol = 90:10; flow rate = 1 mL/min; column temperature 25 °C; UV detection at 220 nm; *t*<sub>R1</sub> = 34.48 min (major), *t*<sub>R2</sub> = 37.97 min (minor), *t*<sub>R3</sub> = 43.12 min (minor), *t*<sub>R4</sub> = 49.75 min (minor). <sup>1</sup>H NMR (400 MHz, CDCl<sub>3</sub>) δ 7.61 (t, *J* = 7.6, 4H), 7.52 (d, *J* = 8.0 Hz, 2H), 7.44 (t, *J* = 8.0 Hz, 2H), 7.35 (t, *J* = 7.2 Hz, 1H), 5.17 (t, *J* = 4.0 Hz, 1H), 5.00 (dd, *J* = 46.4, 7.6 Hz, 1H), 4.24 (d, *J* = 4.0 Hz, 1H), 3.01 (s, 6H). <sup>13</sup>C NMR (100 MHz, CDCl<sub>3</sub>) δ 168.1 (d, *J* = 19.6 Hz), 141.4, 140.9, 137.9, 137.9, 128.9, 127.5, 127.5, 127.3 (d, *J* = 1.8 Hz), 88.5 (d, *J* = 185.2 Hz), 72.6 (d, *J* = 24.4 Hz), 37.0 (d, *J* = 5.9 Hz), 36.0, 1.2. <sup>19</sup>F NMR (376 MHz, CDCl<sub>3</sub>) δ -186.83. HRMS (ESI) calcd for C<sub>17</sub>H<sub>21</sub>O<sub>4</sub>S [M+H]<sup>+</sup>: 287.1322, found: 287.1326.

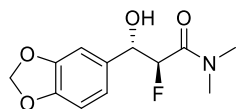

**(2S,3S)-3-(benzo[d][1,3]dioxol-5-yl)-2-fluoro-3-hydroxy-N,N-dimethylpropanamide (4d):**

White solid, 91% yield, 98% *ee*, 92/8 *dr*, m.p. 140.2-143.6 °C;  $[\alpha]_D^{20} = +58.0$  (*c* = 0.1, CH<sub>2</sub>Cl<sub>2</sub>). The *ee* was determined by HPLC on Chiralpak OD-H column, hexane: isopropanol = 90:10; flow rate = 1 mL/min; column temperature 25 °C; UV detection at 220 nm; *t*<sub>R1</sub> = 38.58 min (minor), *t*<sub>R2</sub> = 43.85 min (minor), *t*<sub>R3</sub> = 51.53 min (major), *t*<sub>R4</sub> = 71.31 min (minor). <sup>1</sup>H NMR (600 MHz, Chloroform-d) δ 6.94 (s, 1H), 6.89 (d, *J* = 7.8 Hz, 1H), 6.80 (d, *J* = 7.8 Hz, 1H), 5.96 (s, 4H), 5.02 (t, *J* = 6.6 Hz, 1H), 4.89 (dd, *J* = 46.2, 7.8 Hz, 1H), 4.16 (s, 1H), 3.01 (s, 6H). <sup>13</sup>C NMR (151 MHz, Chloroform-d) δ 168.1 (d, *J* = 19.9 Hz), 147.8 (d, *J* = 29.0 Hz), 132.8, 120.8, 108.3, 107.4, 101.2, 88.5 (d, *J* = 186.0 Hz), 72.5 (d, *J* = 24.9 Hz), 37.0 (d, *J* = 5.9 Hz), 36.0. <sup>19</sup>F NMR (565 MHz, Chloroform-d) δ -186.69. HRMS (ESI) calcd for C<sub>17</sub>H<sub>21</sub>O<sub>4</sub>S [M+H]<sup>+</sup>: 255.0907, found: 255.0905.

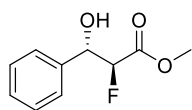

**Methyl (2S,3S)-2-fluoro-3-hydroxy-3-phenylpropanoate (4e):**

White solid, 85% yield, 70% *ee*, 70/30 *dr*, m.p. 136.6-140.0 °C;  $[\alpha]_D^{20} = +6.0$  (*c* = 0.1, CH<sub>2</sub>Cl<sub>2</sub>). The *ee* was determined by HPLC on Chiralpak OJ-H column, hexane:

isopropanol = 90:10; flow rate = 1 mL/min; column temperature 25 °C; UV detection at 220 nm;  $t_{R1}$  = 43.61 min (minor),  $t_{R2}$  = 45.87 min (minor),  $t_{R3}$  = 51.64 min (minor),  $t_{R4}$  = 60.24 min (major).  $^1\text{H}$  NMR (400 MHz, Chloroform-*d*)  $\delta$  7.43 – 7.33 (m, 5H), 5.13 (d,  $J$  = 2.4 Hz, 1H), 5.05 (dd,  $J$  = 38.0, 5.2 Hz, 1H), 3.74 (s, 3H).  $^{13}\text{C}$  NMR (100 MHz, Chloroform-*d*)  $\delta$  168.4 (d,  $J$  = 23.3 Hz), 137.7 (d,  $J$  = 2.7 Hz), 126.8 (d,  $J$  = 1.2 Hz), 91.1 (d,  $J$  = 189.6 Hz), 73.7 (d,  $J$  = 22.2 Hz),  $\delta$  52.6 (s,  $J$  = 23.3 Hz).  $^{19}\text{F}$  NMR (376 MHz, Chloroform-*d*)  $\delta$  -197.67. HRMS (ESI) calcd for  $\text{C}_{16}\text{H}_{18}\text{BrO}_3\text{S}$   $[\text{M}+\text{H}]^+$ : 198.0692, found: 198.0695.

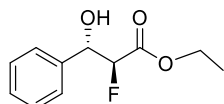

**Ethyl (2*S*,3*S*)-2-fluoro-3-hydroxy-3-phenylpropanoate (4f):**

Colorless liquid, 90% yield, 95% *ee*, 95/5 *dr.*;  $[\alpha]_{\text{D}}^{20}$  = +28.0 ( $c$  = 0.1,  $\text{CH}_2\text{Cl}_2$ ). The *ee* was determined by HPLC on Chiralpak ID-H column, hexane: isopropanol = 94:6; flow rate = 1 mL/min; column temperature 25 °C; UV detection at 220 nm;  $t_{R1}$  = 50.41 min (minor),  $t_{R2}$  = 54.17 min (minor),  $t_{R3}$  = 60.90 min (minor),  $t_{R4}$  = 78.50 min (major).  $^1\text{H}$  NMR (400 MHz,  $\text{CDCl}_3$ )  $\delta$  7.39 – 7.34 (m, 5H), 5.13 (t,  $J$  = 4.0 Hz, 1H), 5.04 (dd,  $J$  = 48.0, 4.8 Hz, 1H), 4.18 (q,  $J$  = 7.2 Hz, 2H), 3.02 (d,  $J$  = 4.0 Hz, 1H), 1.19 (t,  $J$  = 8.0 Hz, 3H).  $^{13}\text{C}$  NMR (100 MHz,  $\text{CDCl}_3$ )  $\delta$  167.9 (d,  $J$  = 23.2 Hz), 137.7 (d,  $J$  = 3.0 Hz), 128.7, 128.6, 126.9 (d,  $J$  = 1.4 Hz), 91.1 (d,  $J$  = 189.6 Hz), 73.8 (d,  $J$  = 22.0 Hz), 61.9, 14.1.  $^{19}\text{F}$  NMR (376 MHz,  $\text{CDCl}_3$ )  $\delta$  -197.73. HRMS (ESI) calcd for  $\text{C}_{17}\text{H}_{21}\text{O}_3\text{S}$   $[\text{M}+\text{H}]^+$ : 212.0849, found: 212.0845.

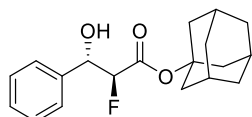

**(3*R*,5*R*,7*R*)-adamantan-1-yl-(2*S*,3*S*)-2-fluoro-3-hydroxy-3-phenylpropanoate (4g):**

Colorless liquid, 85% yield, 73% *ee*, 95/5 *dr.*;  $[\alpha]_{\text{D}}^{20}$  = +54.0 ( $c$  = 0.1,  $\text{CH}_2\text{Cl}_2$ ). The *ee* was determined by HPLC on Chiralpak IJ-H column, hexane: isopropanol = 90:10; flow rate = 1 mL/min; column temperature 25 °C; UV detection at 220 nm;  $t_{R1}$  = 12.43 min (minor),  $t_{R2}$  = 13.59 min (major),  $t_{R3}$  = 15.31 min (minor),  $t_{R4}$  = 16.27 min (minor).  $^1\text{H}$  NMR (400 MHz, Chloroform-*d*)  $\delta$  7.44 – 7.30 (m, 5H), 5.10 (d,  $J$  = 16.4 Hz, 1H), 4.95 (dd,  $J$  = 48.5, 4.8 Hz, 1H), 2.83 (d,  $J$  = 4.4 Hz, 1H), 2.18 – 2.11 (m, 3H), 2.00 (s, 3H), 1.63 (s, 3H).  $^{13}\text{C}$  NMR (100 MHz, Chloroform-*d*)  $\delta$  166.3 (d,  $J$  = 23.2 Hz), 137.9 (d,  $J$  = 3.3 Hz), 128.5, 128.4, 91.1 (d,  $J$  = 189.2 Hz), 83.5, 73.8 (d,  $J$  = 21.7 Hz), 68.1, 41.2, 36.1, 31.0, 25.7.  $^{19}\text{F}$  NMR (376 MHz, Chloroform-*d*)  $\delta$  -196.06. HRMS (ESI) calcd for  $\text{C}_{17}\text{H}_{21}\text{O}_4\text{S}$   $[\text{M}+\text{H}]^+$ : 318.1631, found: 318.1635.

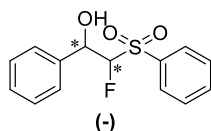

### 2-fluoro-1-phenyl-2-(phenylsulfonyl)ethan-1-ol (**4h**):

Colorless liquid, 87% yield, 99% *ee*, 82/18 *dr*;  $[\alpha]_D^{20} = -18.0$  ( $c = 0.1$ ,  $\text{CH}_2\text{Cl}_2$ ). The *ee* was determined by HPLC on Chiralpak ID-H column, hexane: isopropanol = 90:10; flow rate = 1 mL/min; column temperature 25 °C; UV detection at 220 nm;  $t_{R1} = 83.61$  min (minor),  $t_{R2} = 85.50$  min (major),  $t_{R3} = 89.80$  min (minor),  $t_{R4} = 123.58$  min (minor).  $^1\text{H}$  NMR (400 MHz, Chloroform-*d*)  $\delta$  7.99 (d,  $J = 7.6$  Hz, 2H), 7.74 (t,  $J = 7.6$  Hz, 1H), 7.62 (t,  $J = 7.6$  Hz, 2H), 7.43 – 7.31 (m, 5H), 5.22 – 5.17 (m, 1H), 5.07 (dd,  $J = 45.6$ , 8.4 Hz, 1H), 3.53 (s, 1H).  $^{13}\text{C}$  NMR (100 MHz, Chloroform-*d*)  $\delta$  136.8, 135.4, 135.2, 129.6, 129.6, 129.3, 128.7, 127.4 (d,  $J = 1.6$  Hz), 101.6 (d,  $J = 224.2$  Hz), 70.6 (d,  $J = 22.2$  Hz).  $^{19}\text{F}$  NMR (376 MHz, Chloroform-*d*)  $\delta$  -177.95. HRMS (ESI) calcd for  $\text{C}_{17}\text{H}_{21}\text{O}_4\text{S}$   $[\text{M}+\text{H}]^+$ : 280.0569, found: 280.0563.

## 5. General procedure for gram-scale reaction and Further transformations

### Gram-scale reaction

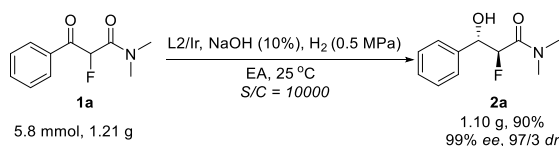

Under argon atmosphere,  $[\text{Ir}(\text{COD})\text{Cl}]_2$  (1.95 mg, 0.0029 mmol), **L2** (3.48 mg, 0.0061 mmol), and anhydrous *i*PrOH (4 mL) were added to an oven-dried vial (10 mL) and then stirred at 40 °C for 1.0 h to give a clear yellow solution. The mixture was concentrated to dryness, then 2 mL of dried ethyl acetate was added to the crude Ir-**L2** complex. An aliquot of the catalyst solution (0.2 mL, 0.00058 mmol) was transferred into a 10 mL hydrogenation vessel, and then substrates **1a** (5.8 mmol), NaOH (23.2 mg, 0.58 mmol, in EA) and anhydrous ethyl acetate were added. The vial was placed in an alloy plate which was then placed into the autoclave. And the autoclave was purged five times with argon atmosphere and hydrogen, then pressurized to 5 atm of  $\text{H}_2$  and stirred at 25 °C for 24 h. Upon completion, the reaction mixture was cooled to room temperature. After the hydrogen pressure was slowly released, the solvent was removed, and the mixture was purified by passing through a short column of silica gel to afford the corresponding products **2a** with 1.10 g, 90% yield in 99% *ee* and 97/3 *dr*.

### Further transformations

#### (1) The synthesis of **5a**

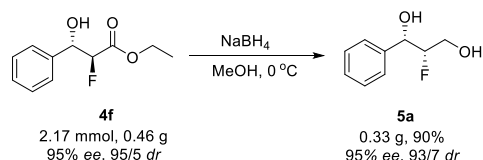

Under N<sub>2</sub> atmosphere, a solution of **4f** (2.17 mmol) and NaBH<sub>4</sub> (3.26 mmol, 1.5 eq.) in the solvent MeOH (5 mL) was stirred at 0 °C for 0.5 h. The solvent was removed under vacuum and 20 mL water and 15 mL DCM were added, organic layer was combined and dried by anhydrous sodium sulfate. The reaction mixture was filtered and concentrated to get the crude product **5a**. The crude product **5a** was purified by column chromatography on silica gel to get colorless liquid 0.330 g, 90% yield, 95% ee, 93/7 dr.

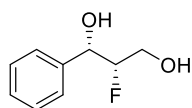

### (1*S*,2*S*)-2-fluoro-1-phenylpropane-1,3-diol (**5a**):

Colorless liquid, 90% yield, 93% ee;  $[\alpha]_D^{20} = +38.0$  ( $c = 0.1$ , CH<sub>2</sub>Cl<sub>2</sub>). The ee was determined by HPLC on Chiralpak IJ-H column, hexane: isopropanol = 92:8; flow rate = 0.8 mL/min; column temperature 25 °C; UV detection at 220 nm;  $t_{R1} = 38.14$  min (major),  $t_{R2} = 41.71$  min (minor),  $t_{R3} = 43.79$  min (minor),  $t_{R4} = 49.06$  min (minor). <sup>1</sup>H NMR (600 MHz, Chloroform-d)  $\delta$  7.40 – 7.31 (m, 5H), 5.00 (dd,  $J = 10.8, 6.0$  Hz, 1H), 4.67 – 4.54 (m, 1H), 3.93 – 3.82 (m, 2H). <sup>13</sup>C NMR (150 MHz, Chloroform-d)  $\delta$  139.4 (d,  $J = 4.5$  Hz), 128.7, 128.3, 126.4, 95.1 (d,  $J = 175.6$  Hz), 73.5 (d,  $J = 24.5$  Hz), 61.7 (d,  $J = 21.9$  Hz). <sup>19</sup>F NMR (565 MHz, Chloroform-d)  $\delta$  -195.22. HRMS (ESI) calcd for C<sub>22</sub>H<sub>23</sub>O<sub>3</sub>S [M+H]<sup>+</sup>: 170.0473, found: 170.0476.

### (2) The synthesis of **5b**

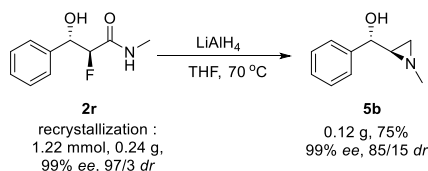

Under N<sub>2</sub> atmosphere, LiAlH<sub>4</sub> (1.83 mmol, 1.5 eq.) was added to a solution of **2r** (1.22 mmol) in 10 mL dry THF at 0 °C and was stirred for an hour. Then the mixture was stirred at 70 °C overnight. The reaction was quenched with water in an ice-water after the finishing reaction. The solvent was removed and 20 mL water and 15 mL DCM were added, organic layer was combined and dried by anhydrous sodium sulfate.



The reaction mixture was filtered and concentrated to get the crude product **5b**. The crude product **5b** was purified by column chromatography on silica gel to get a white solid, 120 mg, 75% yield, 99% *ee*. and 85/15 *dr*.

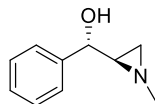

**(S)-((R)-1-methylaziridin-2-yl)(phenyl)methanol (**5b**):**

White solid, 75% yield, 99% *ee*, 85/15 *dr.*, m.p. 82.5-85.6 °C;  $[\alpha]_D^{20} = -48.0$  ( $c = 0.1$ ,  $\text{CH}_2\text{Cl}_2$ ). The *ee* was determined by HPLC on Chiralpak ID-H column, hexane: isopropanol = 90:10; flow rate = 1 mL/min; column temperature 25 °C; UV detection at 210 nm;  $t_{R1} = 12.94$  min (major),  $t_{R2} = 17.13$  min (minor),  $t_{R3} = 31.02$  min (minor),  $t_{R4} = 68.02$  min (minor).  $^1\text{H NMR}$  (600 MHz, Chloroform-*d*)  $\delta$  7.41 (d,  $J = 7.8$  Hz, 2H), 7.36 (t,  $J = 7.8$  Hz, 2H), 7.29 (t,  $J = 7.8$  Hz, 1H), 4.71 (s, 1H), 4.23 (d,  $J = 6.0$  Hz, 1H), 2.41 (s, 3H), 1.92 (d,  $J = 3.6$  Hz, 1H), 1.74 – 1.72 (m, 1H), 1.33 (d,  $J = 6.6$  Hz, 1H).  $^{13}\text{C NMR}$  (151 MHz, Chloroform-*d*)  $\delta$  142.6, 128.6, 127.7, 126.1, 74.5, 47.3, 46.8, 33.5. HRMS (ESI) calcd for  $\text{C}_{19}\text{H}_{21}\text{O}_3\text{S}$   $[\text{M}+\text{H}]^+$ : 163.0997, found: 163.0993.

## 6. Determination of the absolute configuration

Crystal structure determination of **2f**

**Crystal Data** for  $\text{C}_{12}\text{H}_{13}\text{F}_4\text{NO}_2$  ( $M = 279.23$  g/mol): monoclinic, space group  $\text{P}2_1$  (no. 4),  $a = 6.3753(5)$  Å,  $b = 7.7643(6)$  Å,  $c = 13.1312(9)$  Å,  $\beta = 97.979(3)$ ,  $V = 643.70(8)$  Å<sup>3</sup>,  $Z = 2$ ,  $T = 170.00$  K,  $\mu(\text{GaK}\alpha) = 0.764$  mm<sup>-1</sup>,  $D_{\text{calc}} = 1.441$  g/cm<sup>3</sup>, 15240 reflections measured ( $11.548^\circ \leq 2\theta \leq 122.216^\circ$ ), 2915 unique ( $R_{\text{int}} = 0.0434$ ,  $R_{\text{sigma}} = 0.0386$ ) which were used in all calculations. The final  $R_1$  was 0.0366 ( $I > 2\sigma(I)$ ) and  $wR_2$  was 0.1008 (all data).

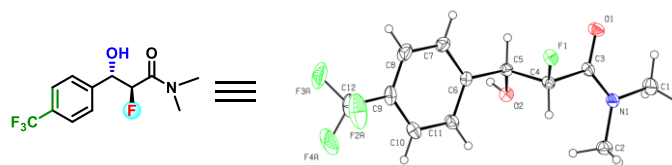

## 7. References

1. F. Ling, S. Nian, J. Chen, W. Luo, Z. Wang, Y. Lv and W. Zhong, Development of Ferrocene-Based Diamine-Phosphine-Sulfonamide Ligands for Iridium-Catalyzed Asymmetric Hydrogenation of Ketones, *J. Org. Chem.*, 2018, **83**, 10749-10761.
2. S. Nian, F. Ling, J. Chen, Z. Wang, H. Shen, X. Yi, Y. F. Yang, Y. She and W. Zhong, Highly Enantioselective Hydrogenation of Non-*ortho*-Substituted 2-Pyridyl Aryl Ketones via Iridium *f*-Diaphos Catalysis, *Org. Lett.*, 2019, **21**, 5392-5396.
3. F. Ling, Y. Wang, A. Huang, Z. Wang, S. Wang, J. He, X. Zhao and W. Zhong, Iridium-Catalyzed Enantioselective and Diastereoselective Hydrogenation of Racemic  $\beta'$ -Keto- $\beta$ -Amino Esters via Dynamic Kinetic Resolution, *Adv. Synth. Catal.*, 2021, **363**, 4714-4719.
4. Z. Wang, X. Zhao, S. Wang, A. Huang, Y. Wang, J. He, F. Ling and W. Zhong, Iridium/*f*-diaphos catalyzed asymmetric hydrogenation of 2-imidazolyl aryl/alkyl ketones, *Org. Biomol. Chem.*, 2021, **19**, 9746-9751.
5. X. Zhao, Z. Yang, Y. Cheng, A. Huang, F. Hu, F. Ling and W. Zhong, Divergent Synthesis of  $\beta$ -Hydroxy Amides (Esters) and  $\gamma$ -Amino Alcohols via Ir/*f*-Diaphos Catalyzed Asymmetric Hydrogenation, *Adv. Synth. Catal.*, 2022, **364**, 3074-3080
6. A. M. Goldys, M. G. Nunez and D. J. Dixon, Creation through immobilization: a new family of high performance heterogeneous bifunctional iminophosphorane (BIMP) superbases organocatalysts, *Org. Lett.*, 2014, **16**, 6294-6297.
7. S. Suzuki, T. Kamo, K. Fukushi, T. Hiramatsu, E. Tokunaga, T. Dohi, Y. Kita and N. Shibata, Iodoarene-catalyzed fluorination and aminofluorination by an Ar-I/HF·pyridine/*m*-CPBA system, *Chem. Sci.*, 2014, **5**, 2754-2760.

## 8. Copies of NMR spectra

### (2*S*,3*S*)-2-fluoro-3-hydroxy-*N,N*-dimethyl-3-phenylpropanamide (2a):

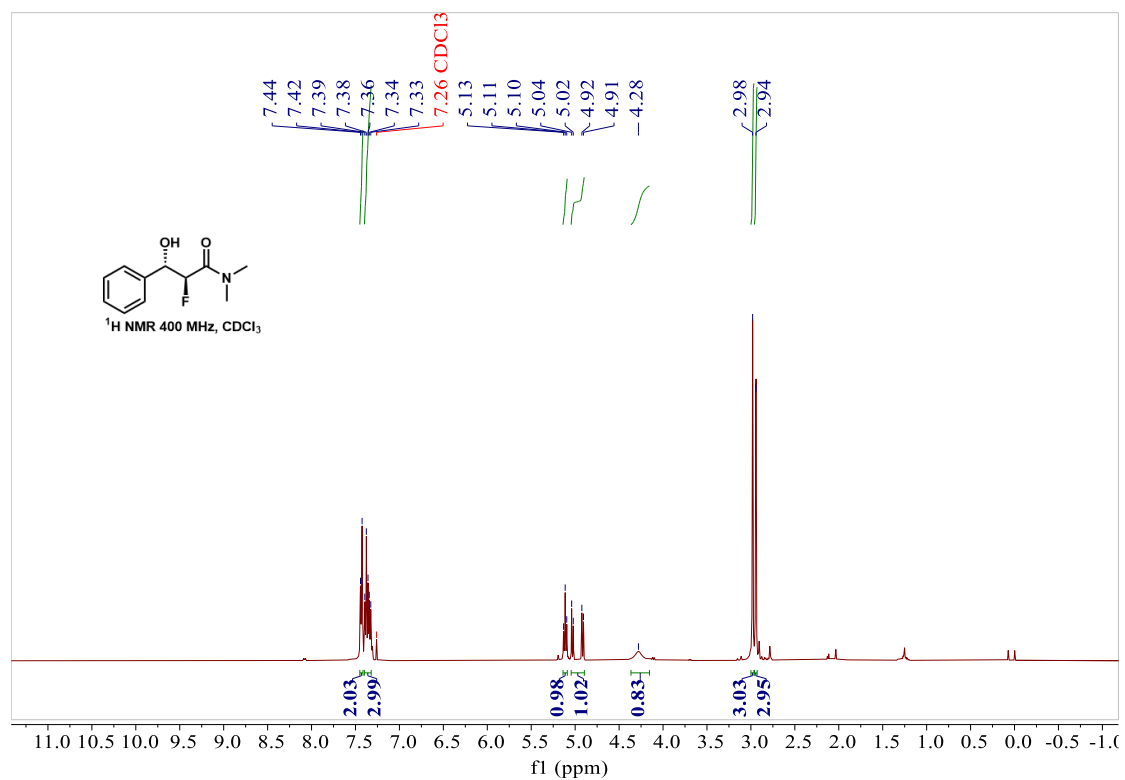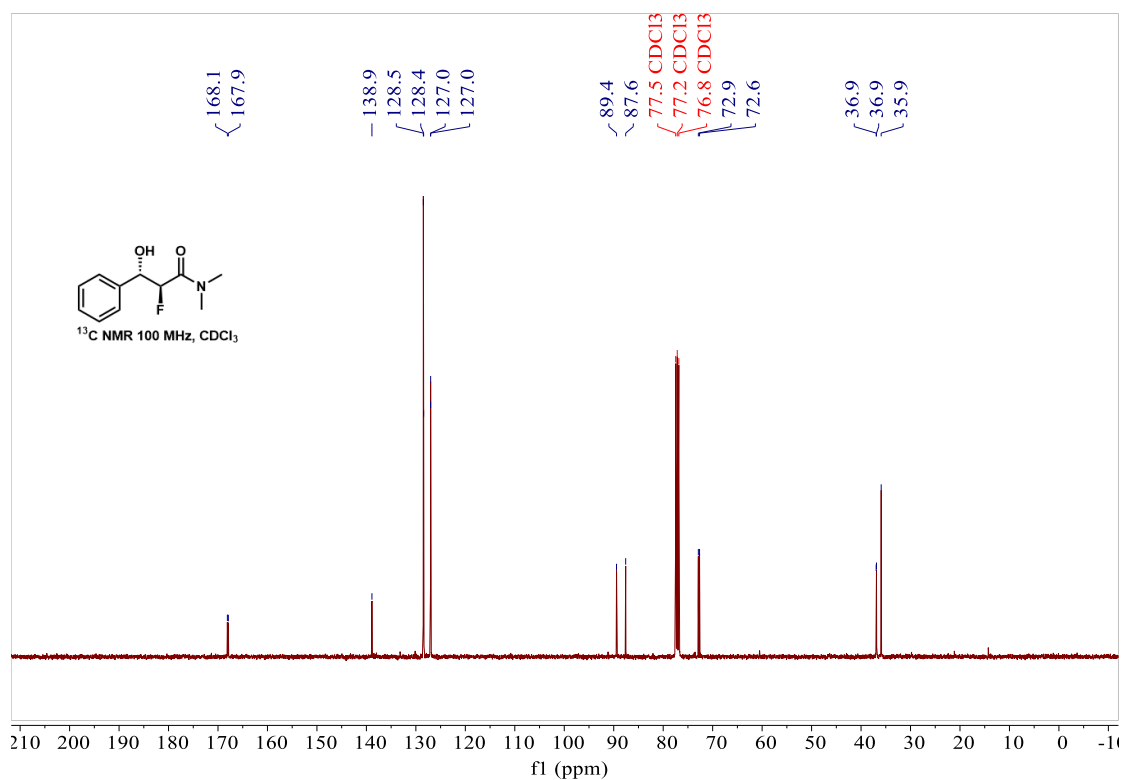

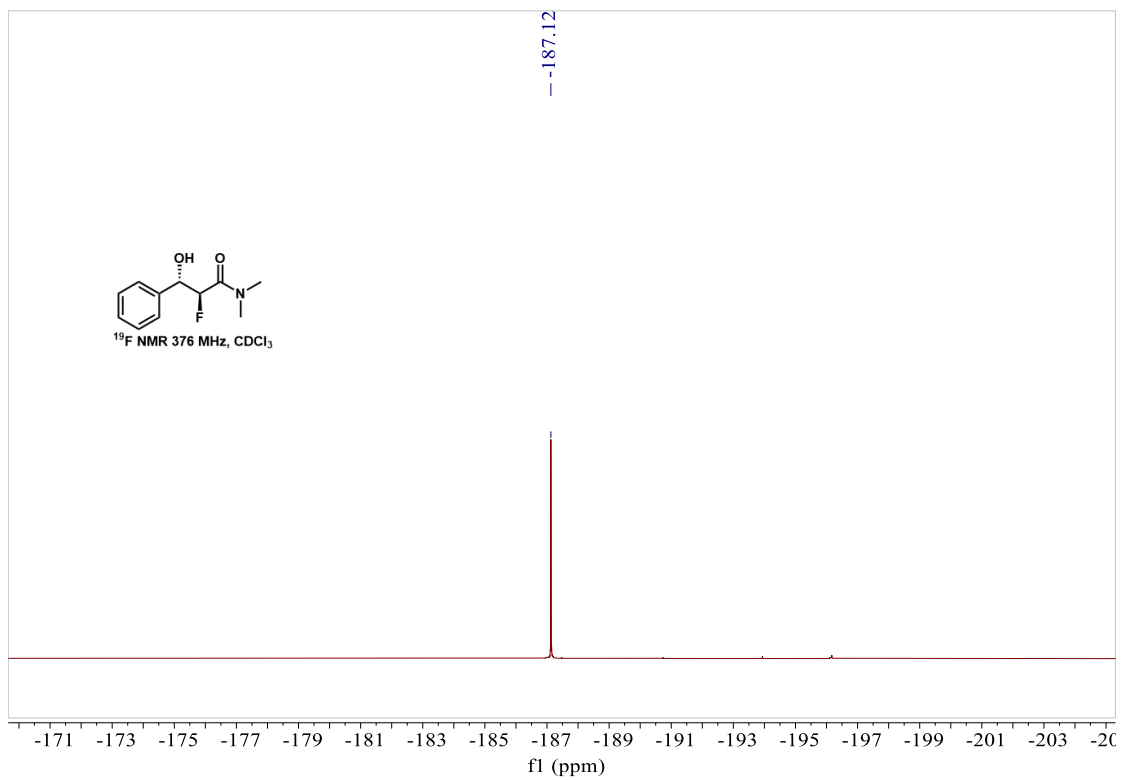

**(2S,3S)-3-(4-bromophenyl)-2-fluoro-3-hydroxy-N,N-dimethylpropanamide (2b):**

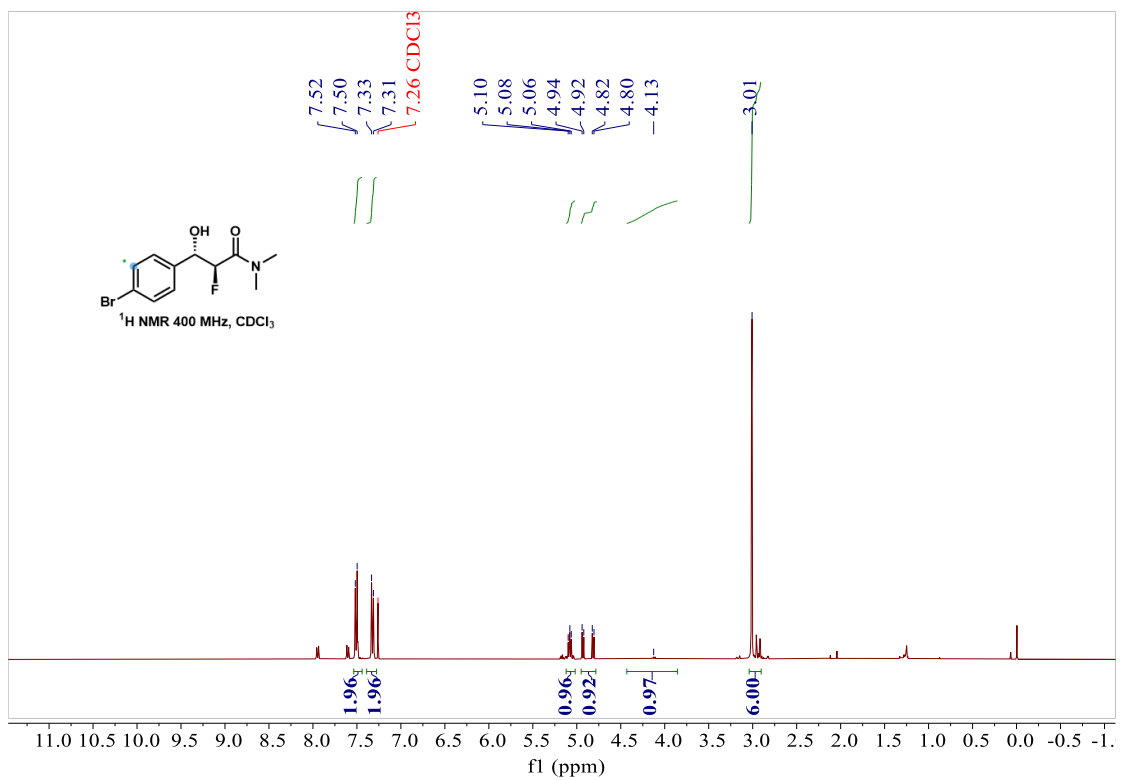

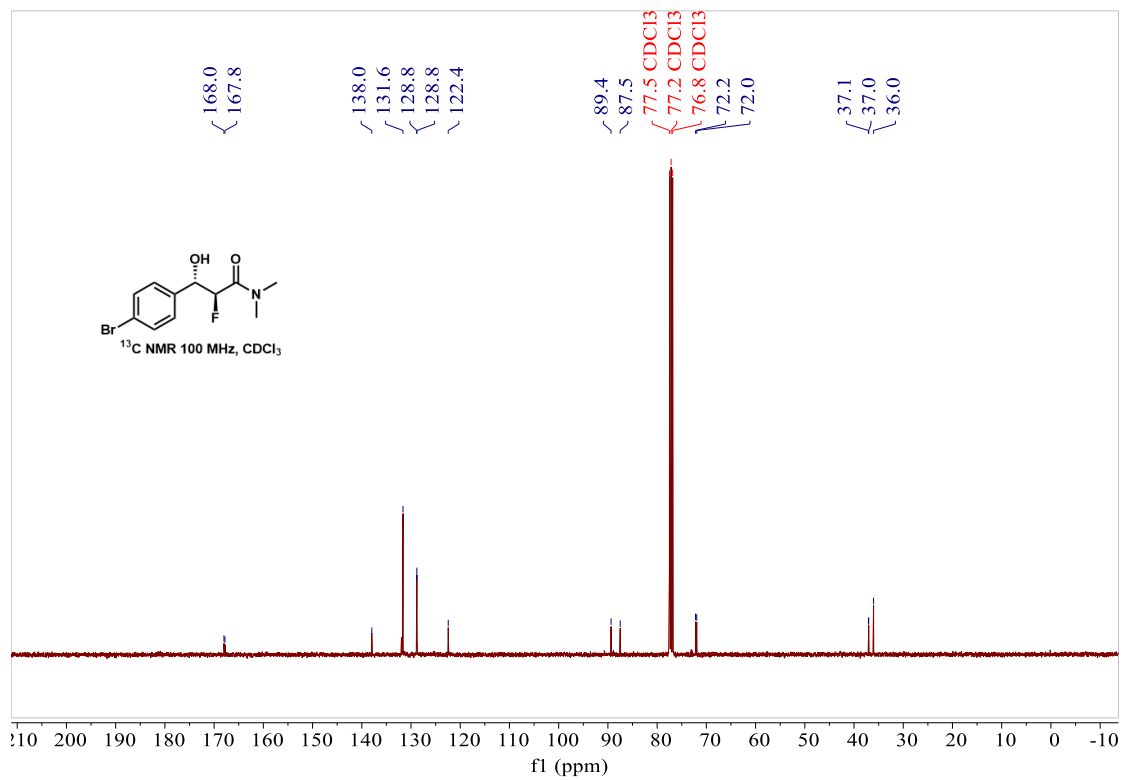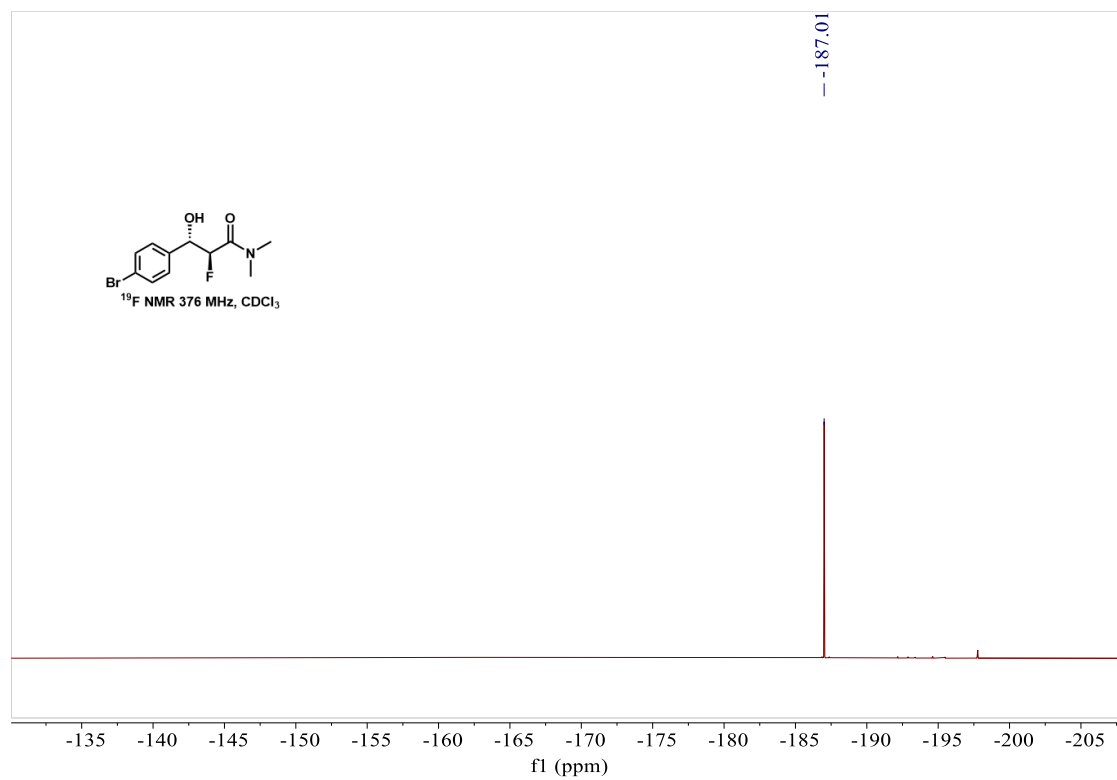

**(2*S*,3*S*)-3-(3-bromophenyl)-2-fluoro-3-hydroxy-*N,N*-dimethylpropanamide (2c):**

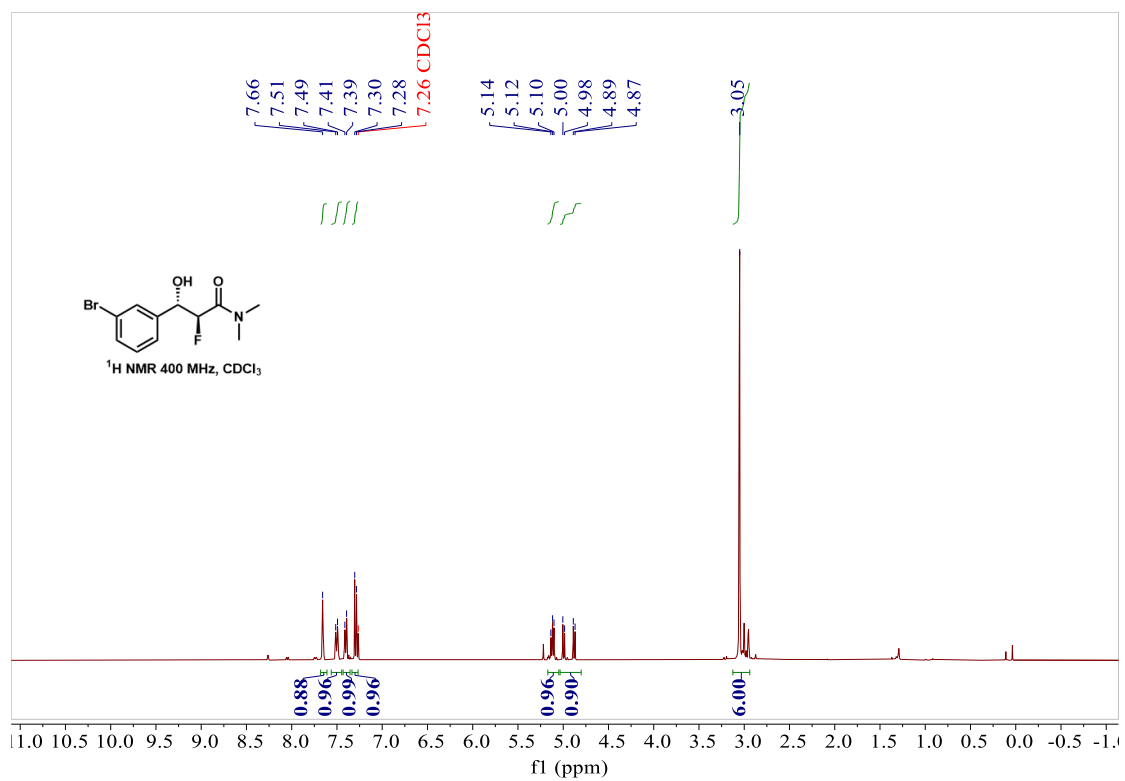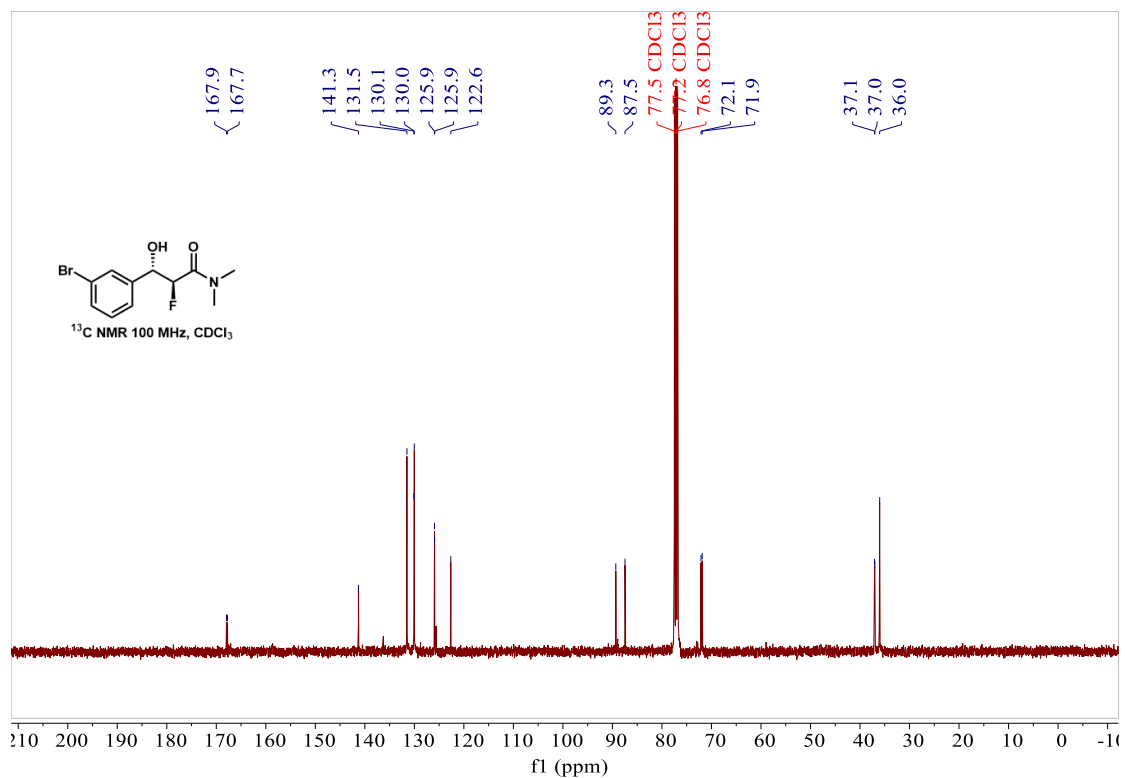

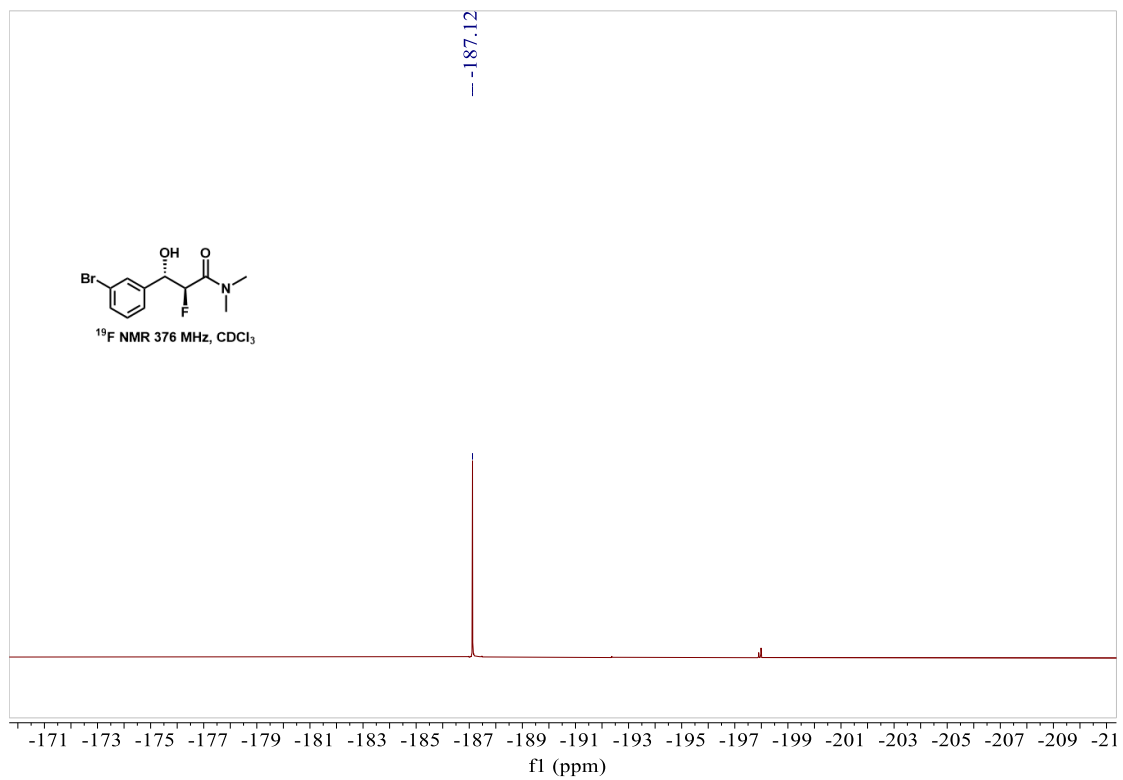

**(2*S*,3*S*)-3-(2-bromophenyl)-2-fluoro-3-hydroxy-*N,N*-dimethylpropanamide (2d):**

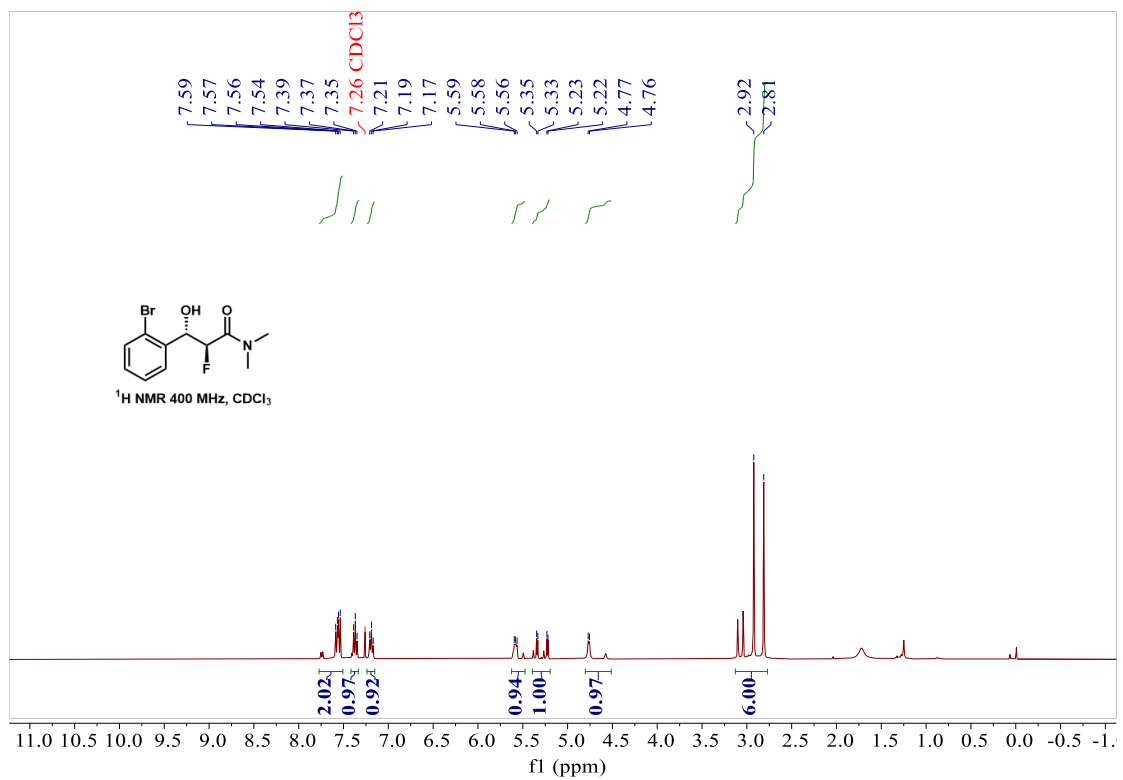

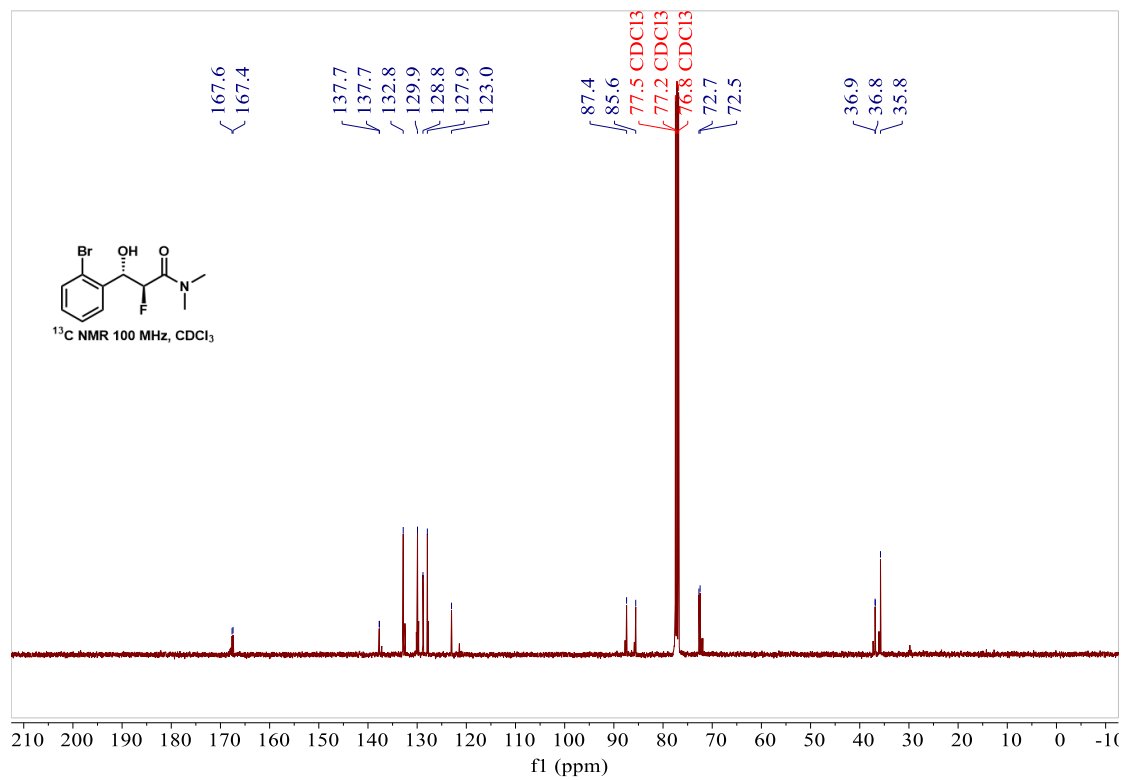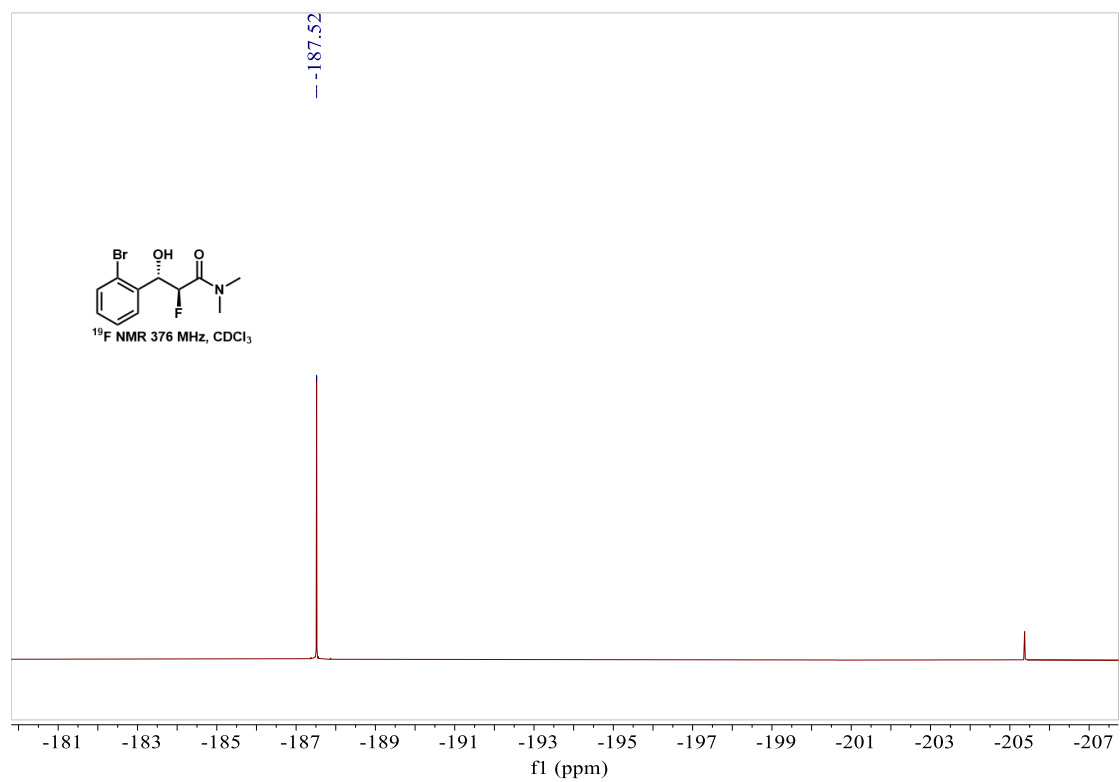



**(2*S*,3*S*)-2-fluoro-3-(4-fluorophenyl)-3-hydroxy-*N,N*-dimethylpropanamide (2e):**

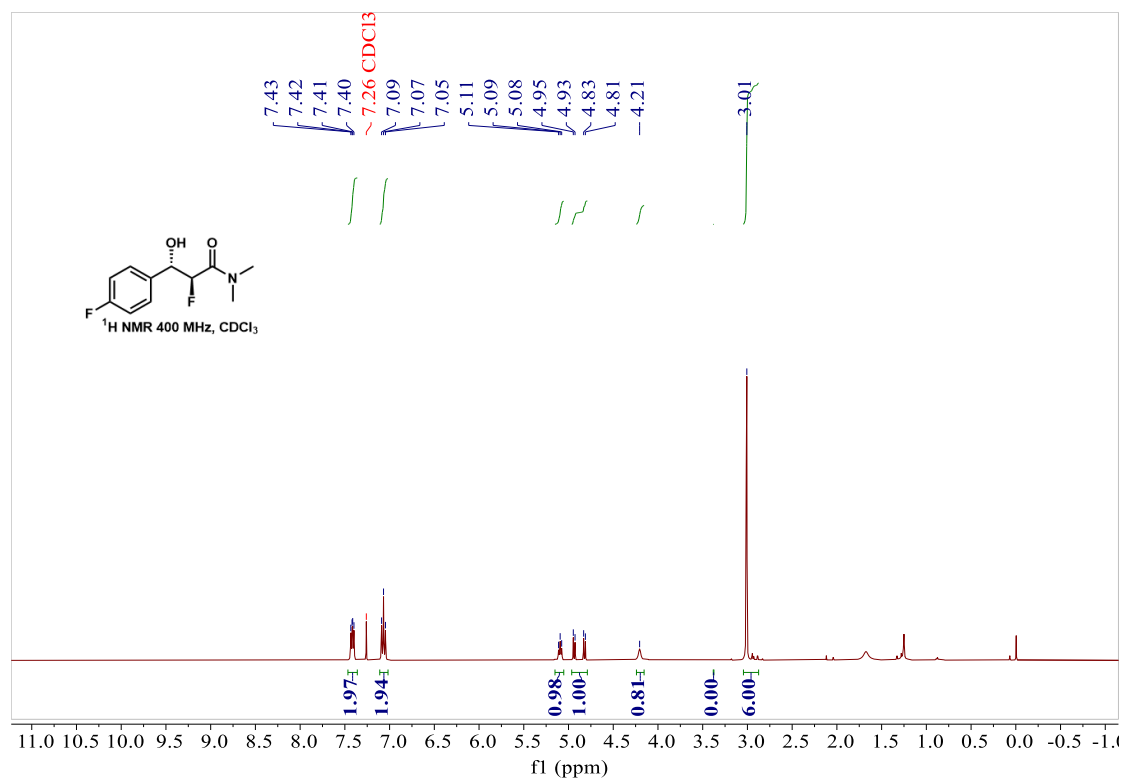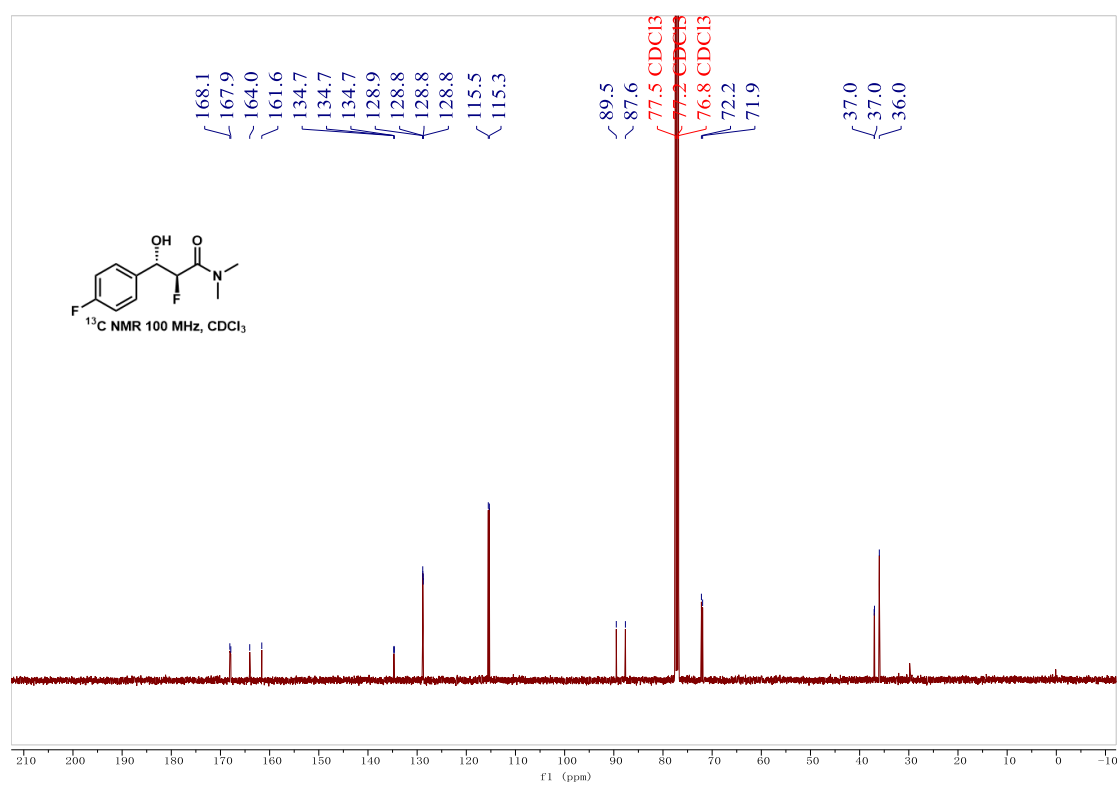

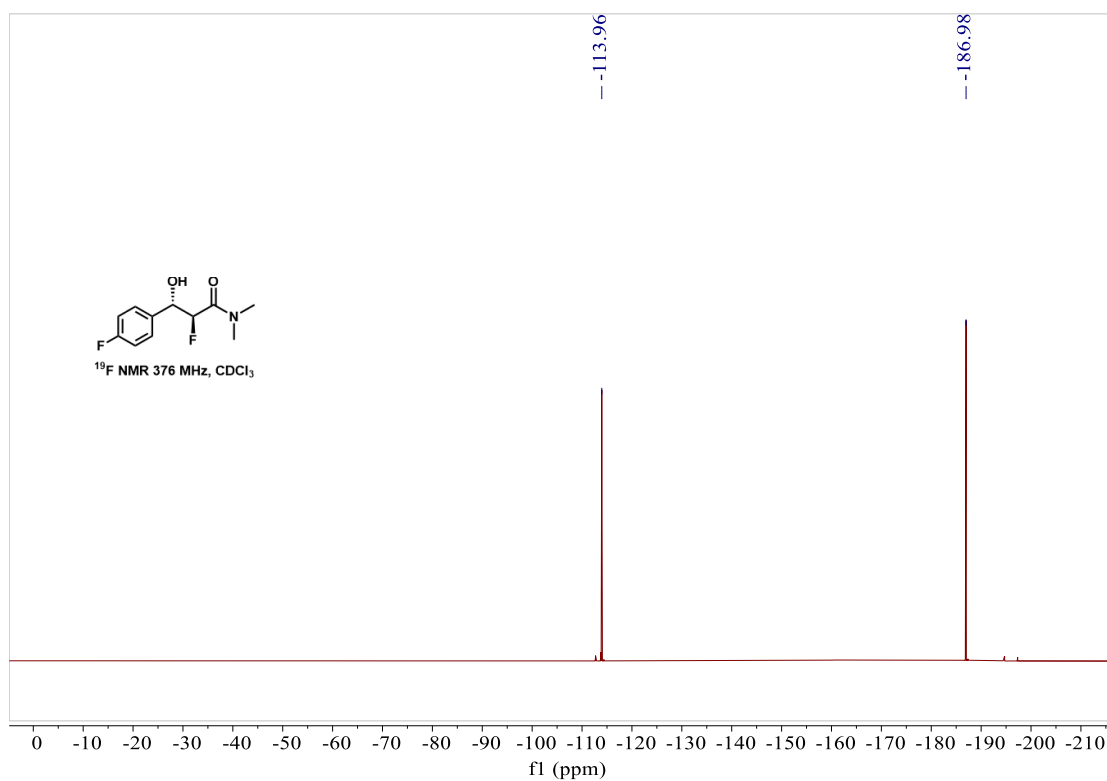

**(2*S*,3*S*)-2-fluoro-3-hydroxy-*N,N*-dimethyl-3-(4-(trifluoromethyl)phenyl)propanamide (2f):**

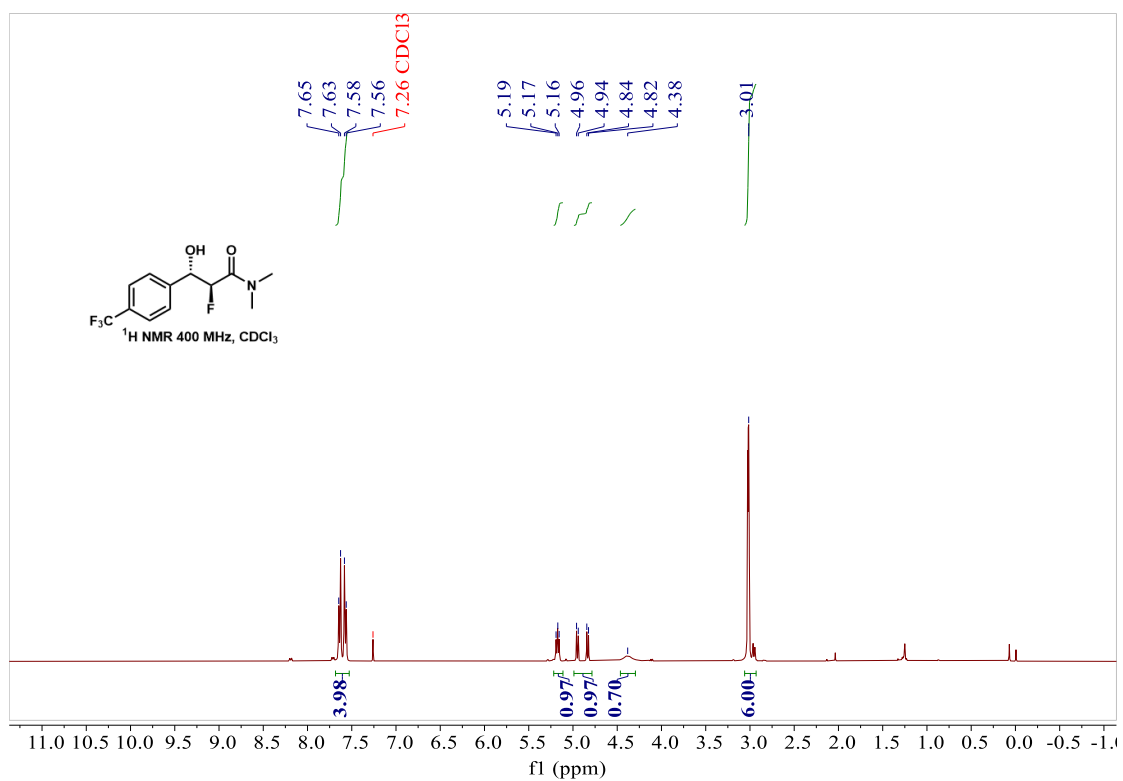

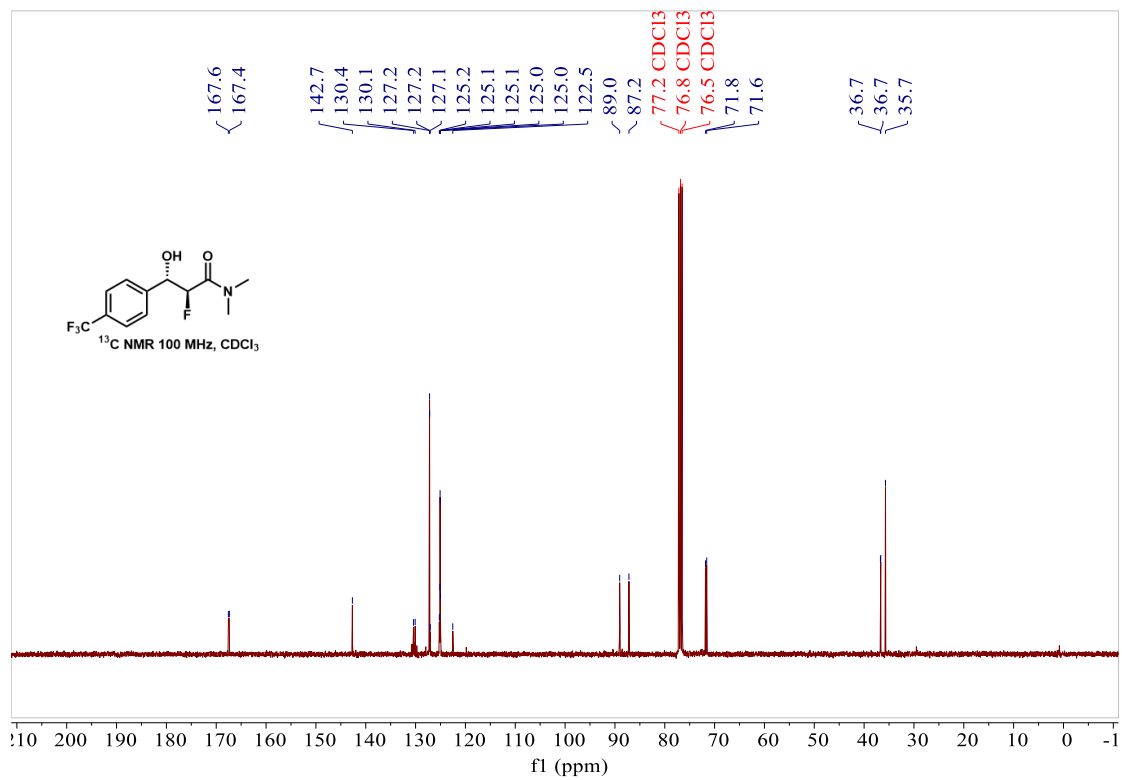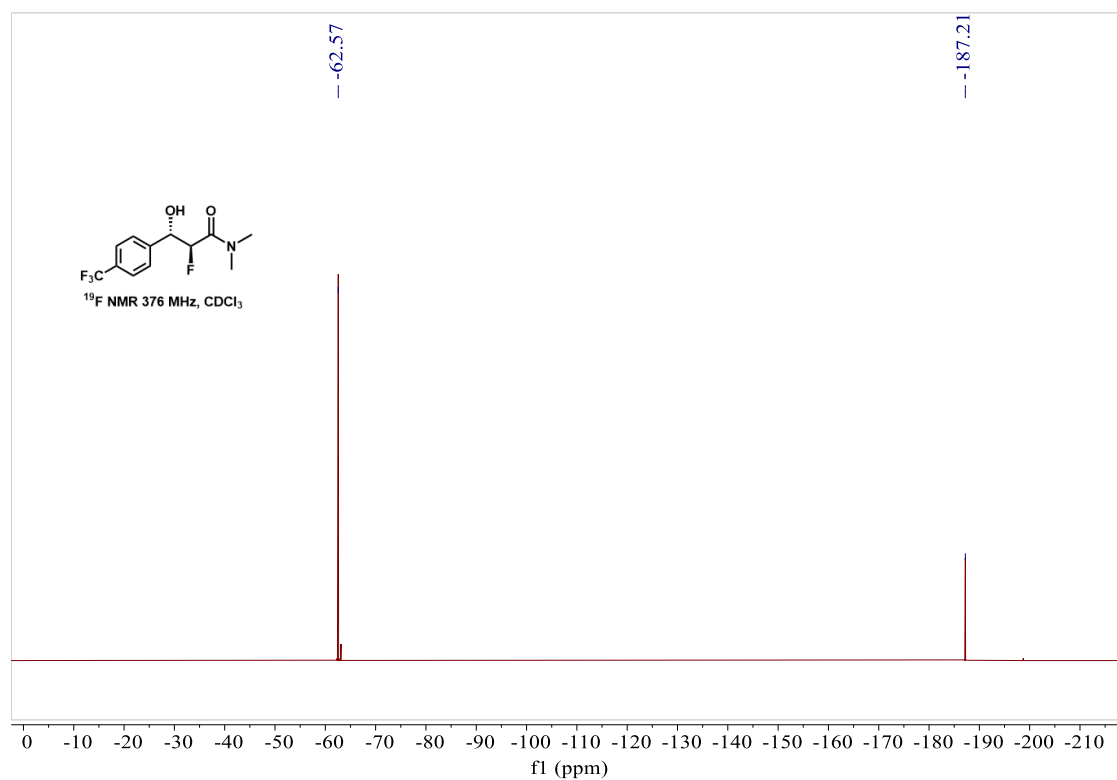

**(2*S*,3*S*)-3-(4-cyanophenyl)-2-fluoro-3-hydroxy-*N,N*-dimethylpropanamide (2g):**

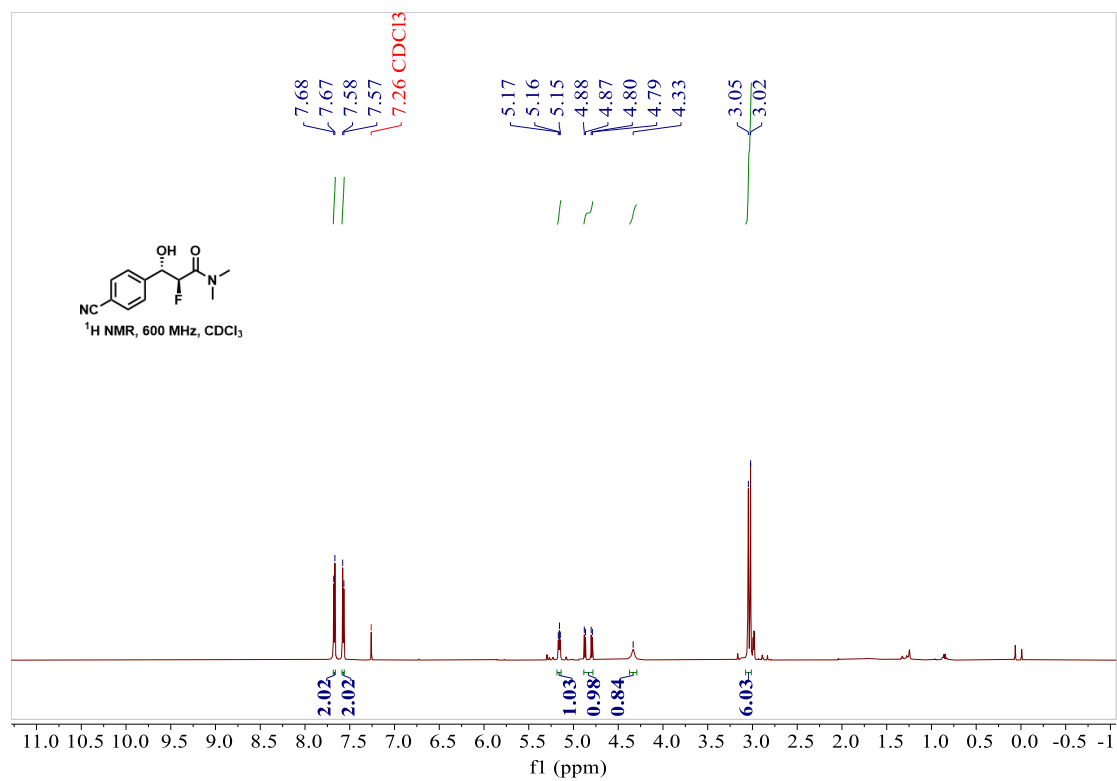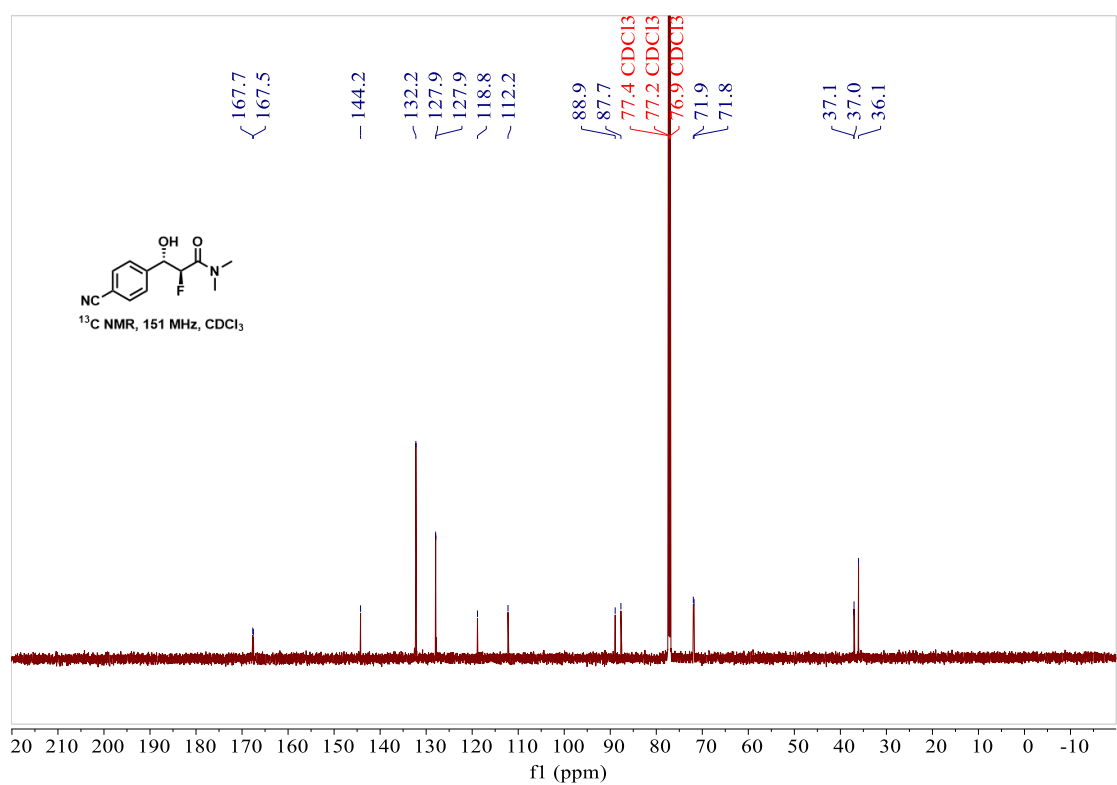

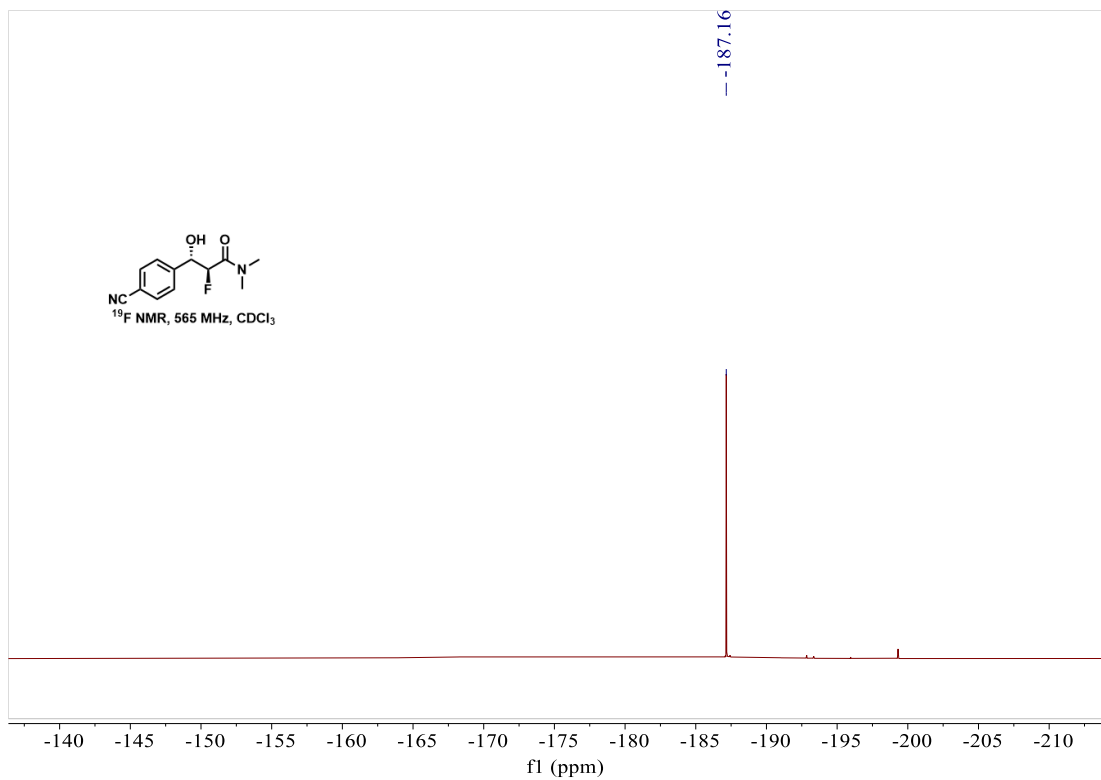

**(2S,3S)-2-fluoro-3-hydroxy-N,N-dimethyl-3-(4-nitrophenyl)propenamide (2h):**

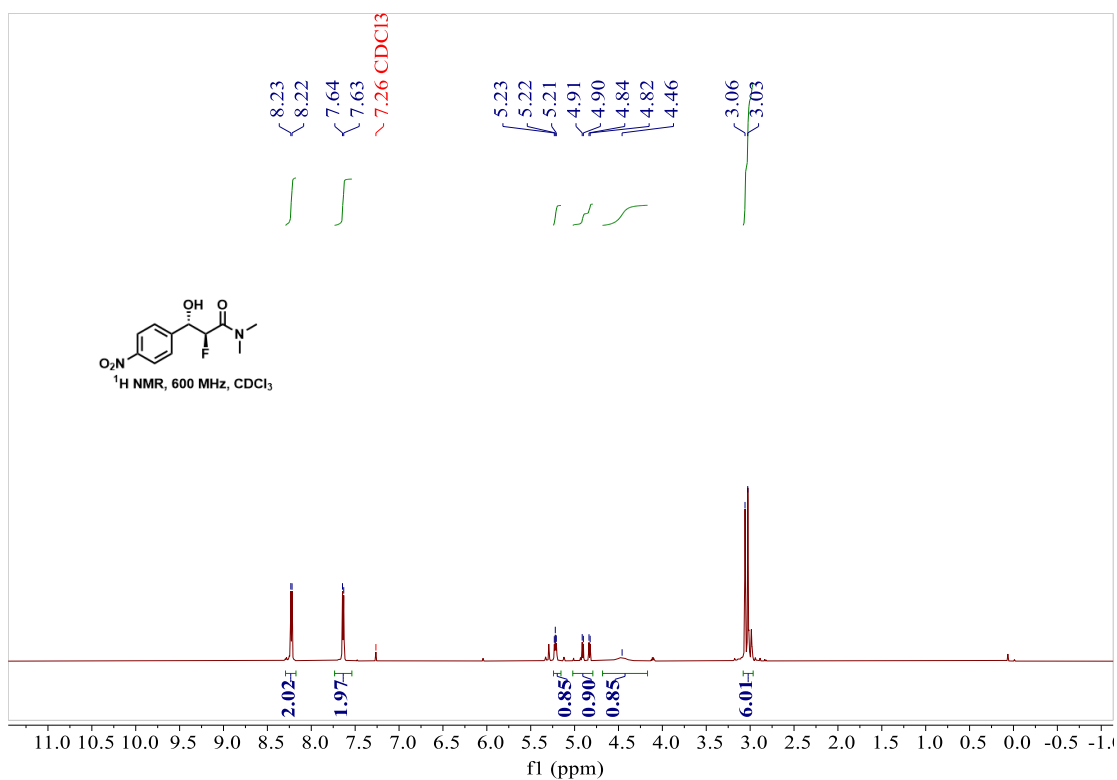

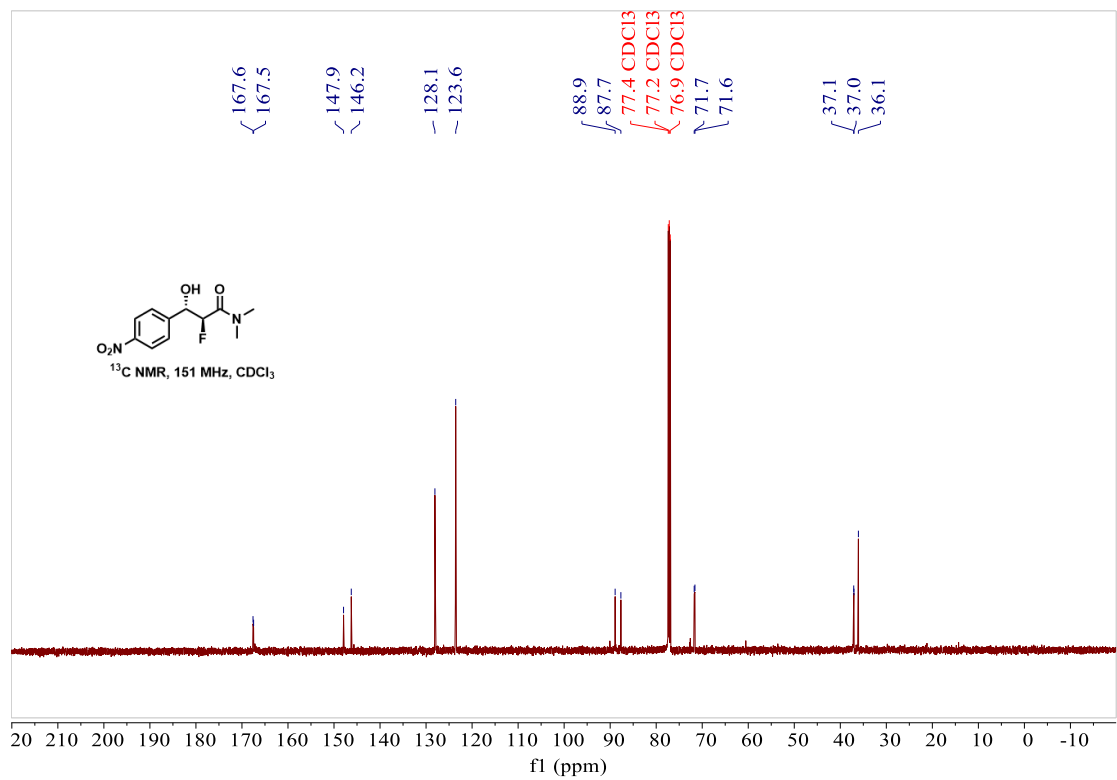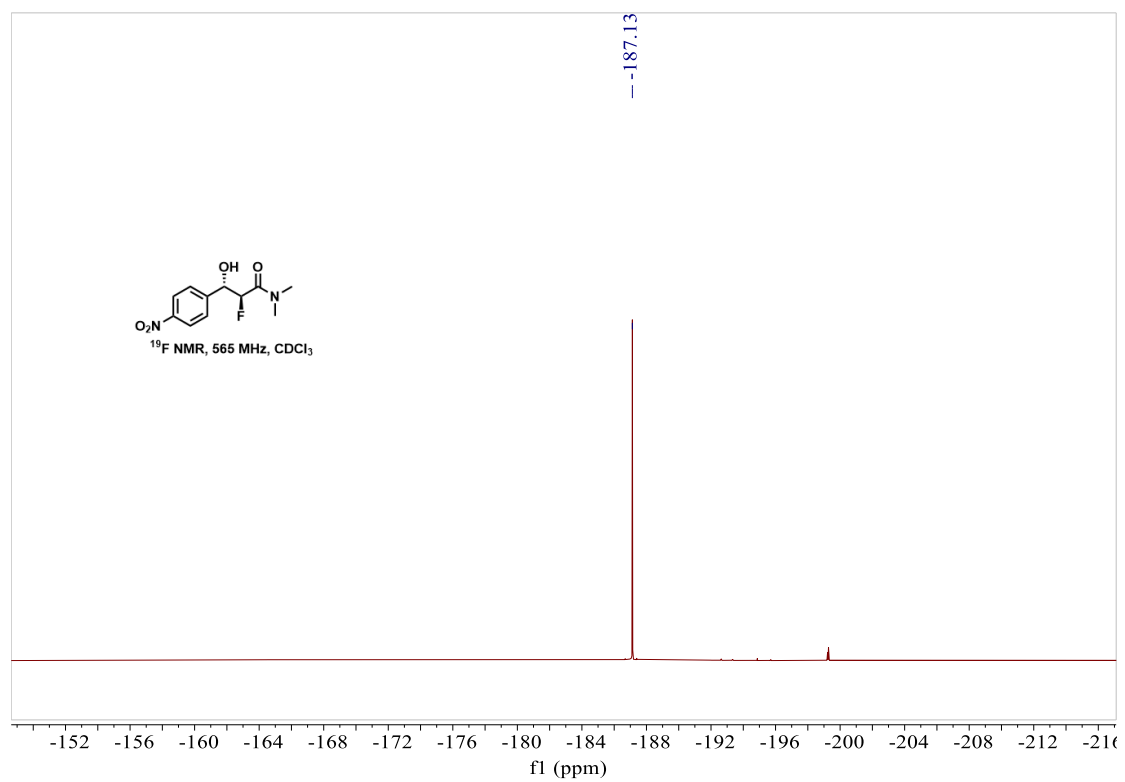

**(2*S*,3*S*)-3-(4-chlorophenyl)-2-fluoro-3-hydroxy-*N,N*-dimethylpropanamide (2i):**

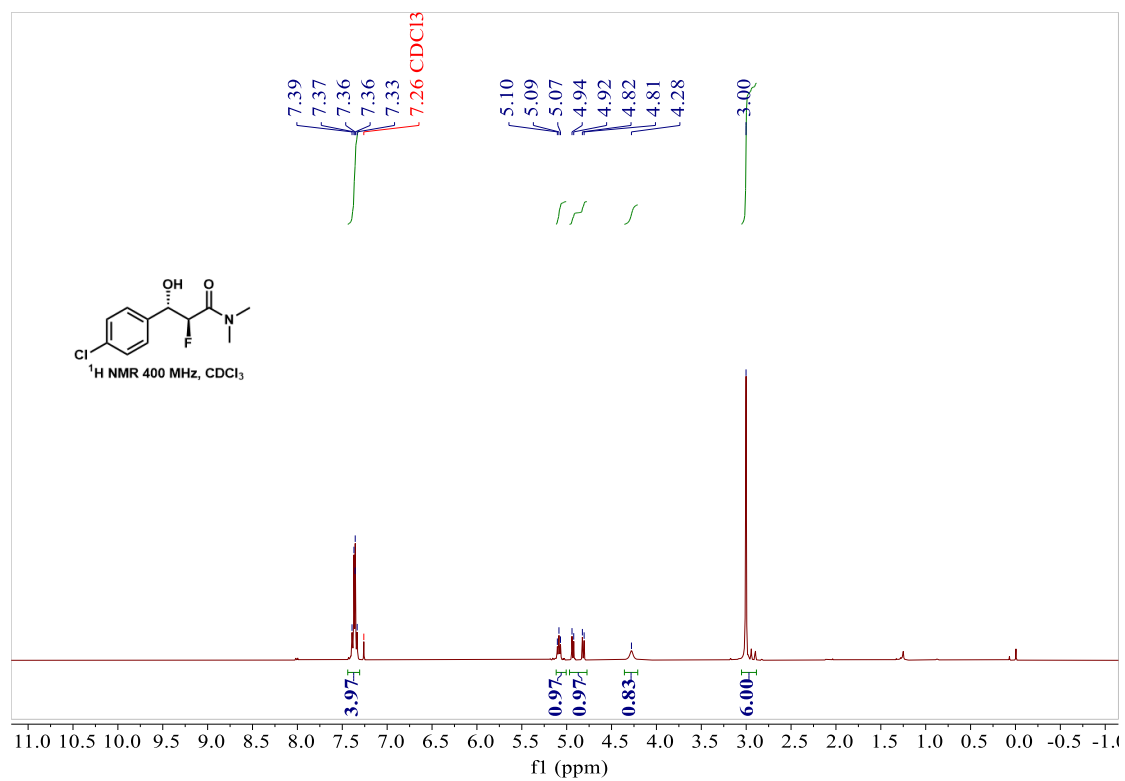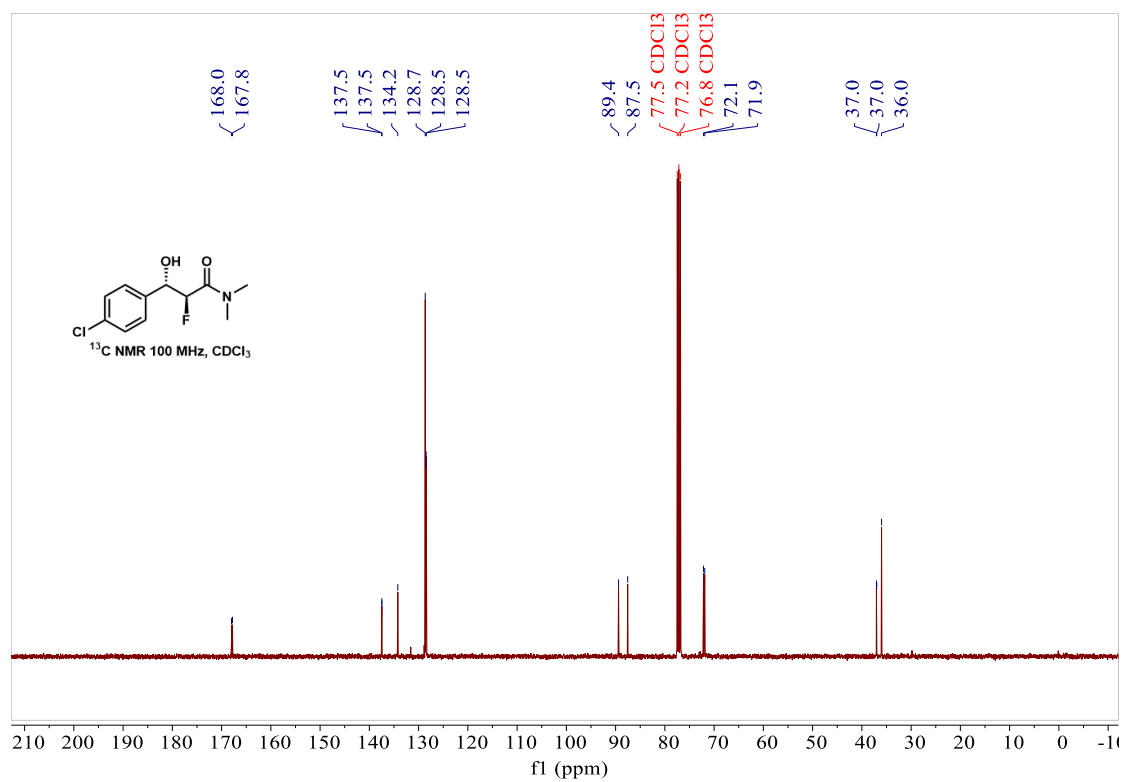

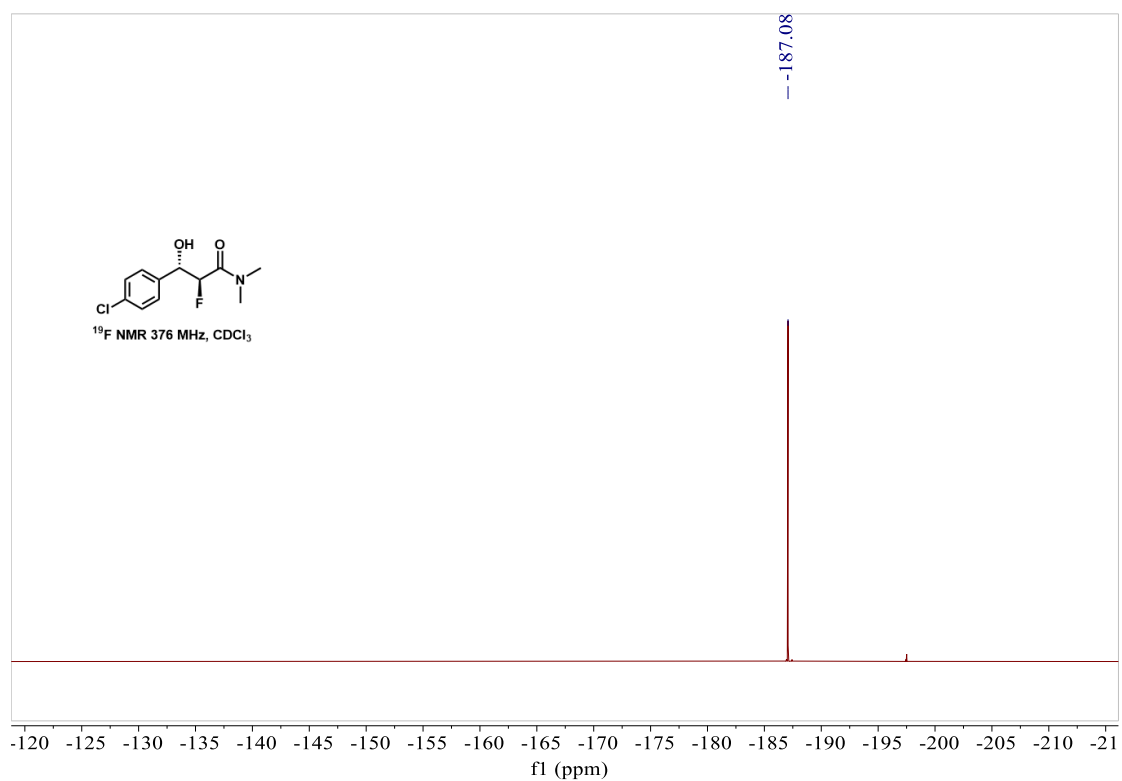

**(2S,3S)-2-fluoro-3-hydroxy-N,N-dimethyl-3-(p-tolyl)propanamide (2j):**

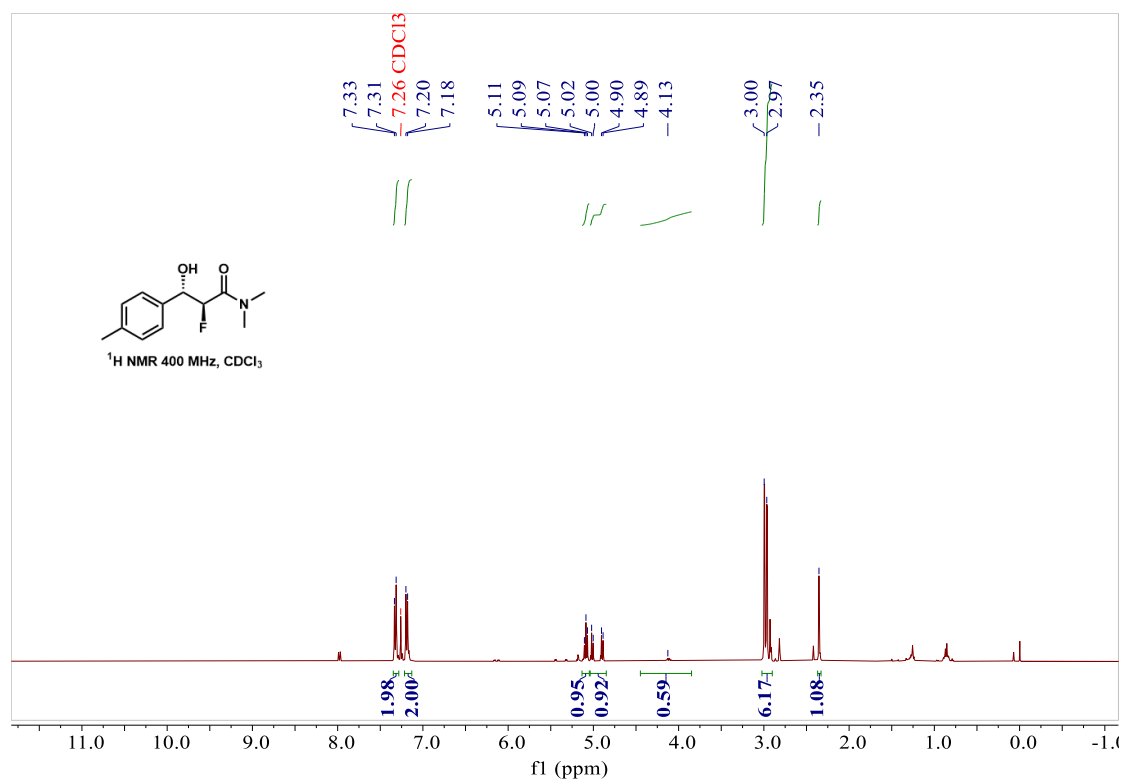



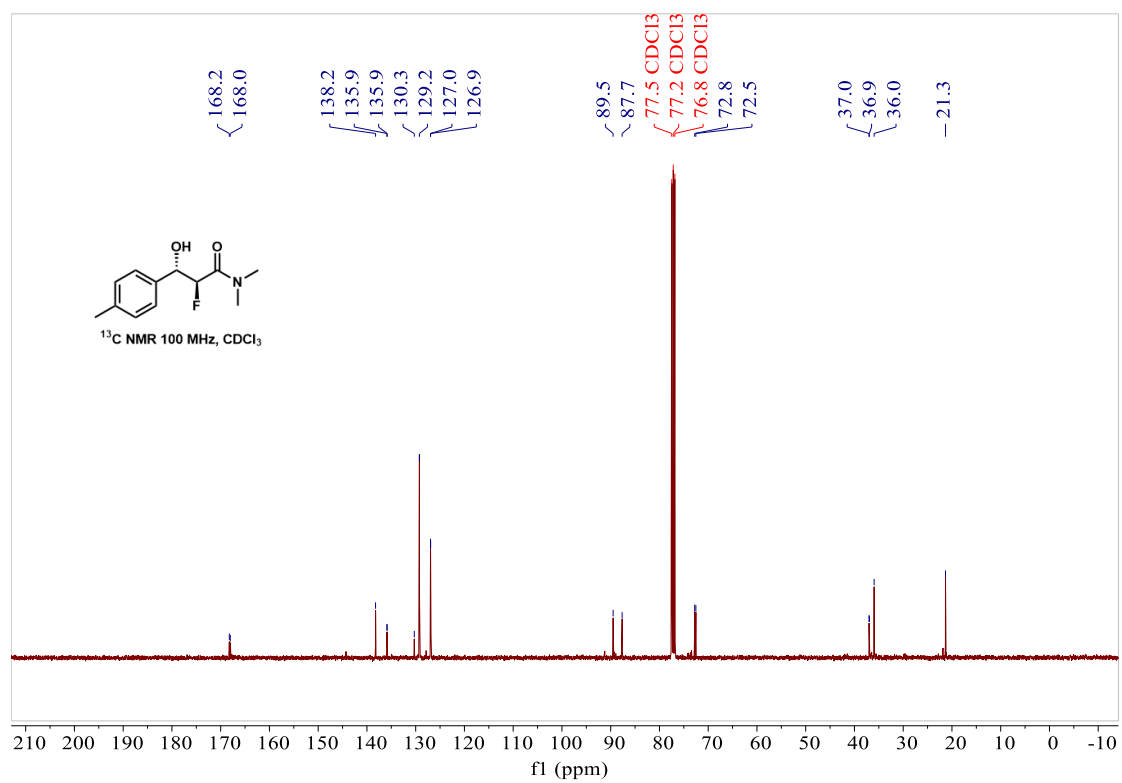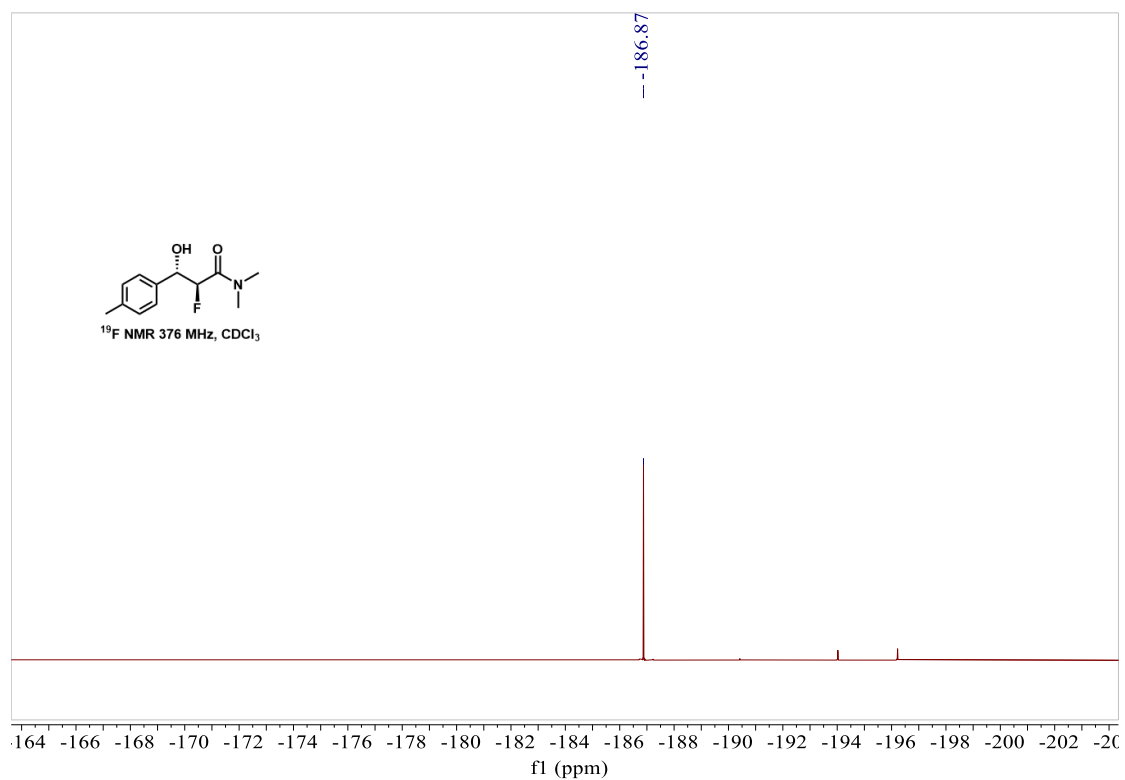

**(2S,3S)-2-fluoro-3-hydroxy-N,N-dimethyl-3-(*m*-tolyl)propanamide (2k):**

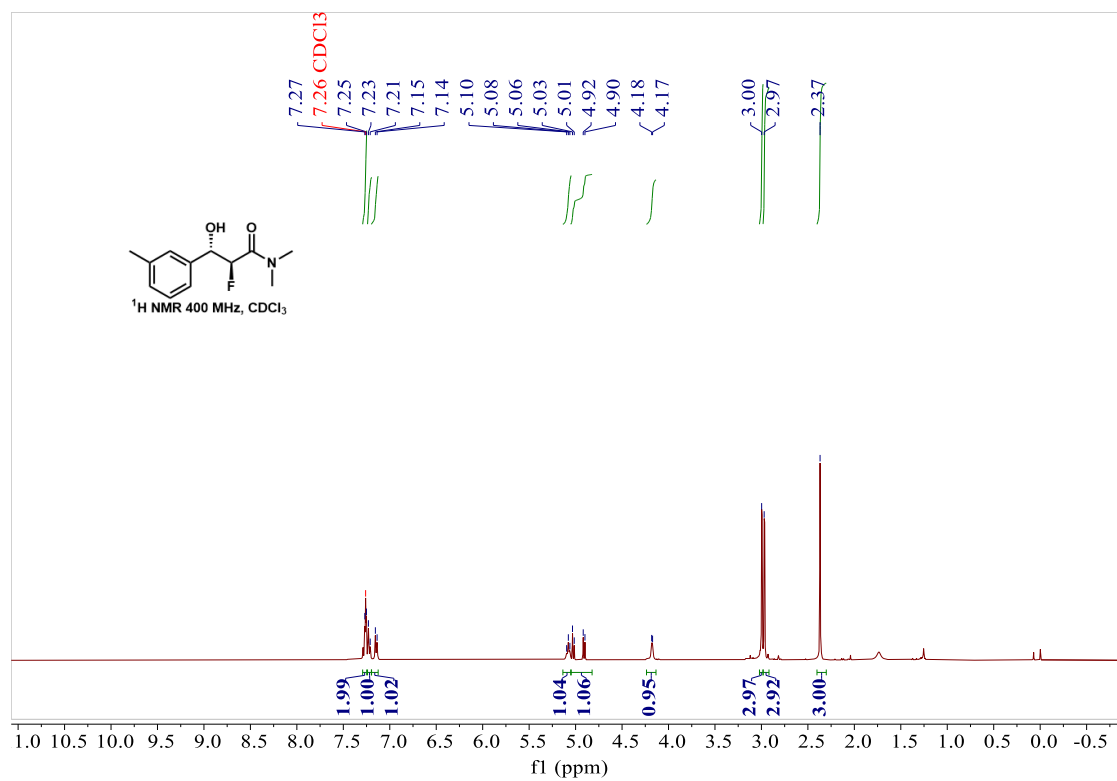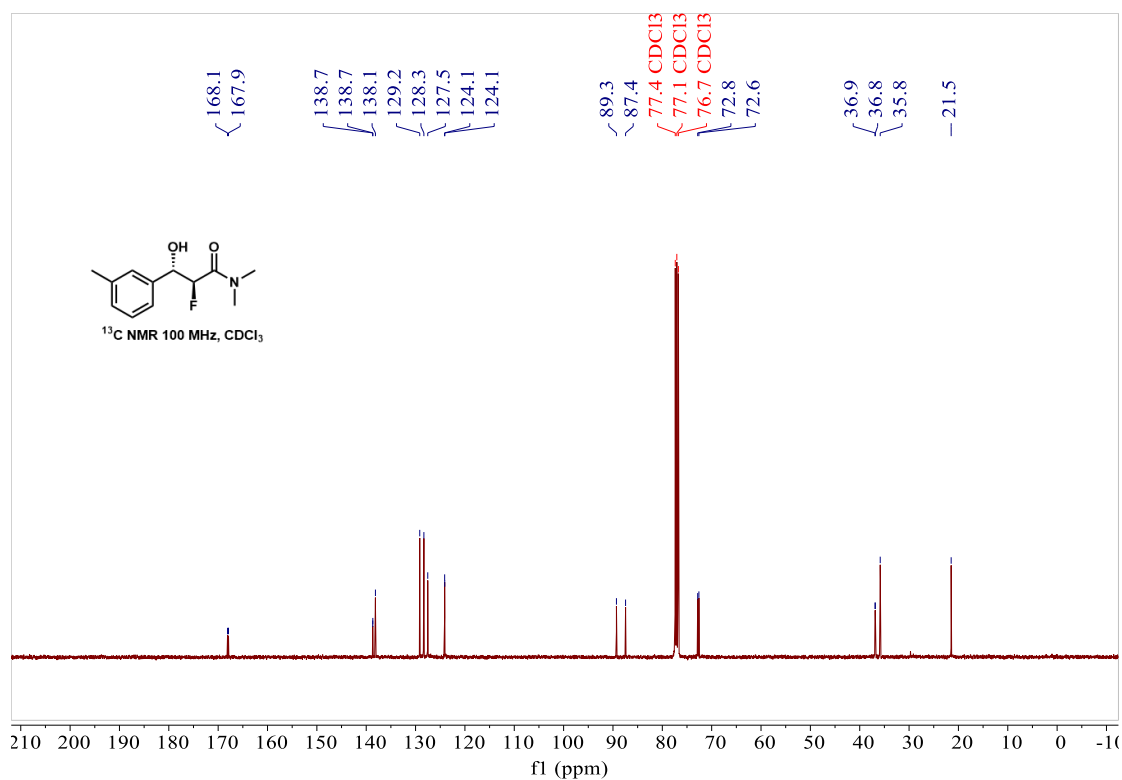

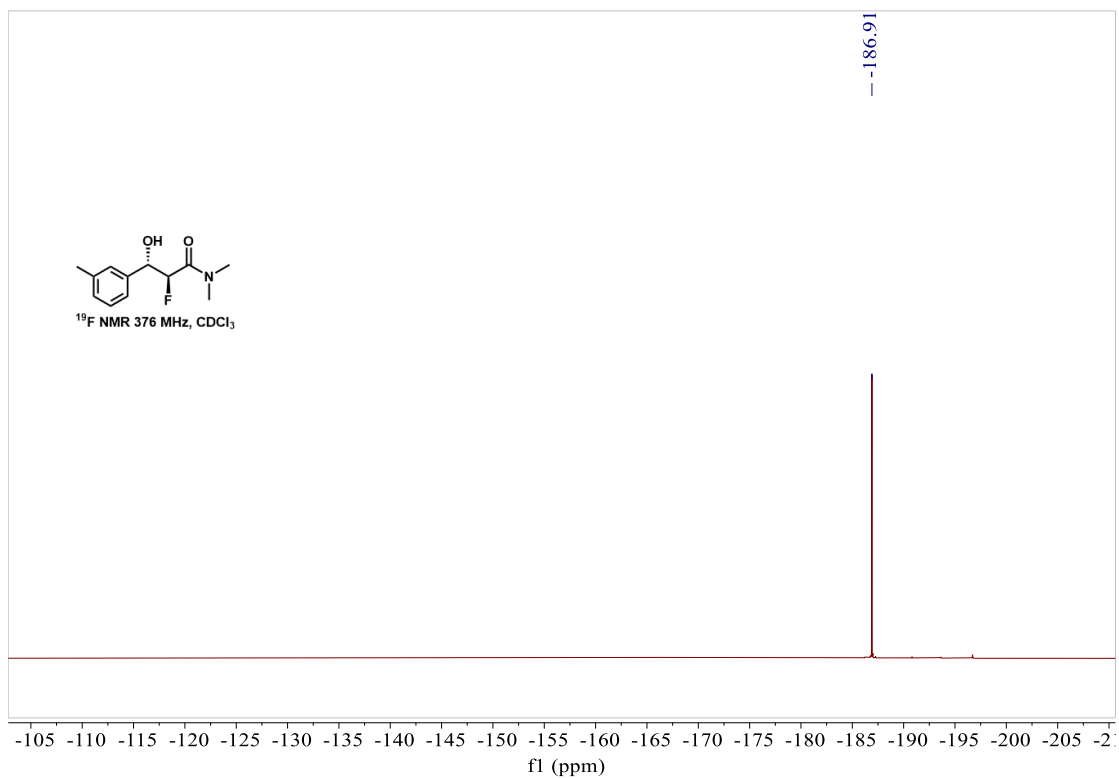

**(2S,3S)-2-fluoro-3-hydroxy-N,N-dimethyl-3-(*o*-tolyl)propanamide (2l):**

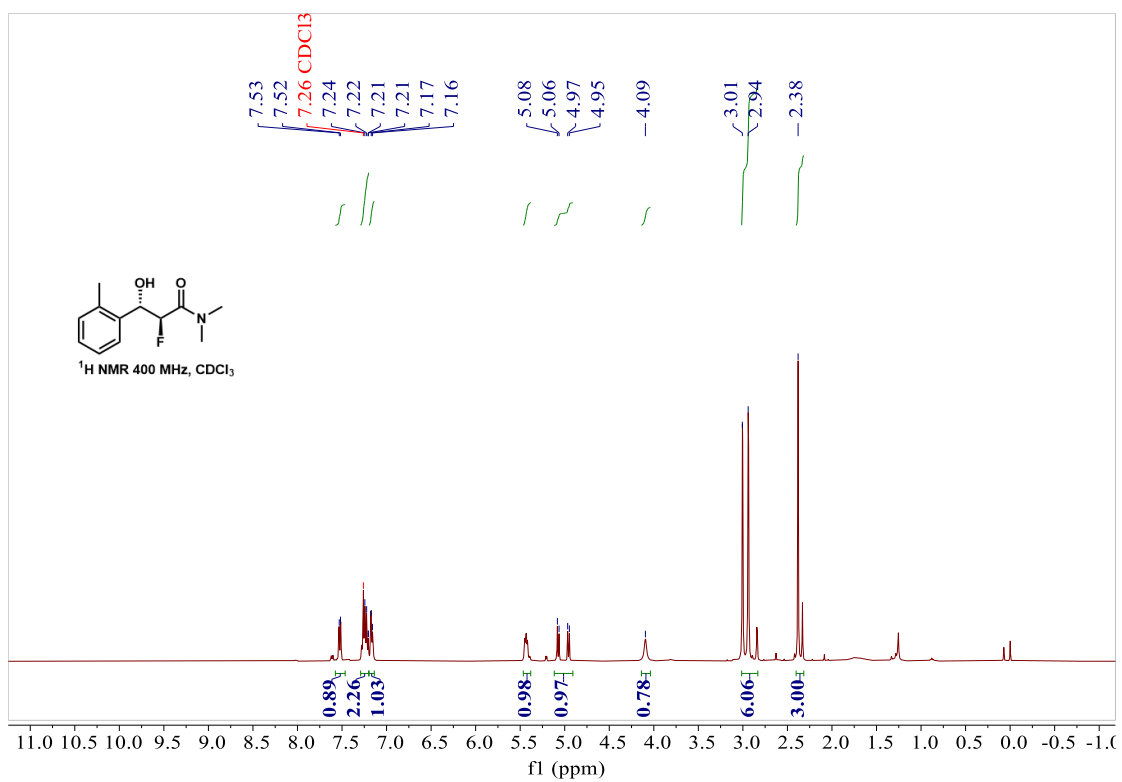

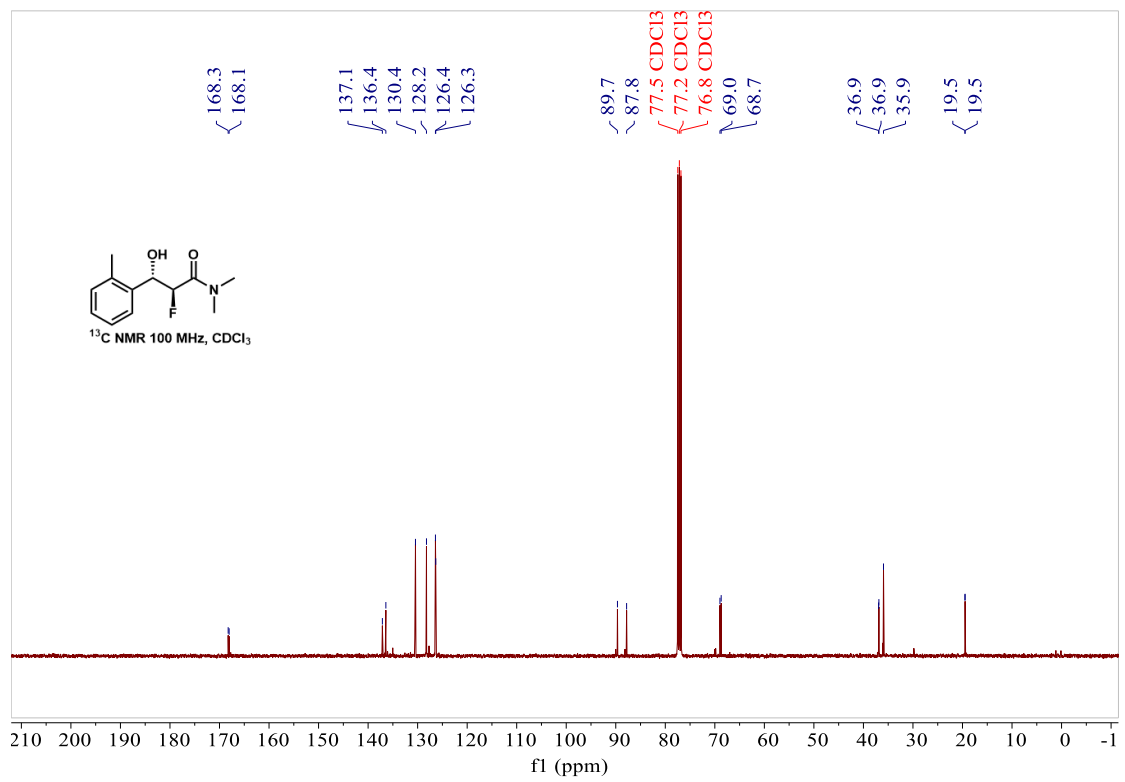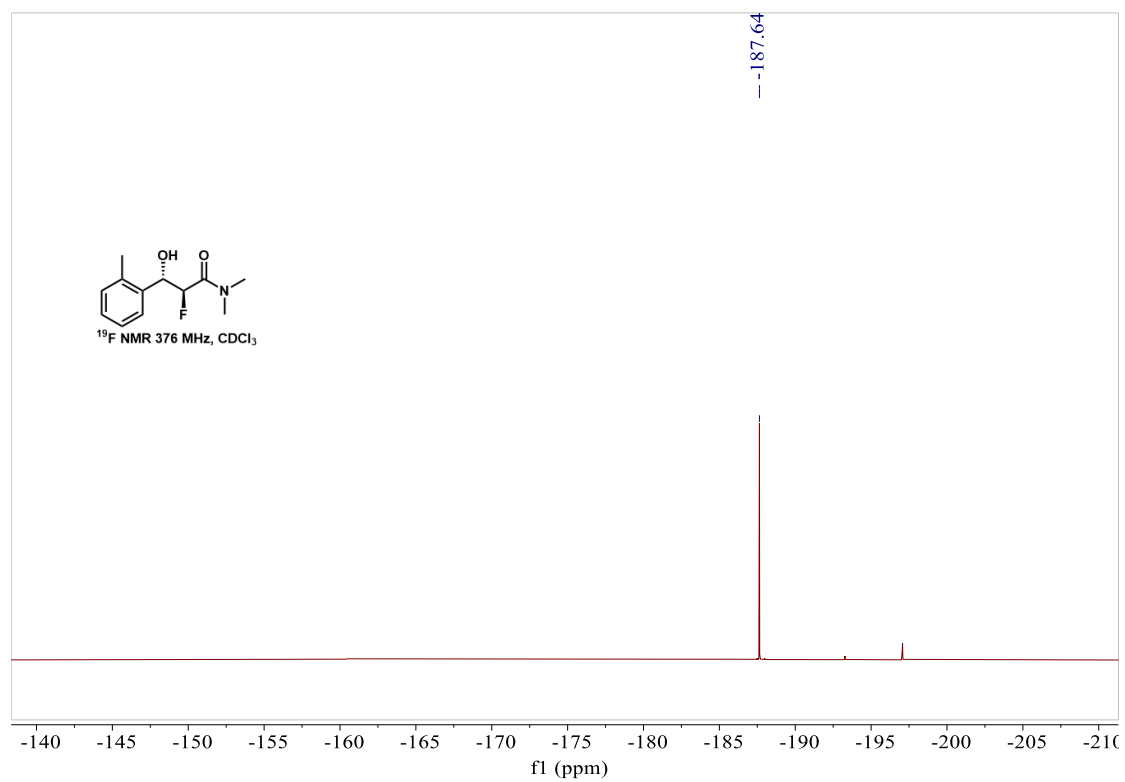

**(2*S*,3*S*)-2-fluoro-3-hydroxy-3-(4-methoxyphenyl)-*N,N*-dimethylpropanamide**

**(2m):**

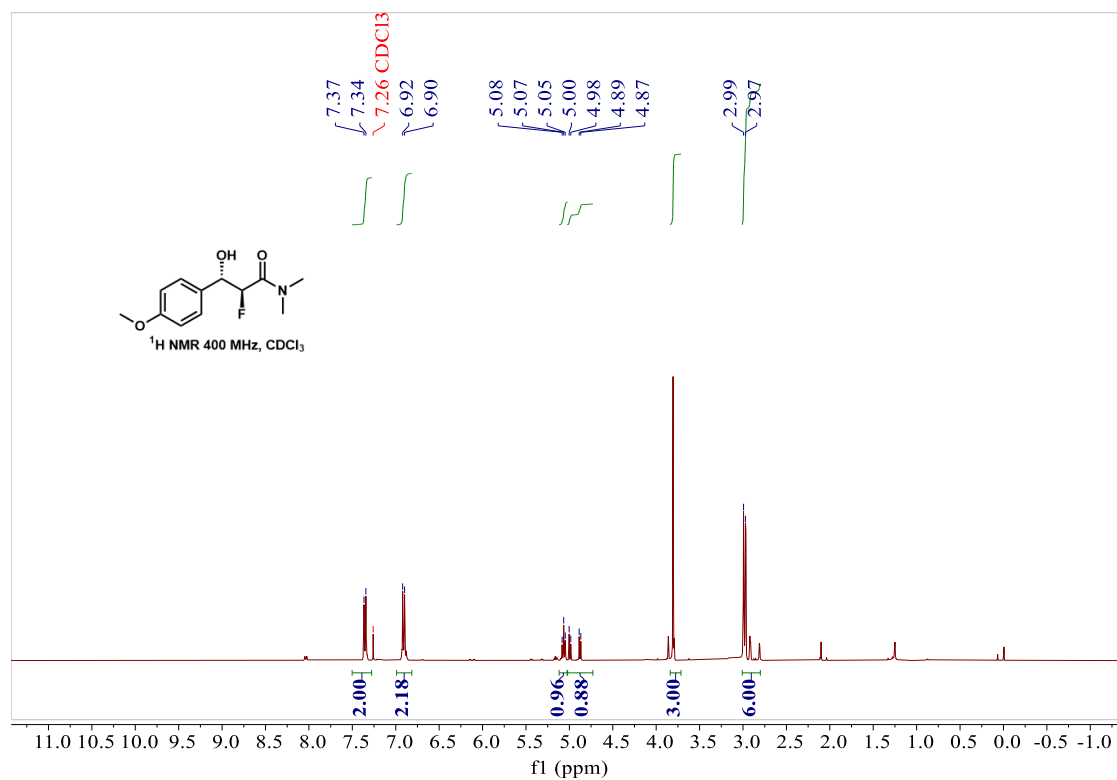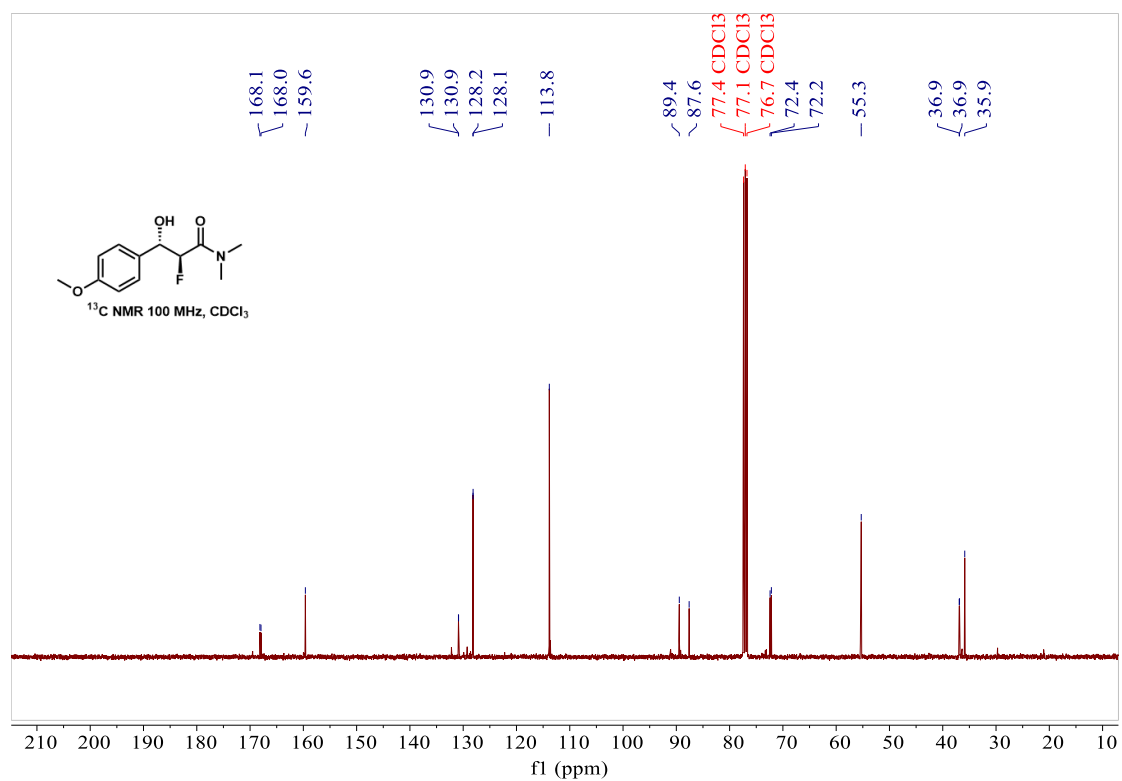

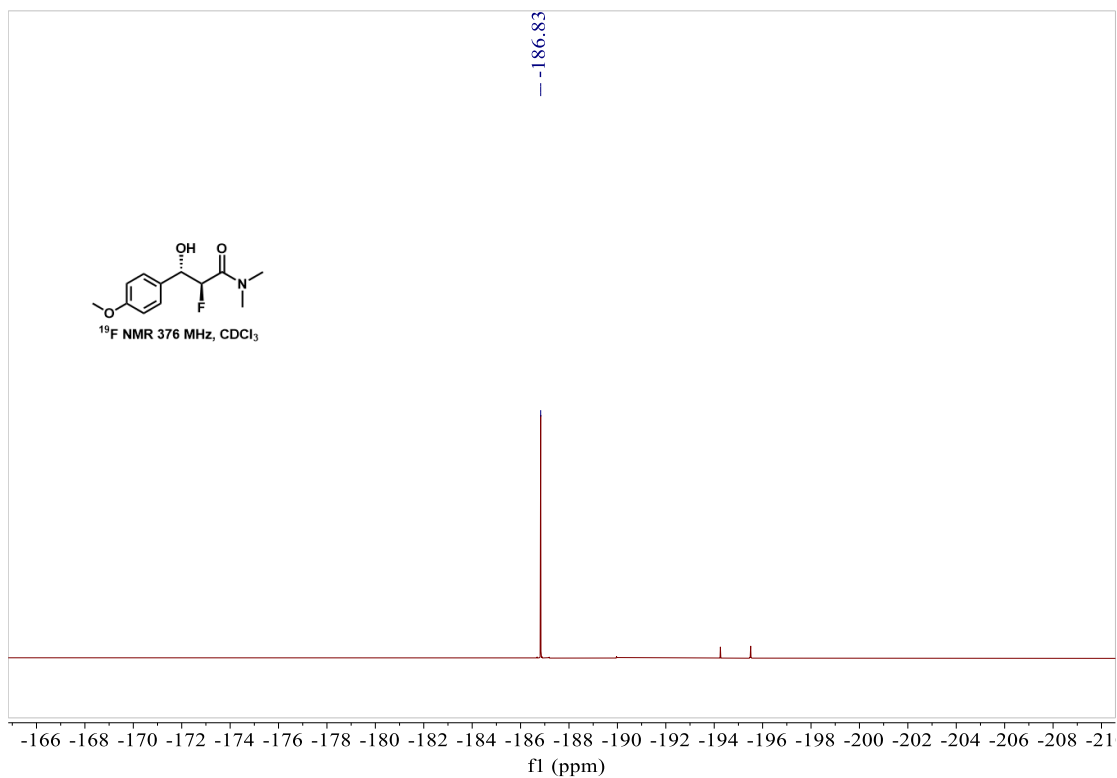

**(2*S*,3*S*)-3-(3,5-dimethylphenyl)-2-fluoro-3-hydroxy-*N,N*-dimethylpropanamide**

**(2n):**

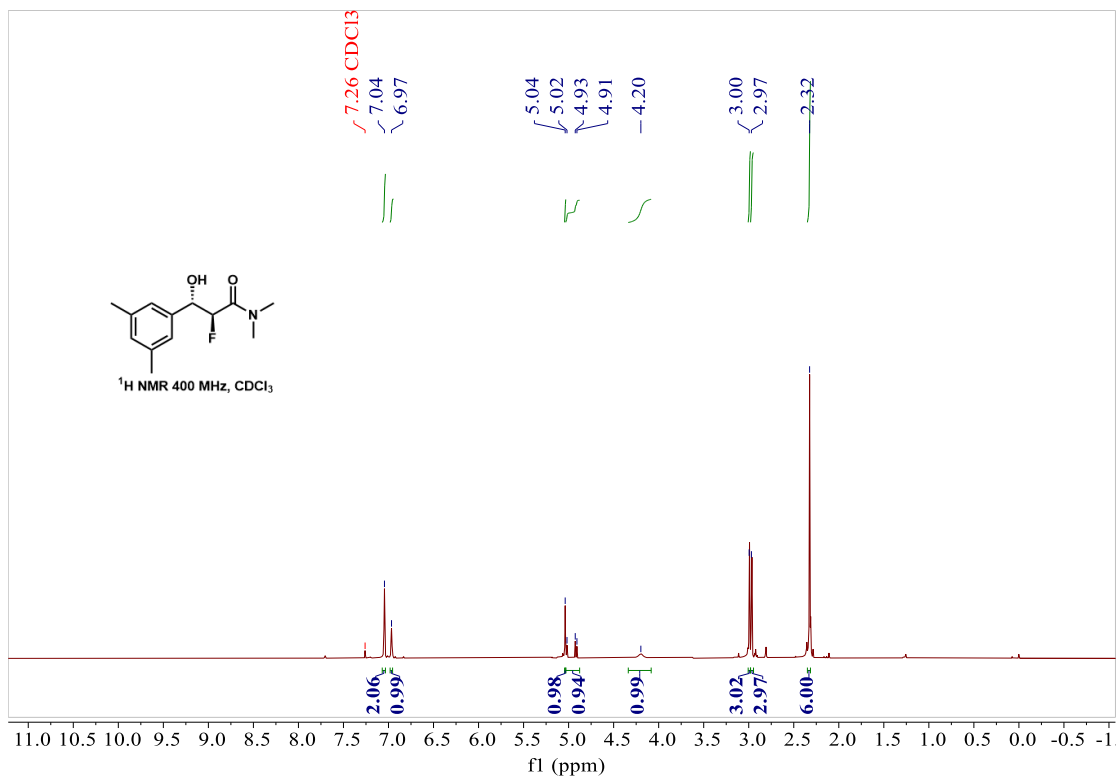

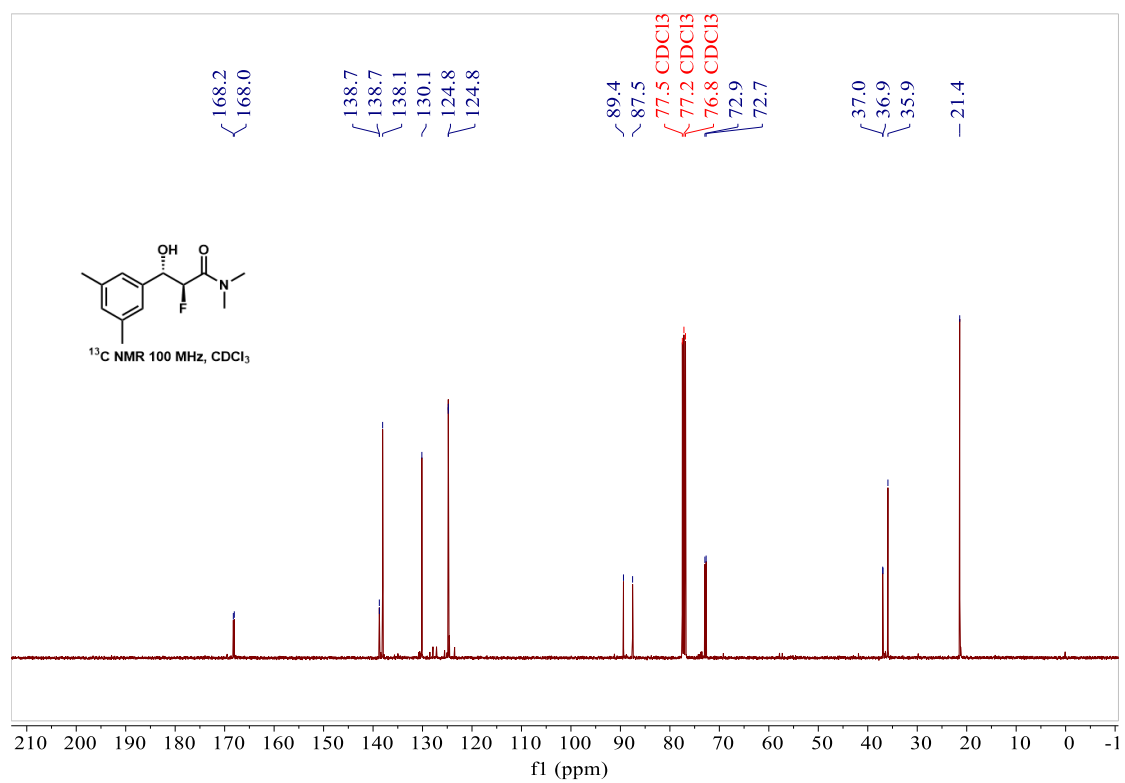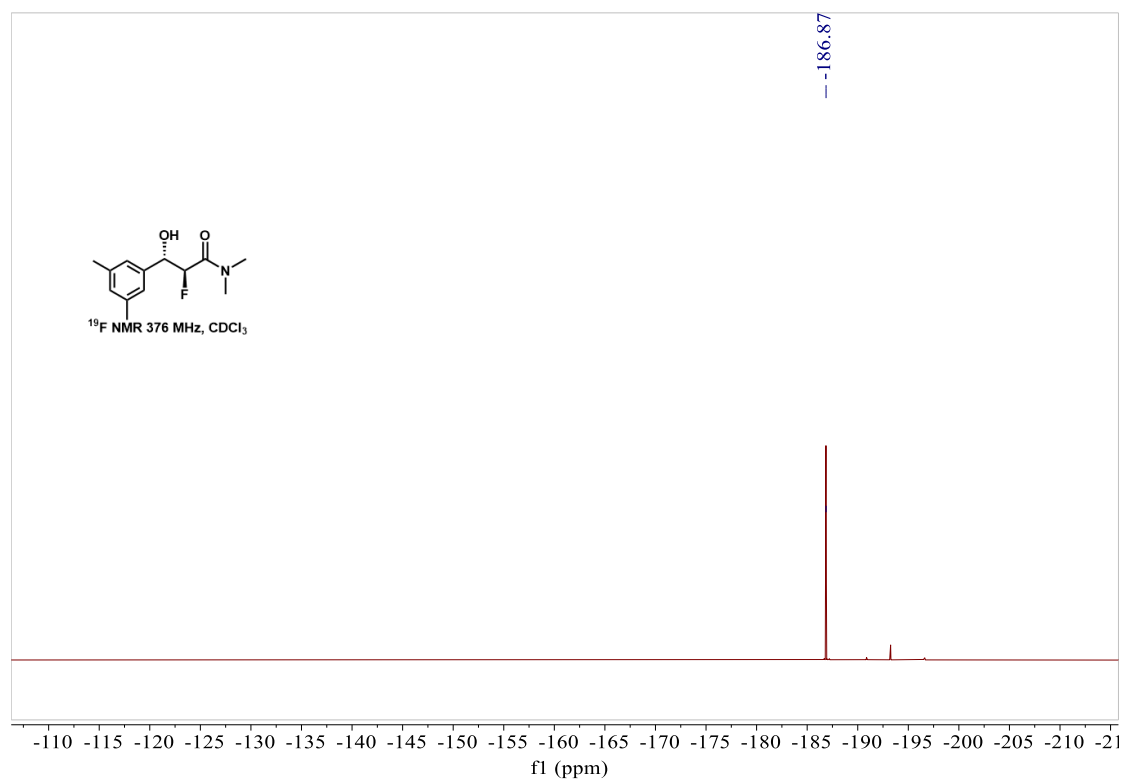

**(2S,3S)-N,N-diethyl-2-fluoro-3-hydroxy-3-phenylpropanamide (2o):**

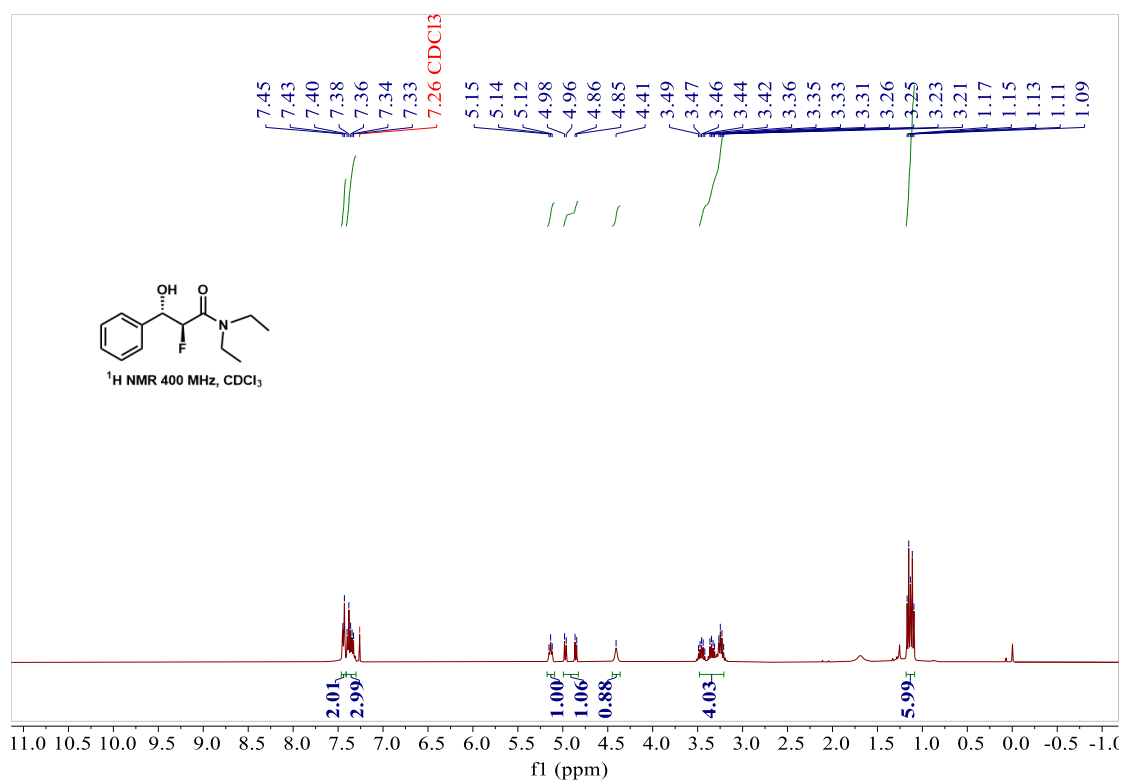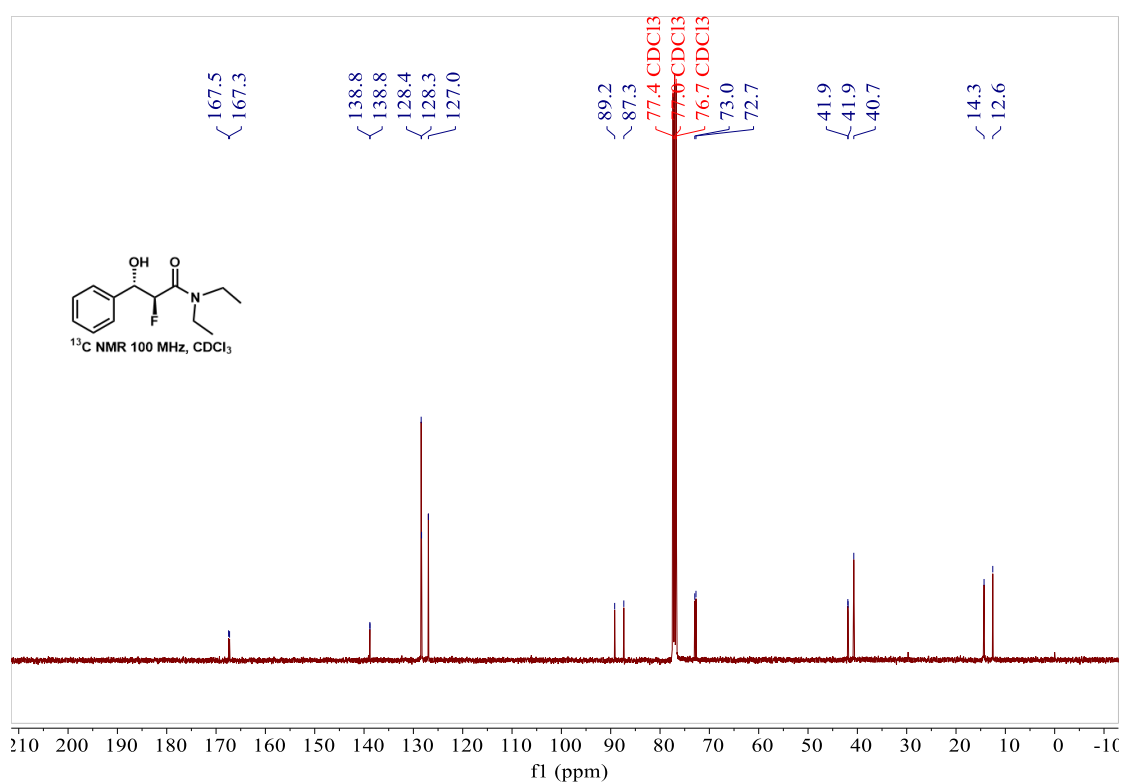



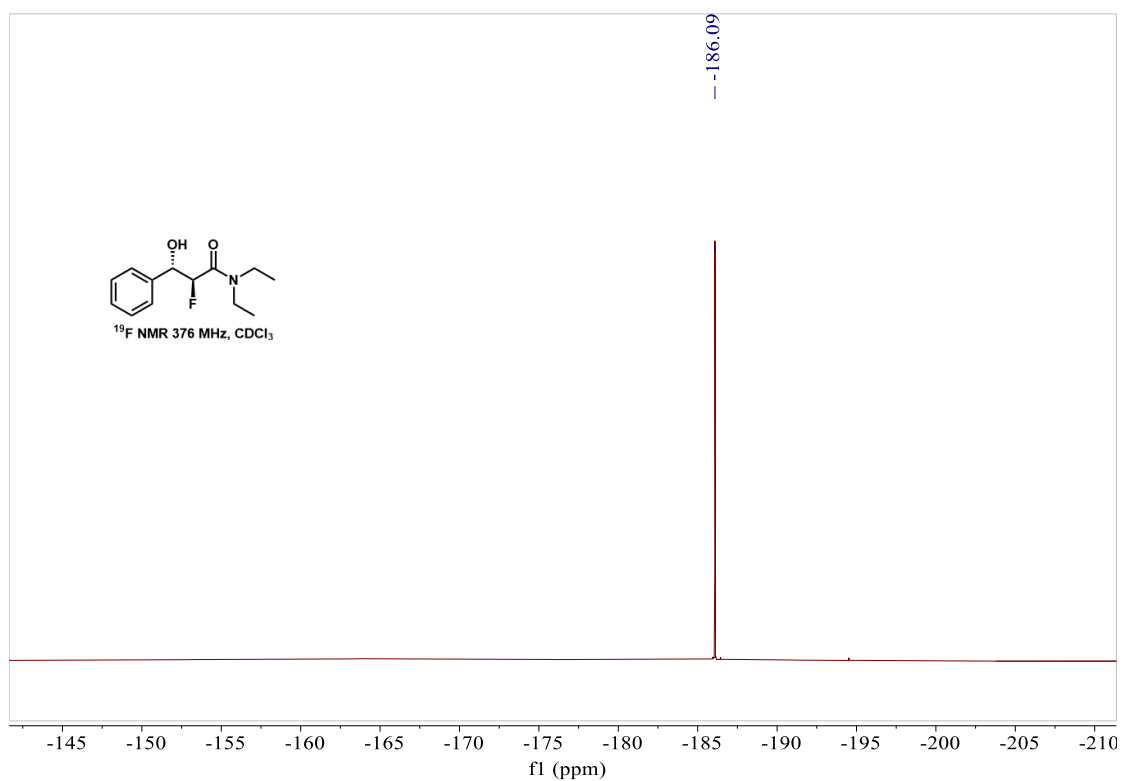

**(2S,3S)-2-fluoro-3-hydroxy-N,N-diisopropyl-3-phenylpropanamide (2p):**

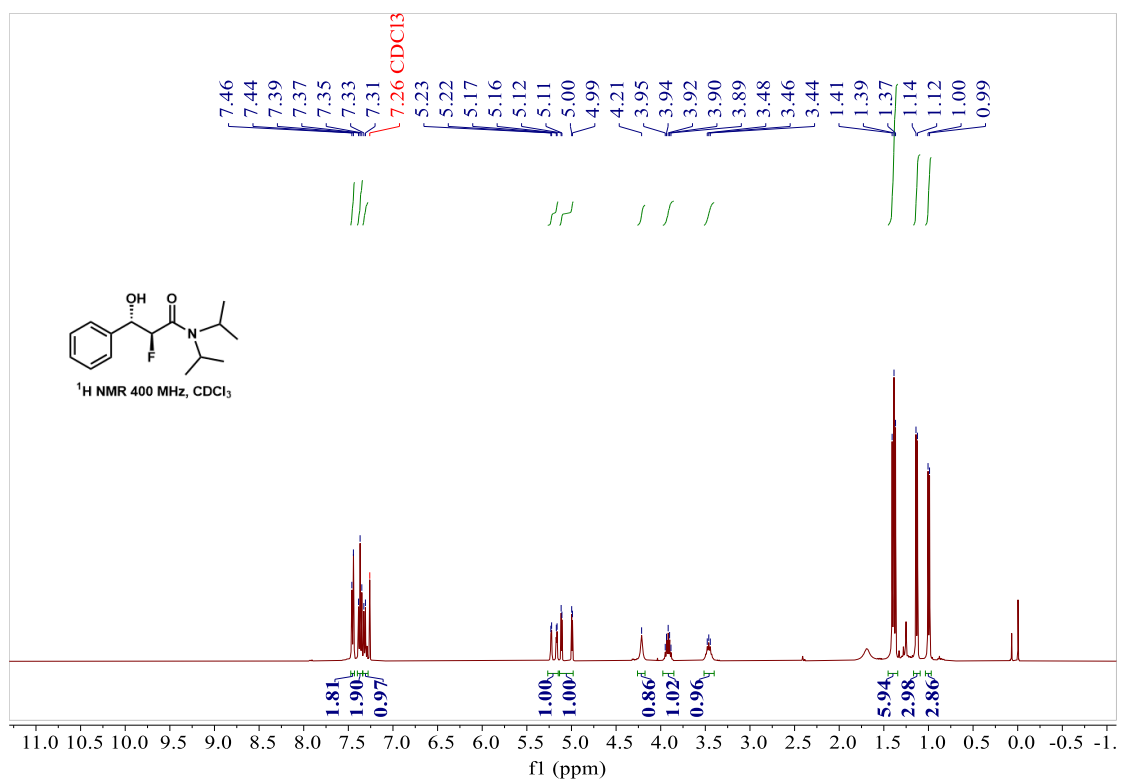

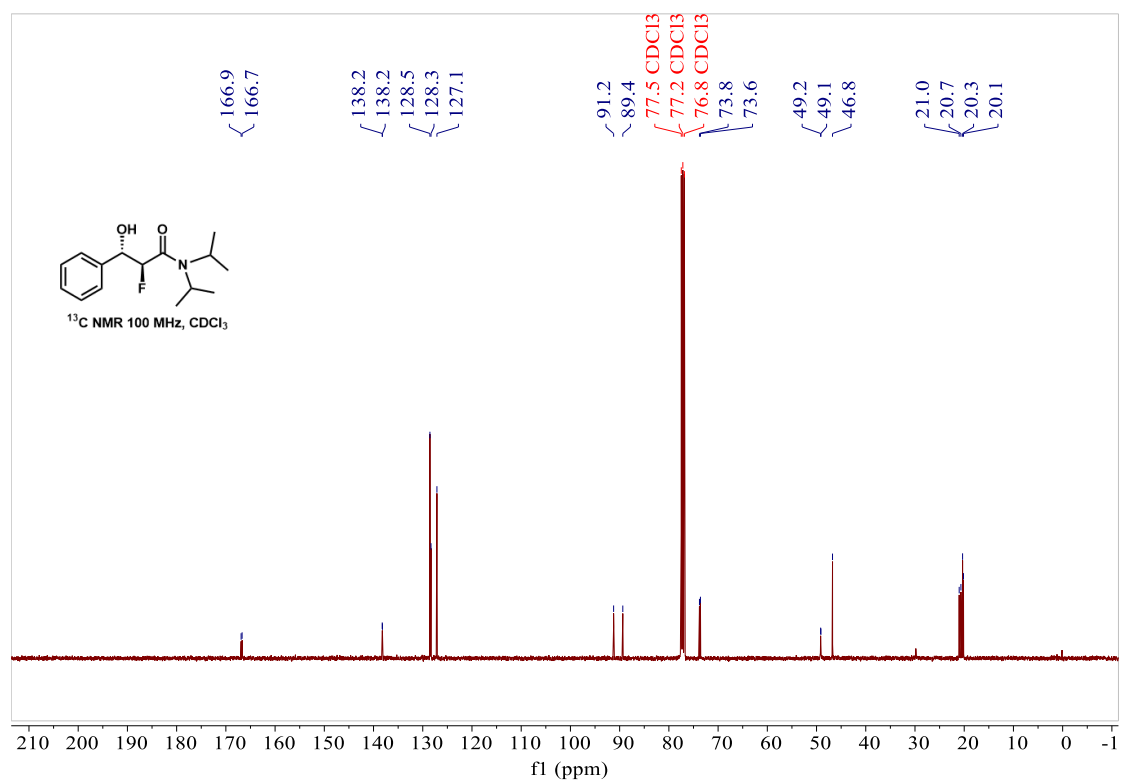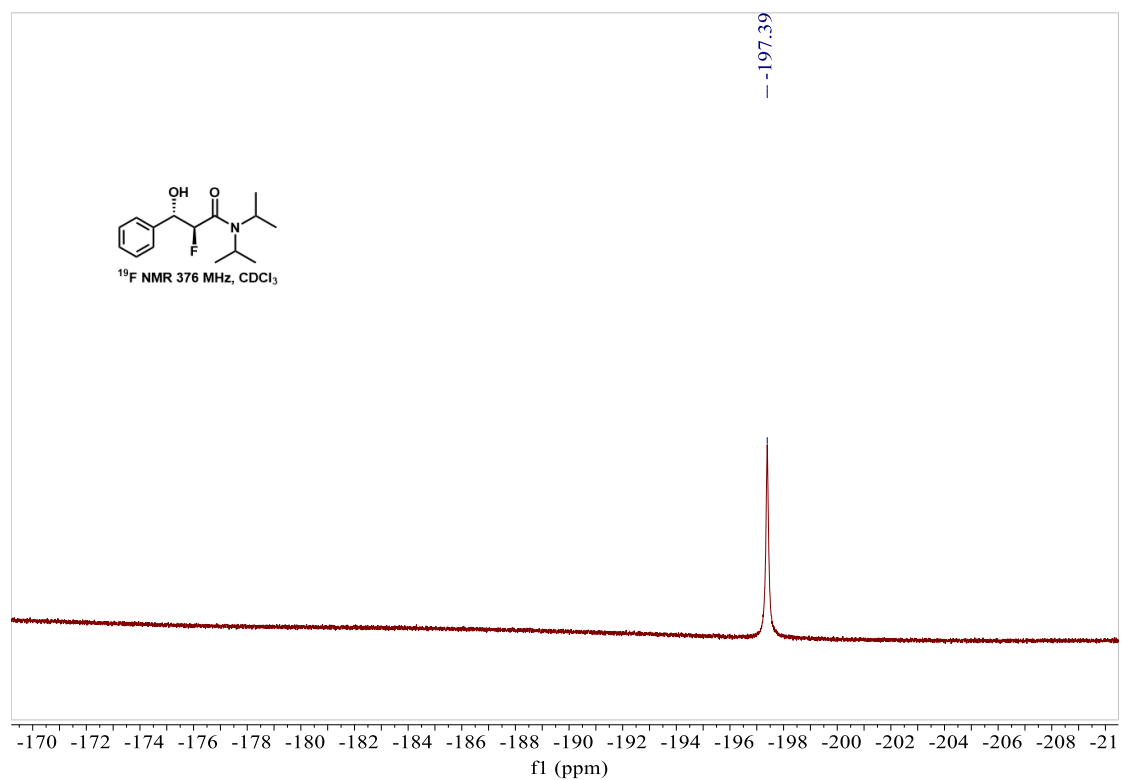

**(2*S*,3*S*)-2-fluoro-3-hydroxy-3-phenyl-1-(pyrrolidin-1-yl)propan-1-one (2q):**

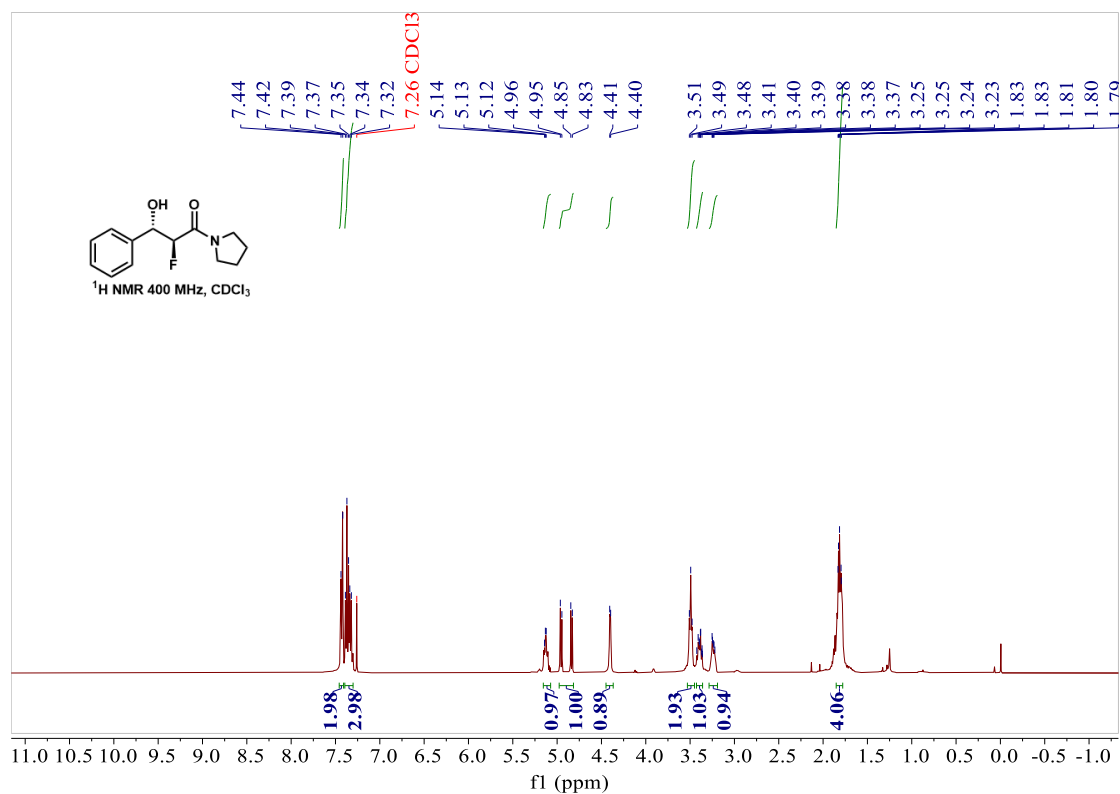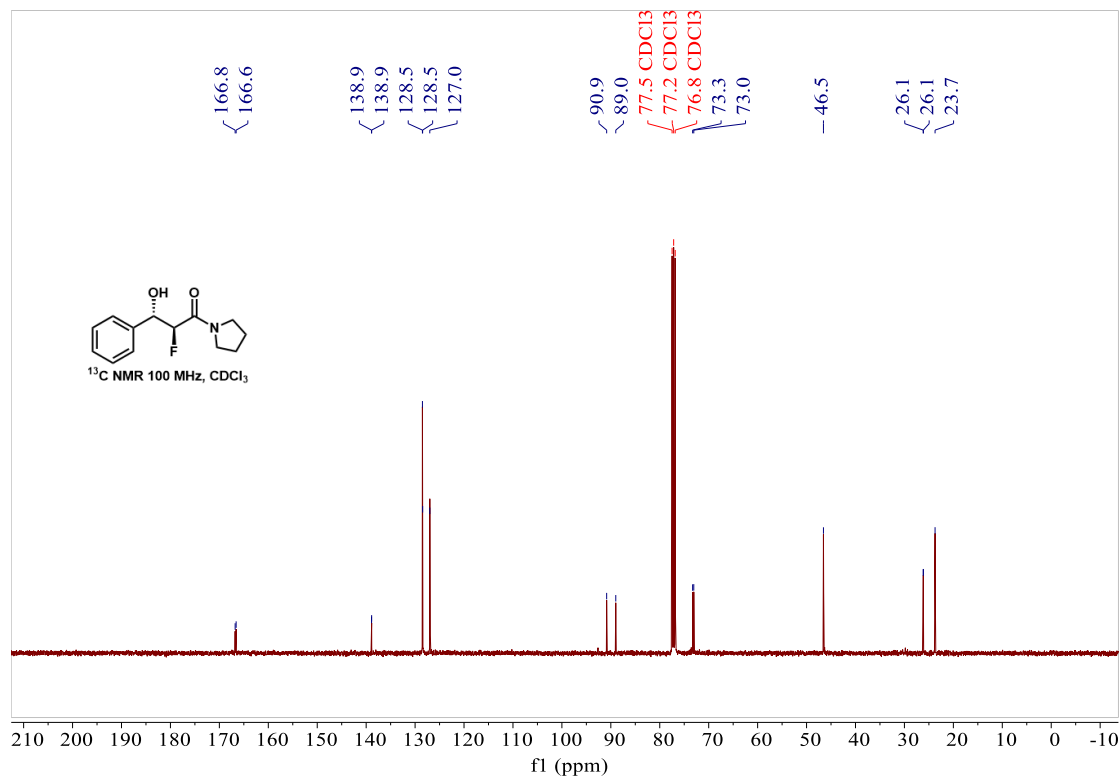

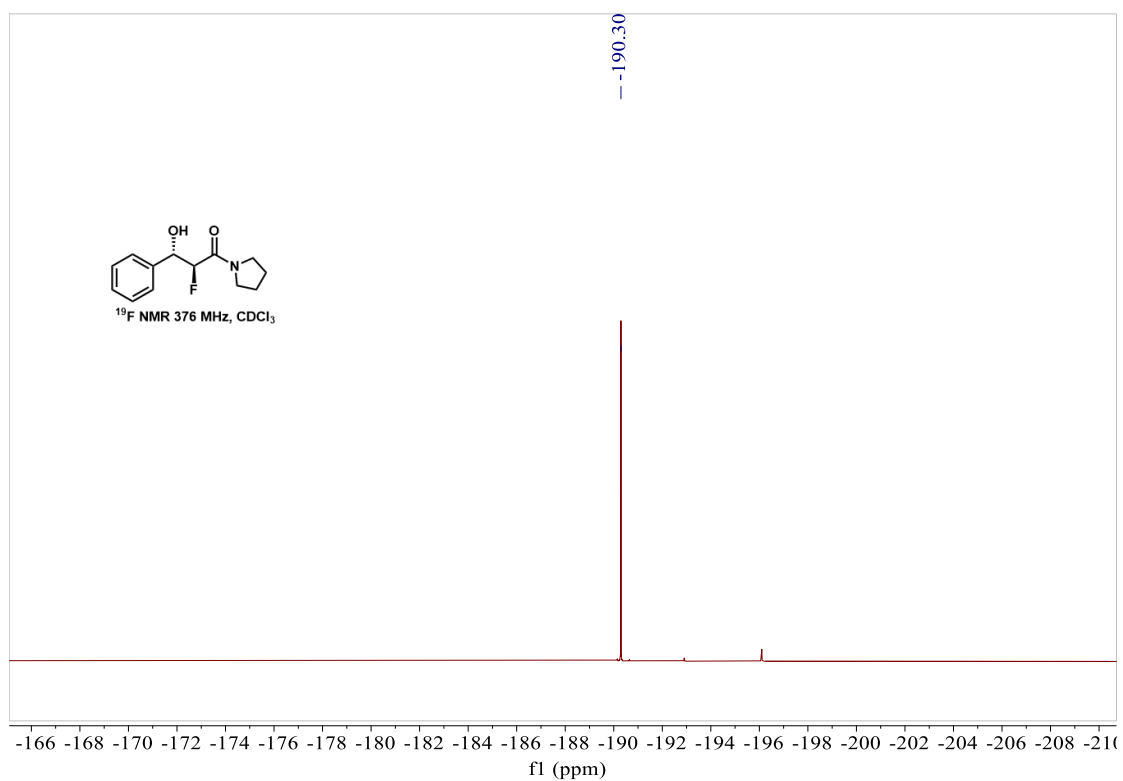

**(2S,3S)-2-fluoro-3-hydroxy-N-methyl-3-phenylpropanamide (2r):**

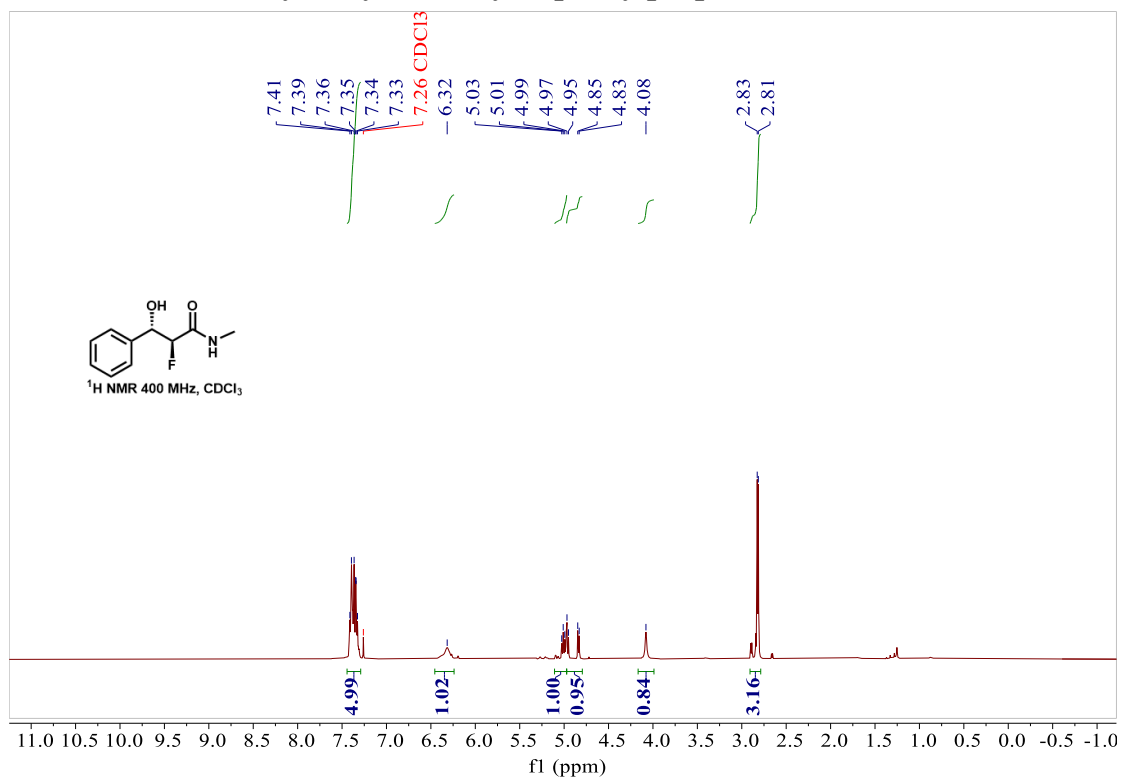

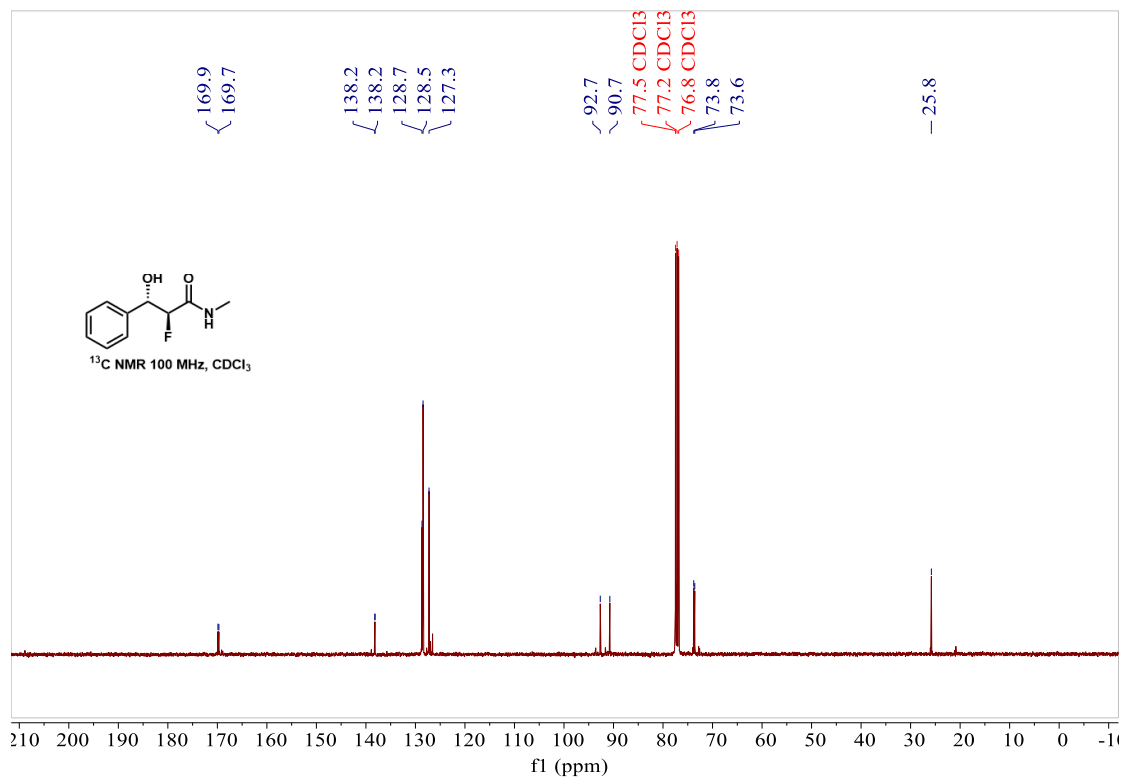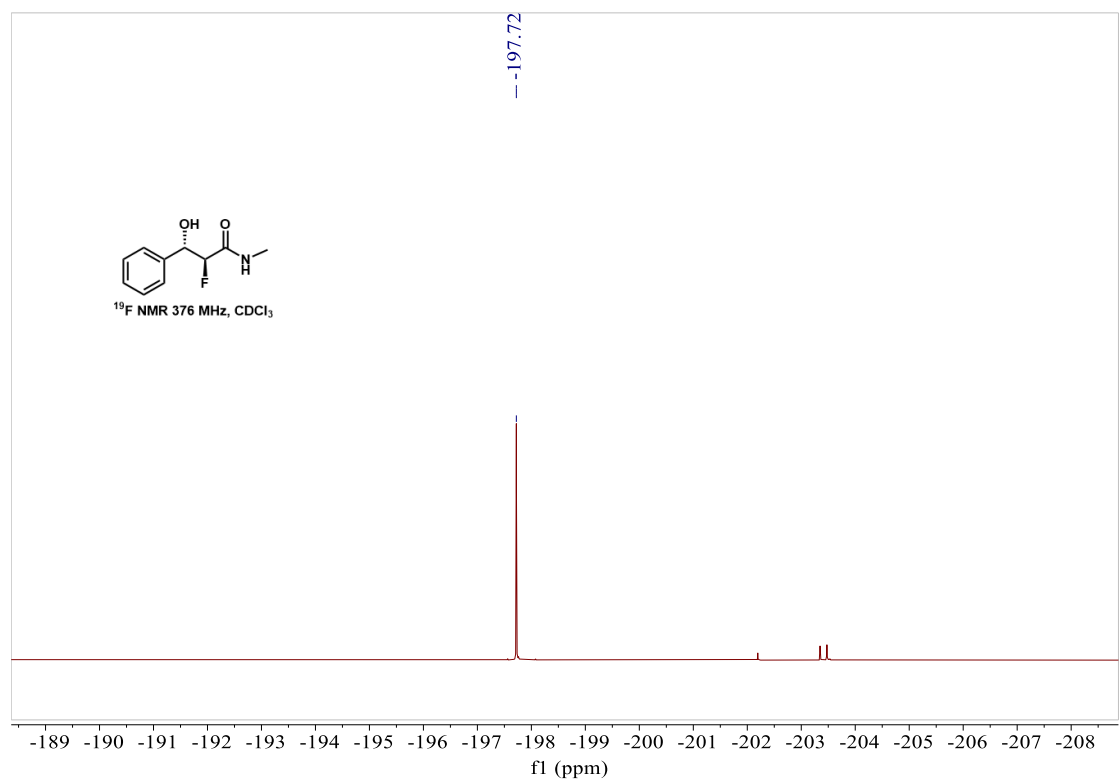

**(2*S*,3*S*)-2-fluoro-3-hydroxy-3-phenyl-N-propylpropanamide (2s):**

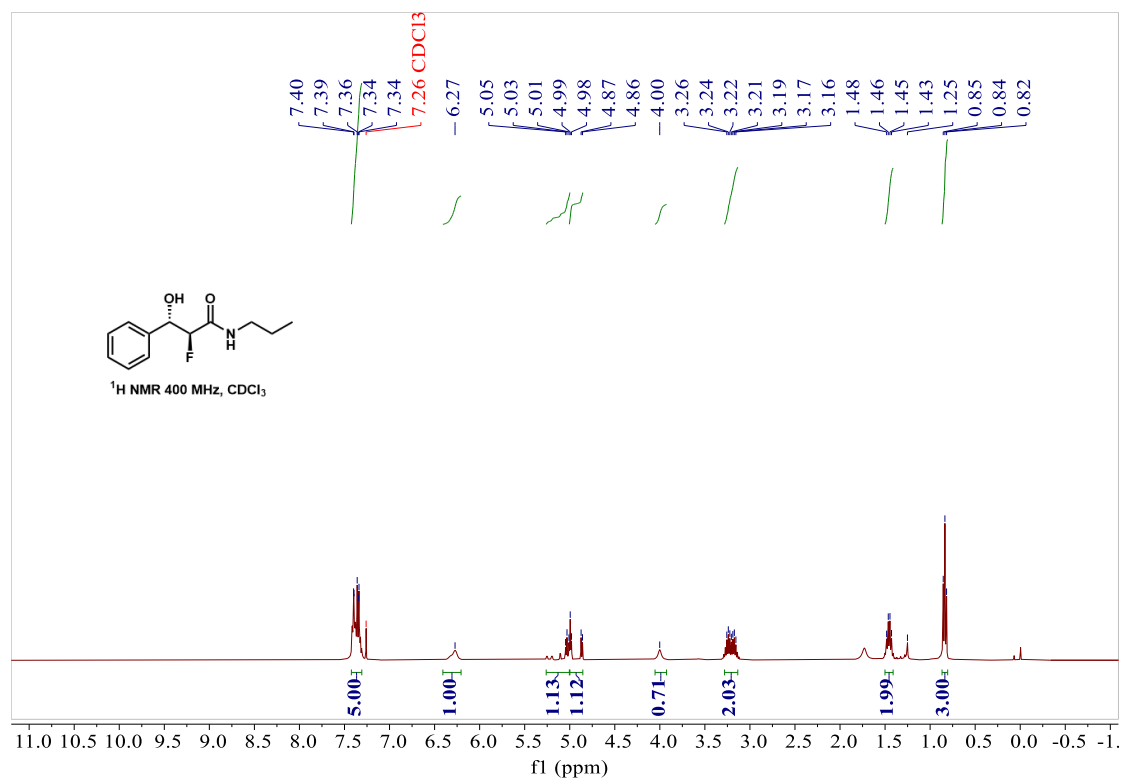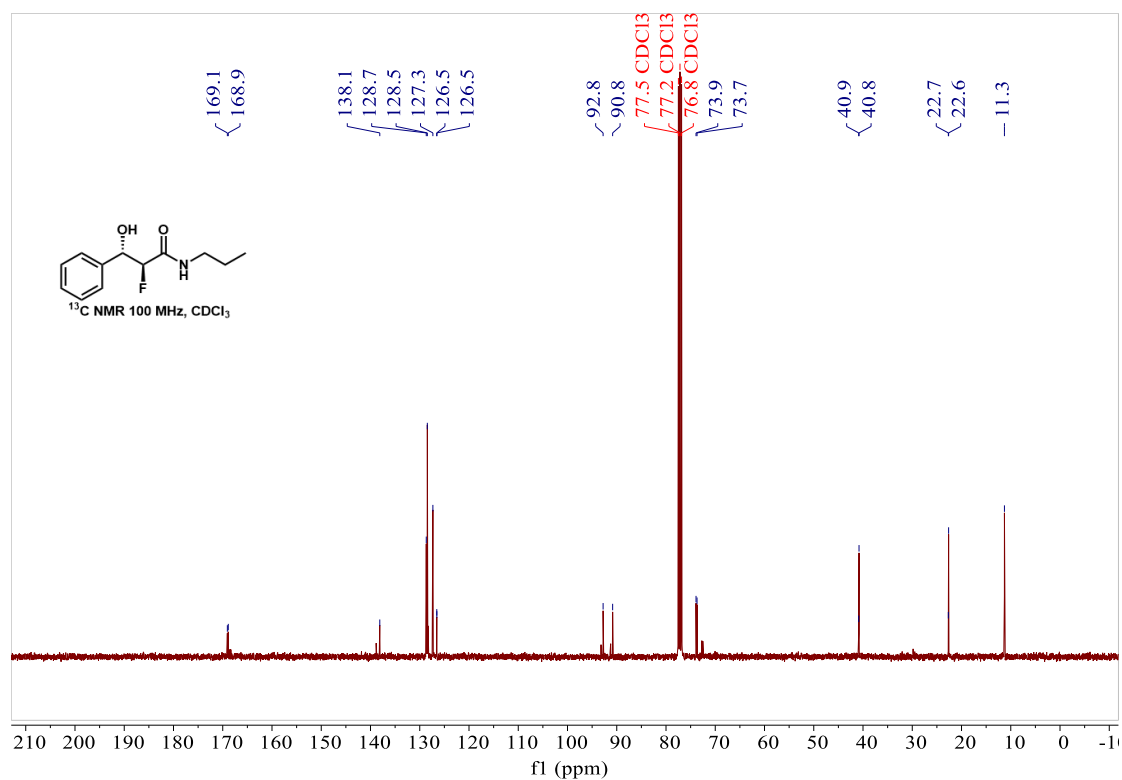

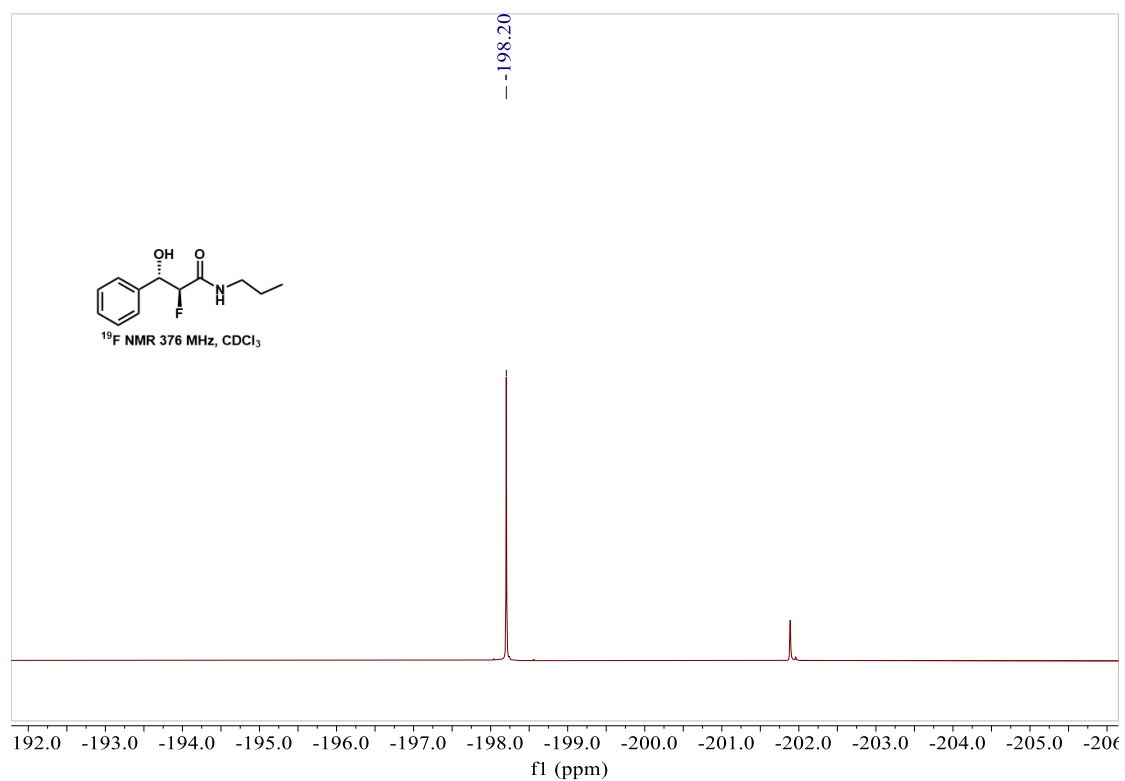

**(2S,3S)-2-fluoro-3-hydroxy-N-isopropyl-3-phenylpropanamide (2t):**

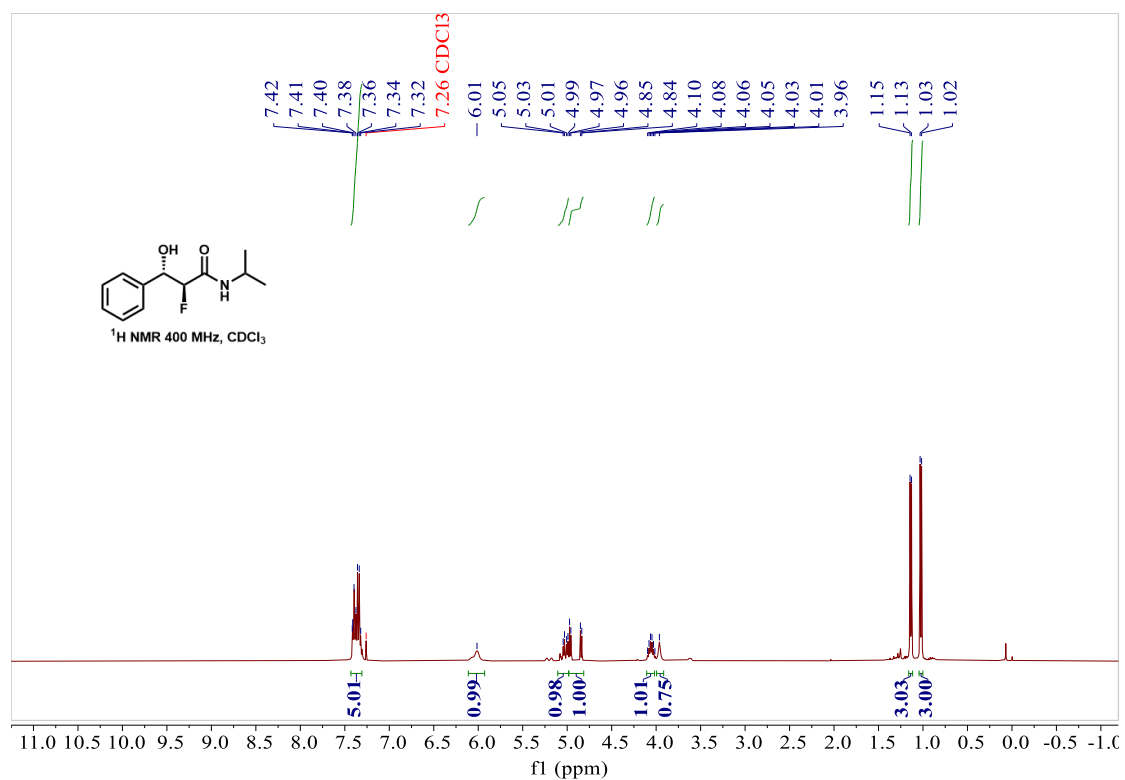

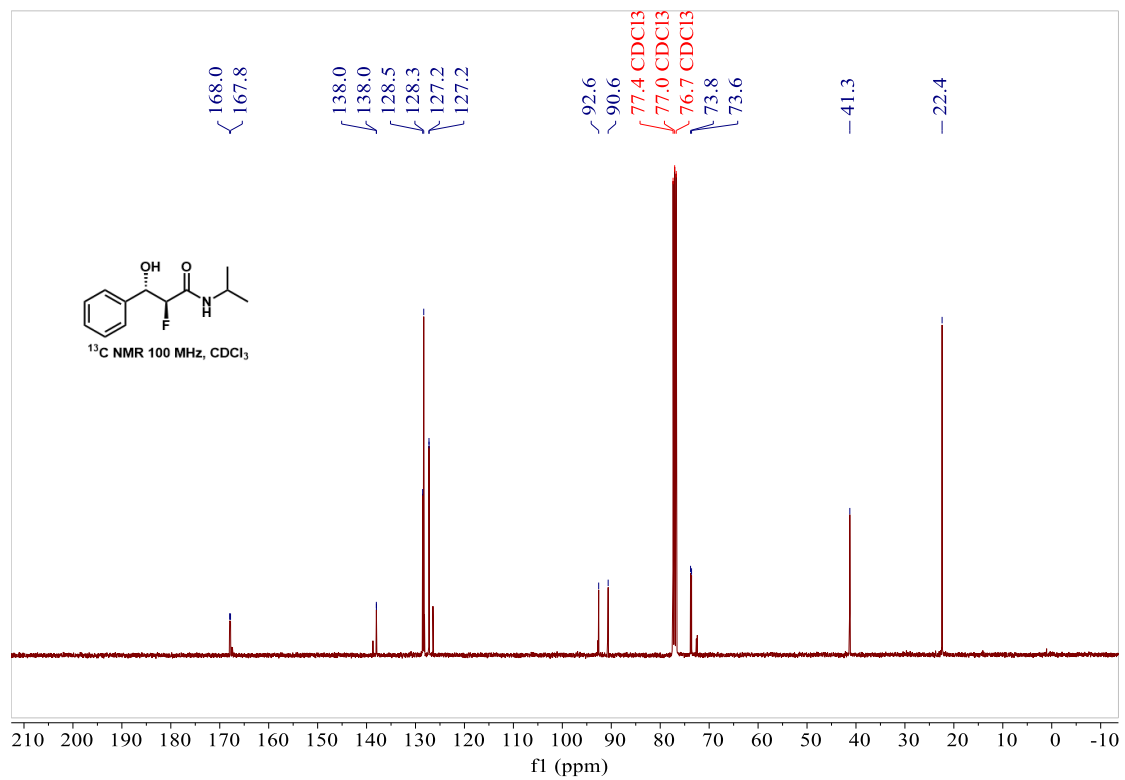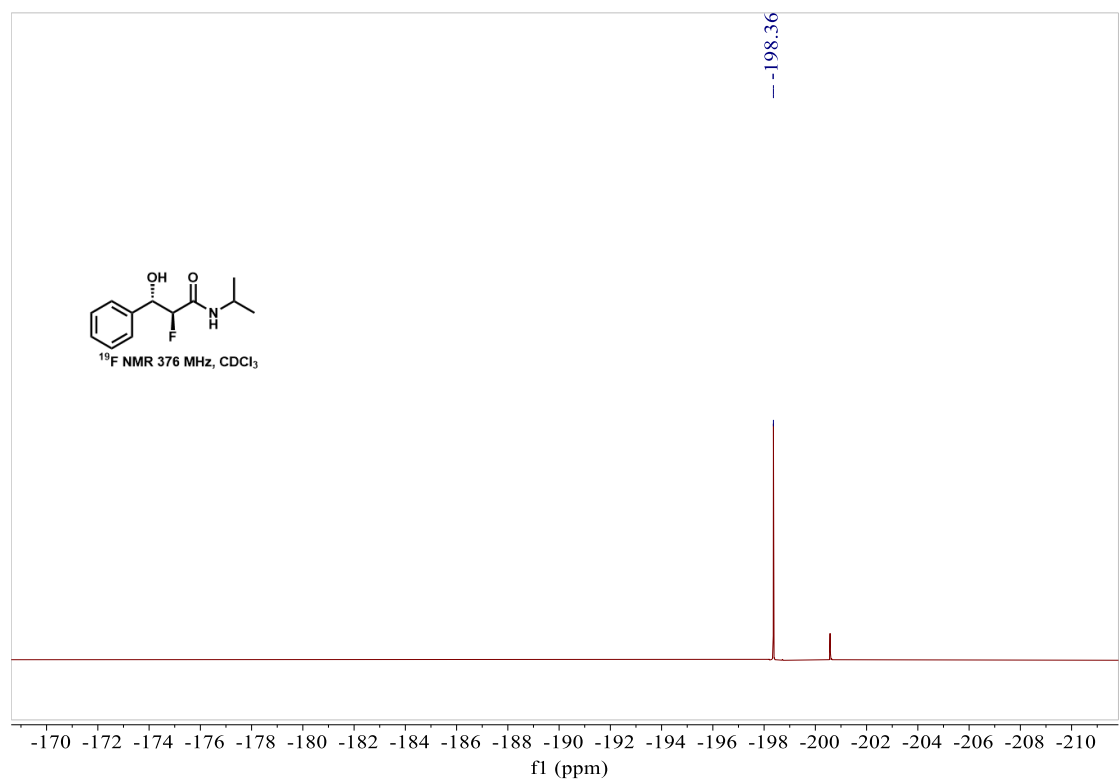



**(2*S*,3*S*)-N-(tert-butyl)-2-fluoro-3-hydroxy-3-phenylpropanamide (2u):**

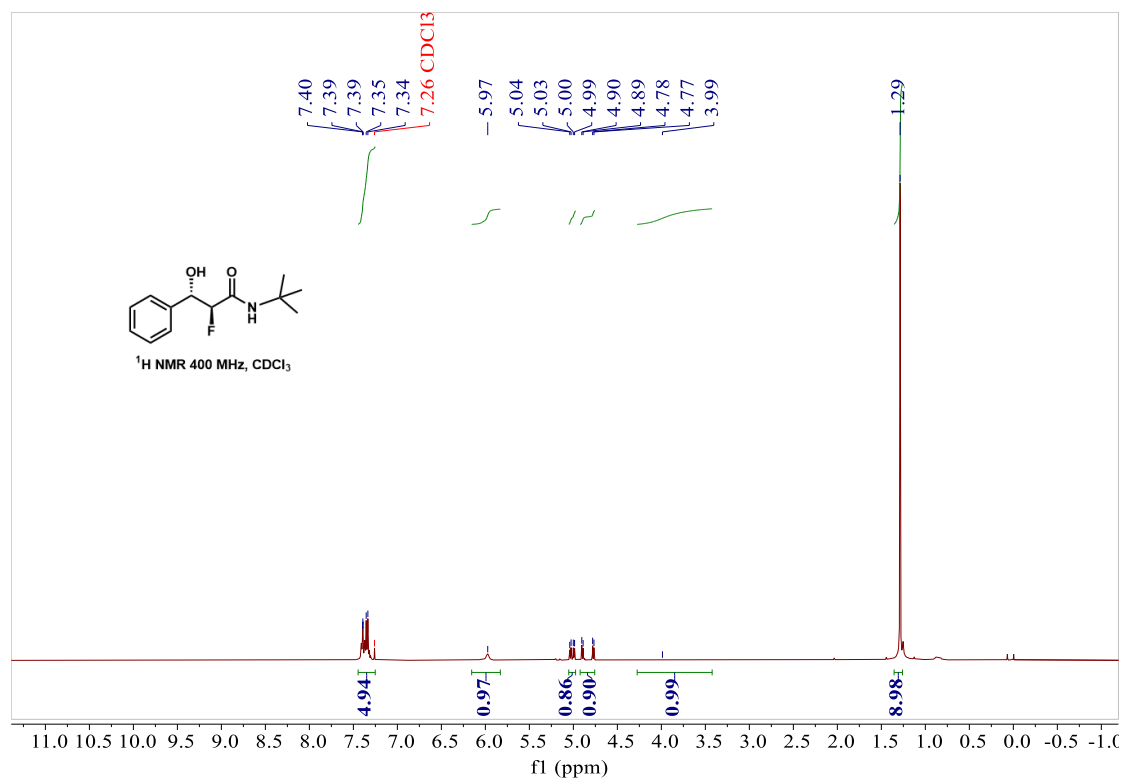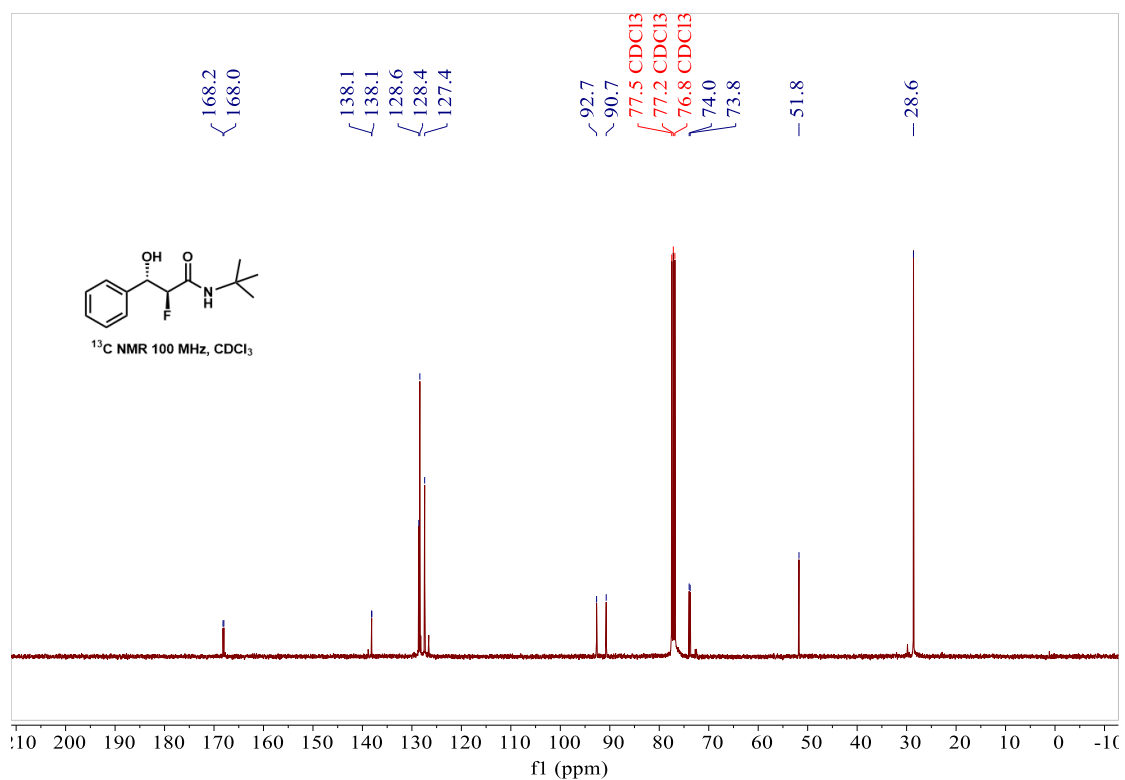

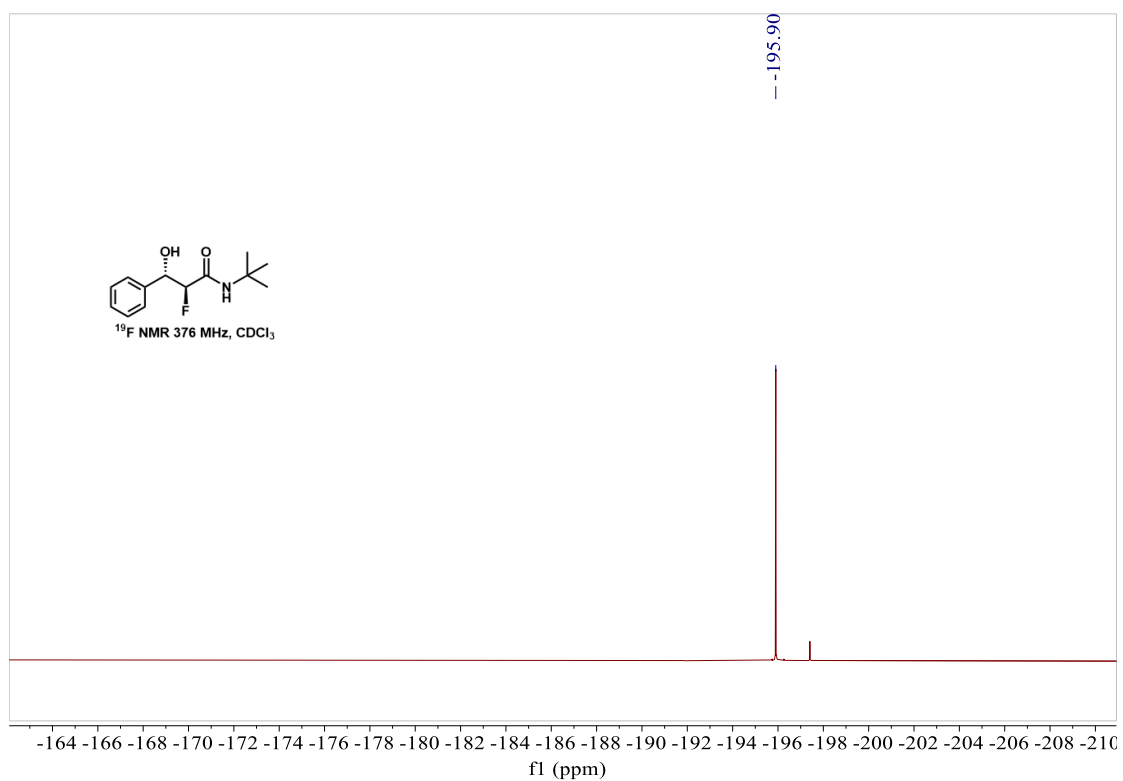

**(2S,3R)-2-fluoro-3-hydroxy-N,N-dimethyl-3-(thiophen-2-yl)propanamide (4a):**

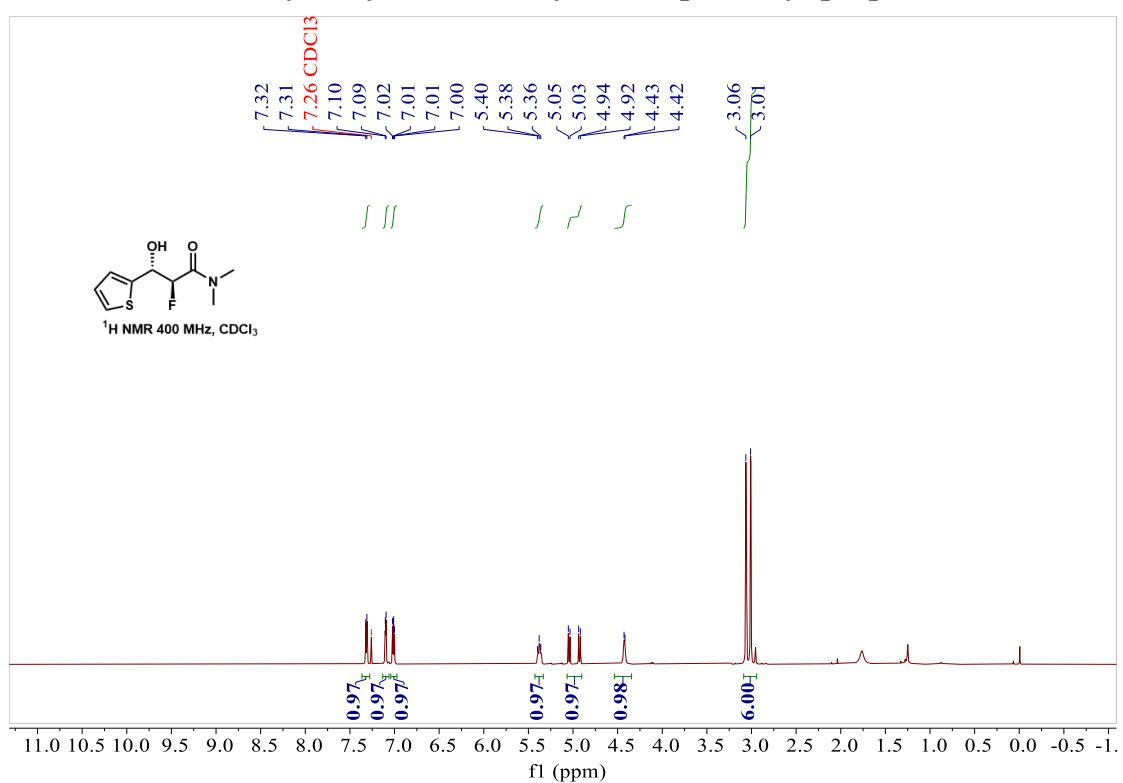

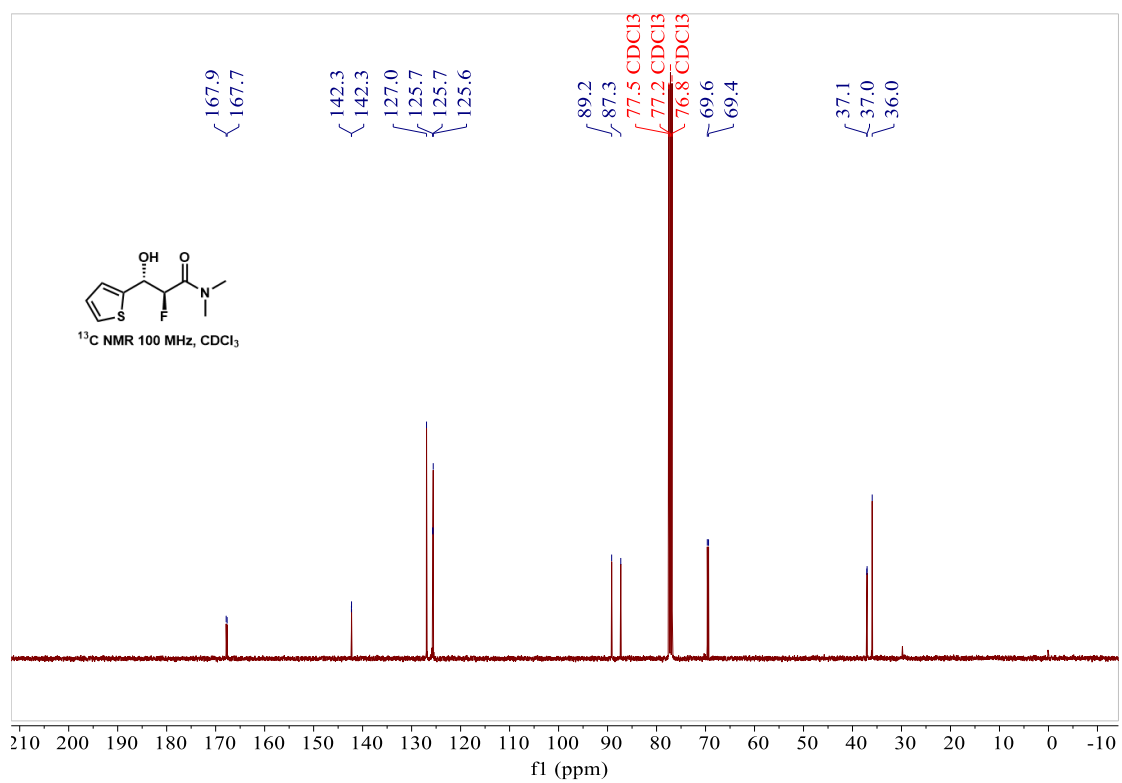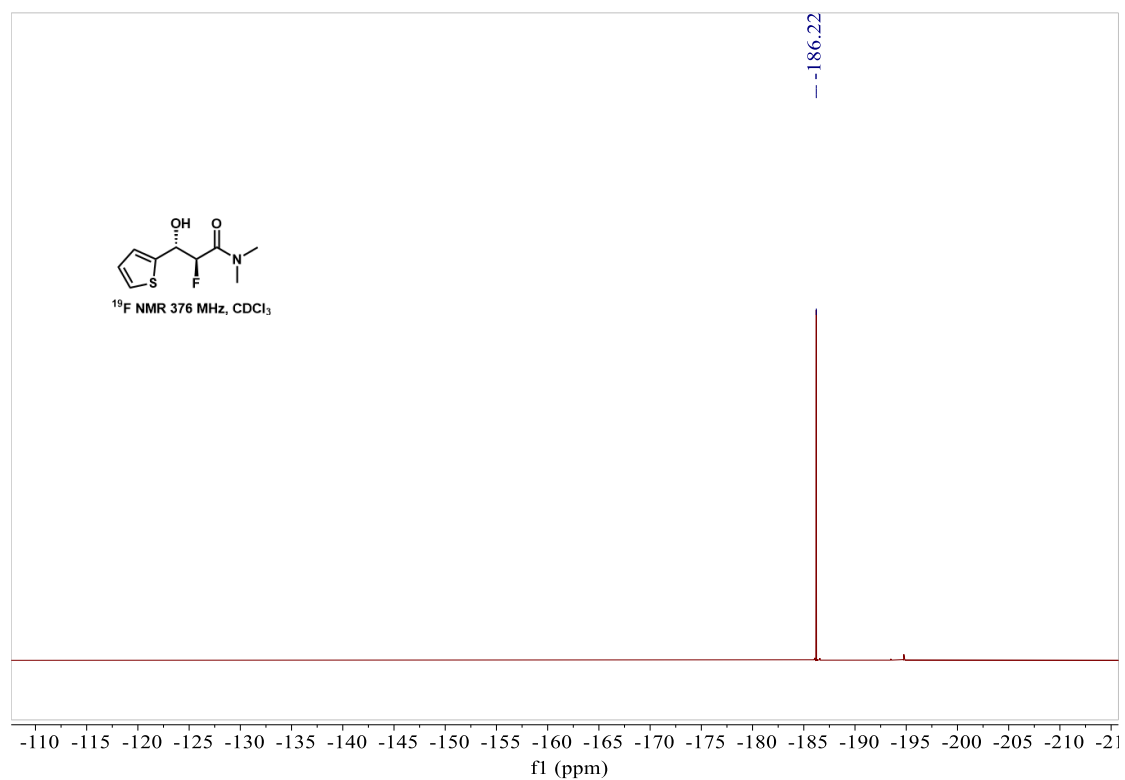

**(2*S*,3*S*)-2-fluoro-3-hydroxy-*N,N*-dimethyl-3-(naphthalen-2-yl)propenamide (4b):**

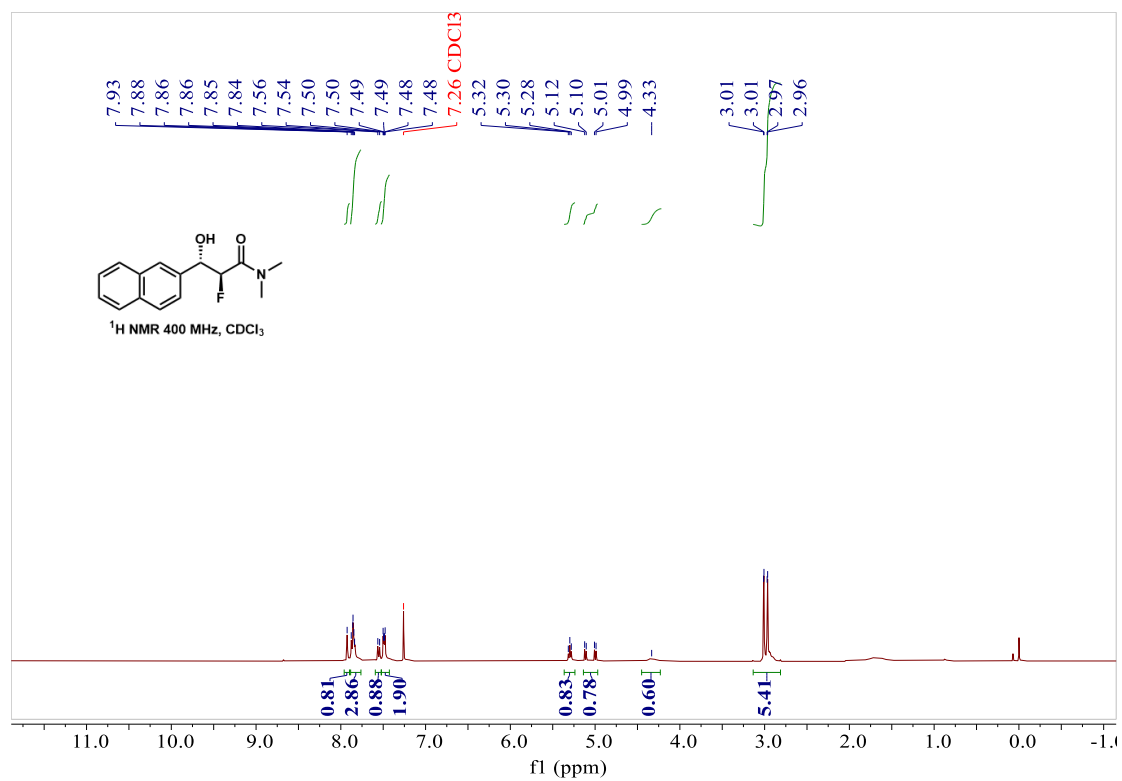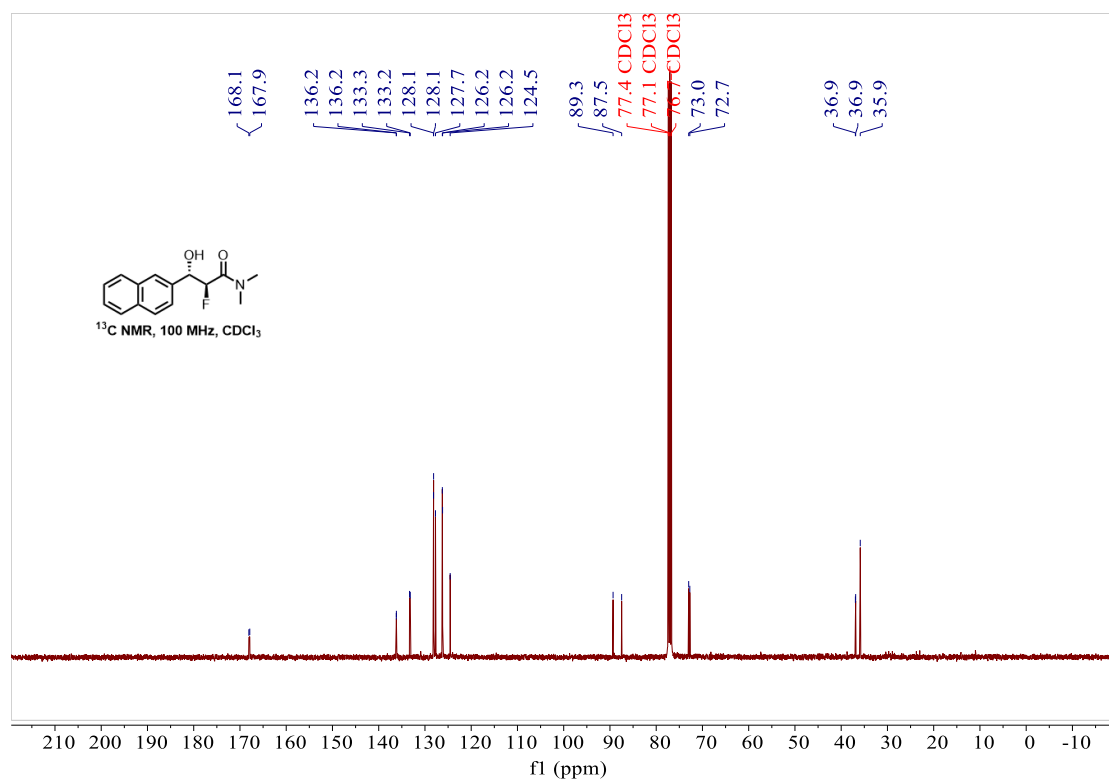

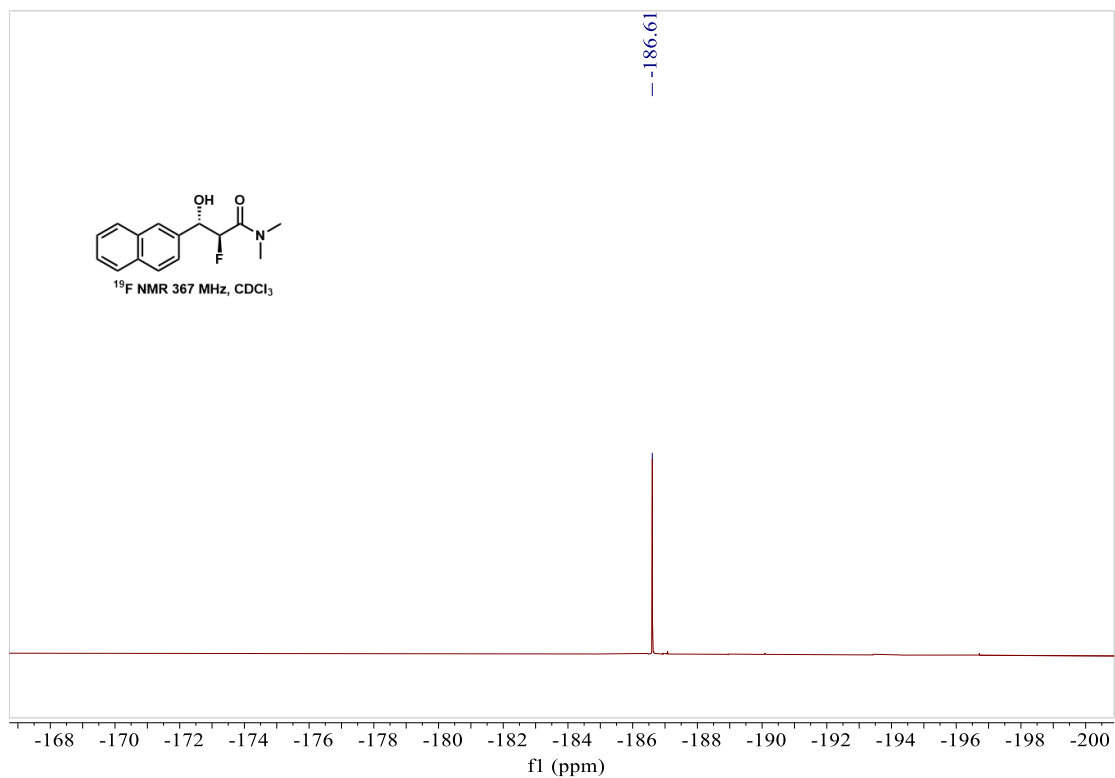

**(2*S*,3*S*)-3-([1,1'-biphenyl]-4-yl)-2-fluoro-3-hydroxy-*N,N*-dimethylpropanamide**

**(4c):**

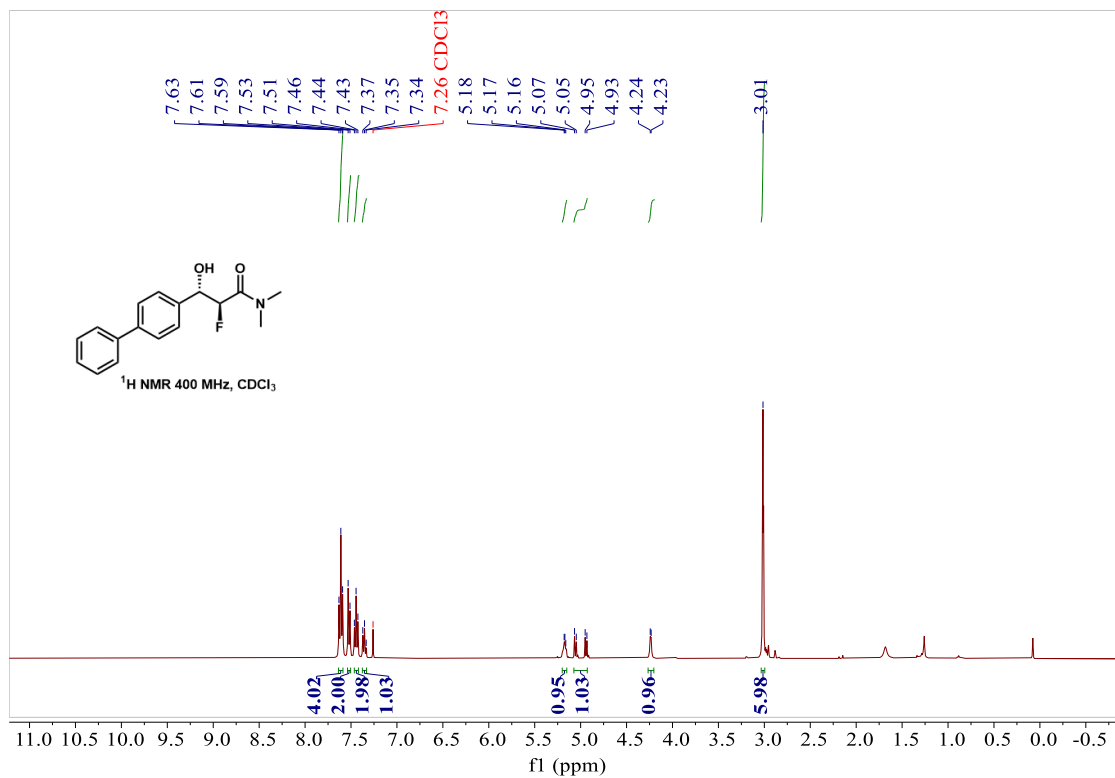

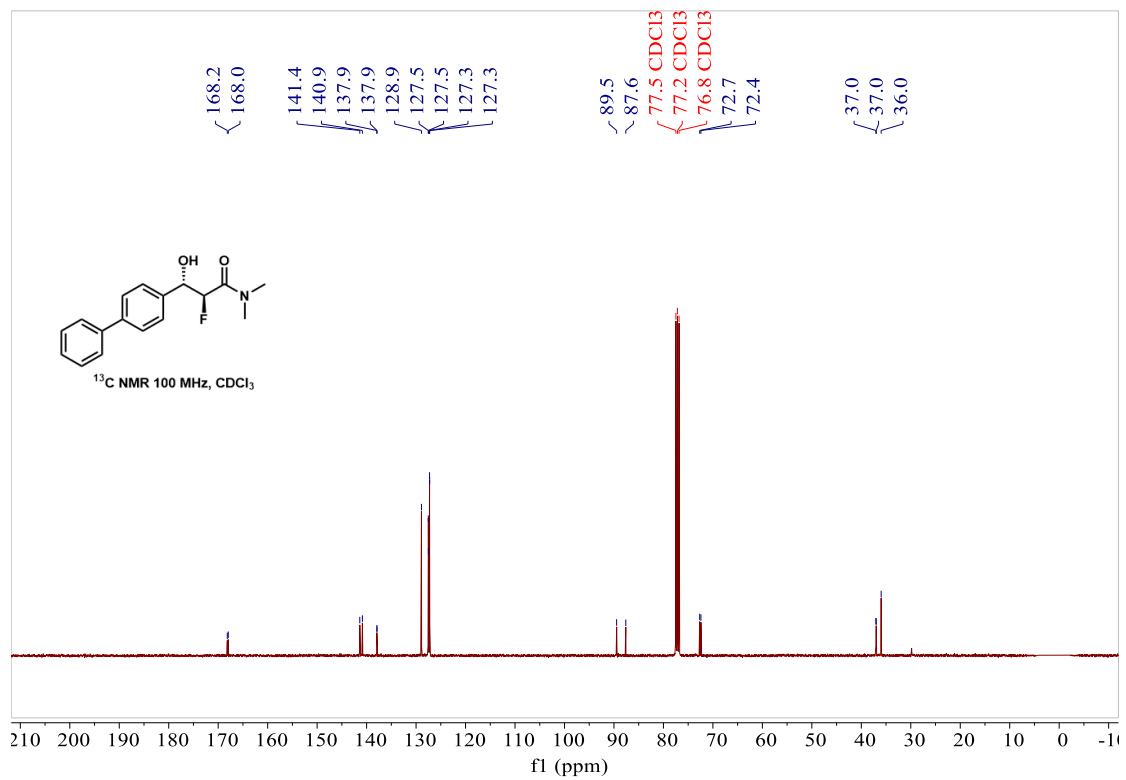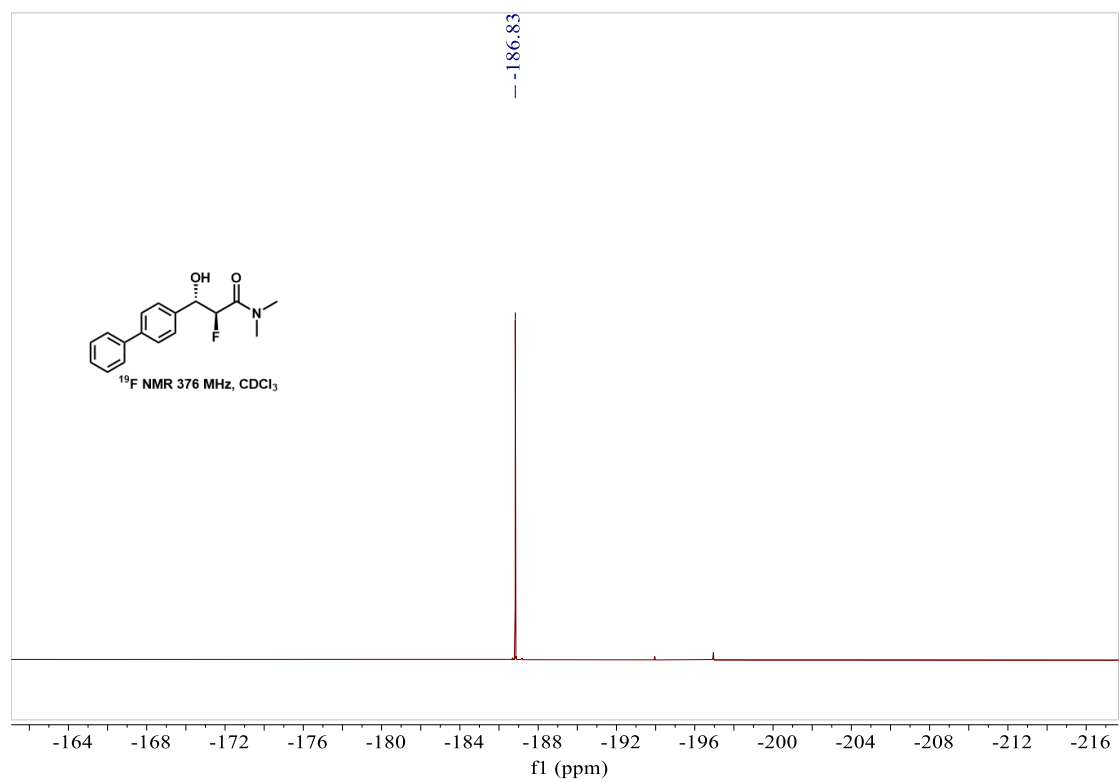

**(2*S*,3*S*)-3-(benzo[*d*][1,3]dioxol-5-yl)-2-fluoro-3-hydroxy-*N,N*-dimethylpropanami-  
-de (4d):**

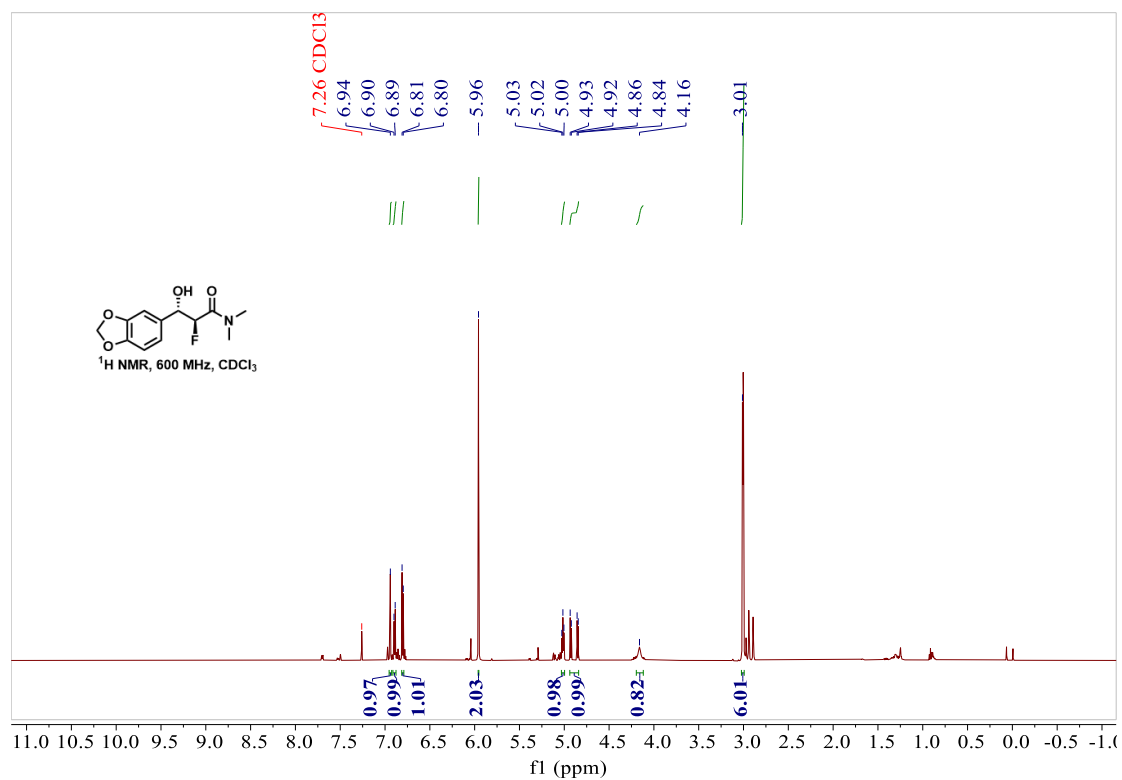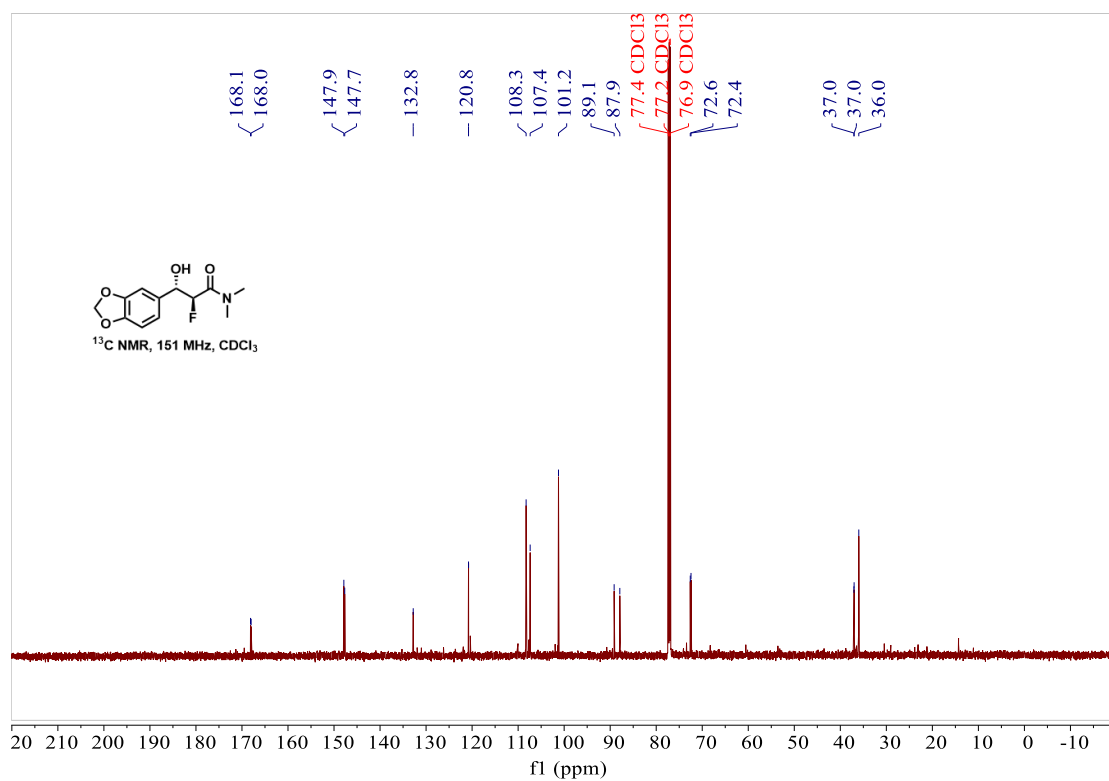

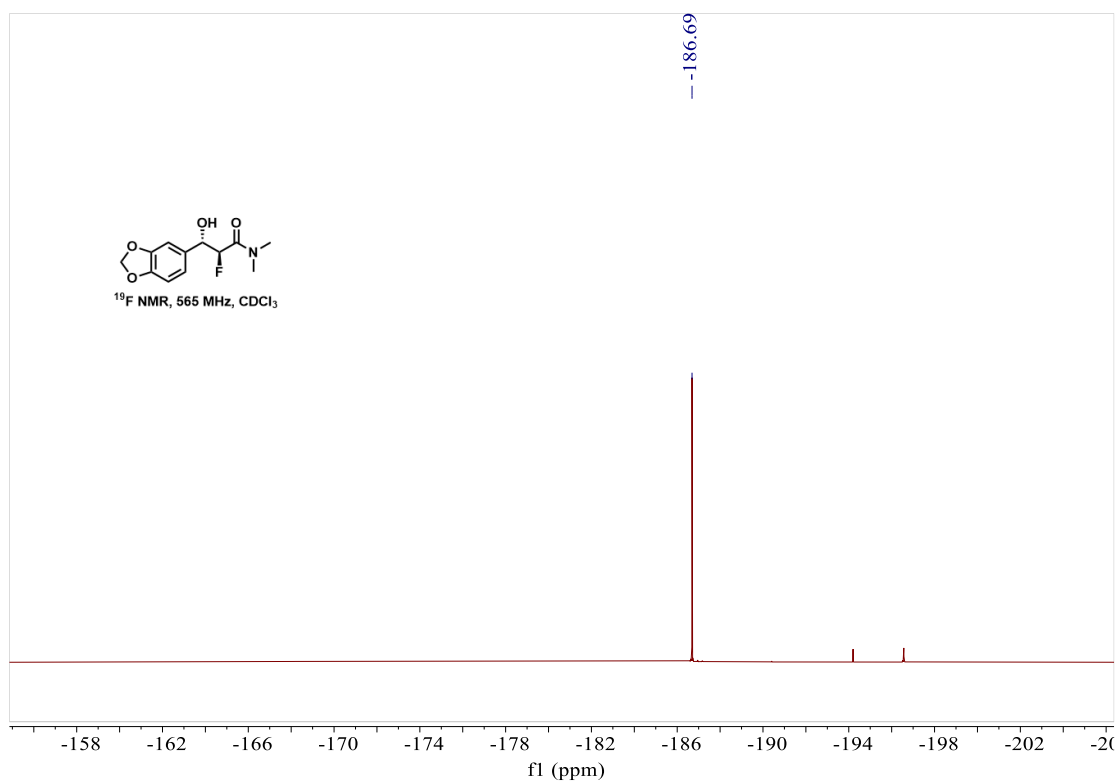

**Methyl (2S,3S)-2-fluoro-3-hydroxy-3-phenylpropanoate (4e):**

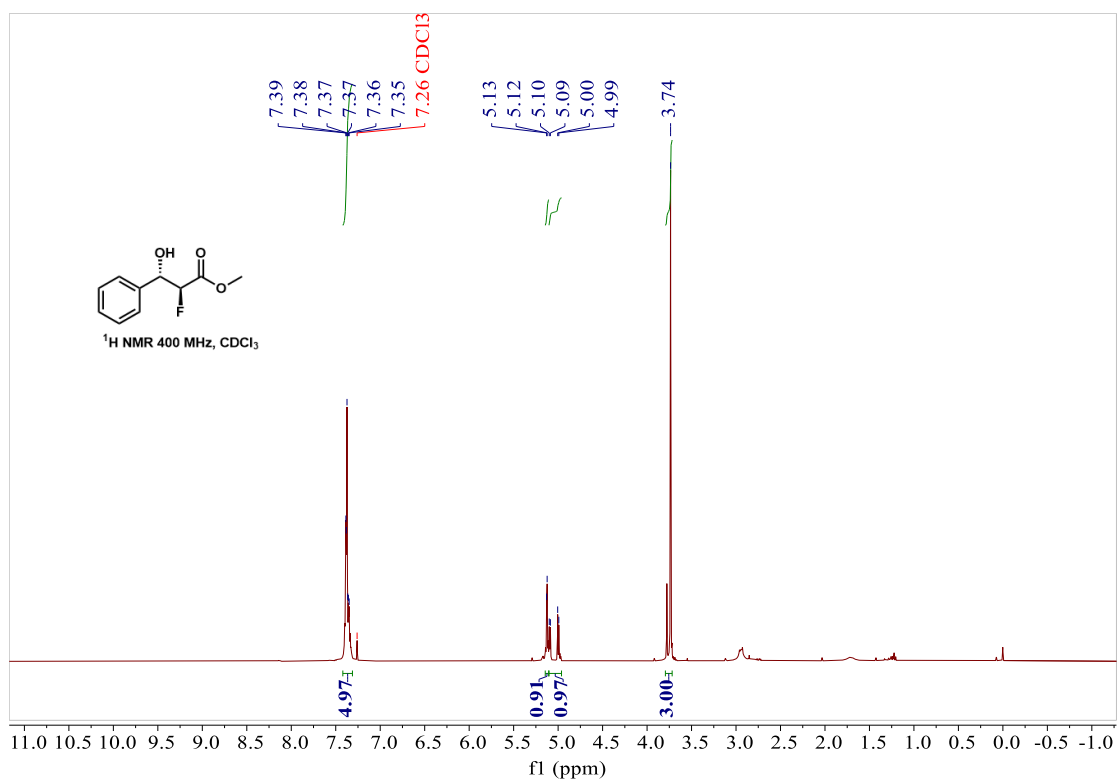



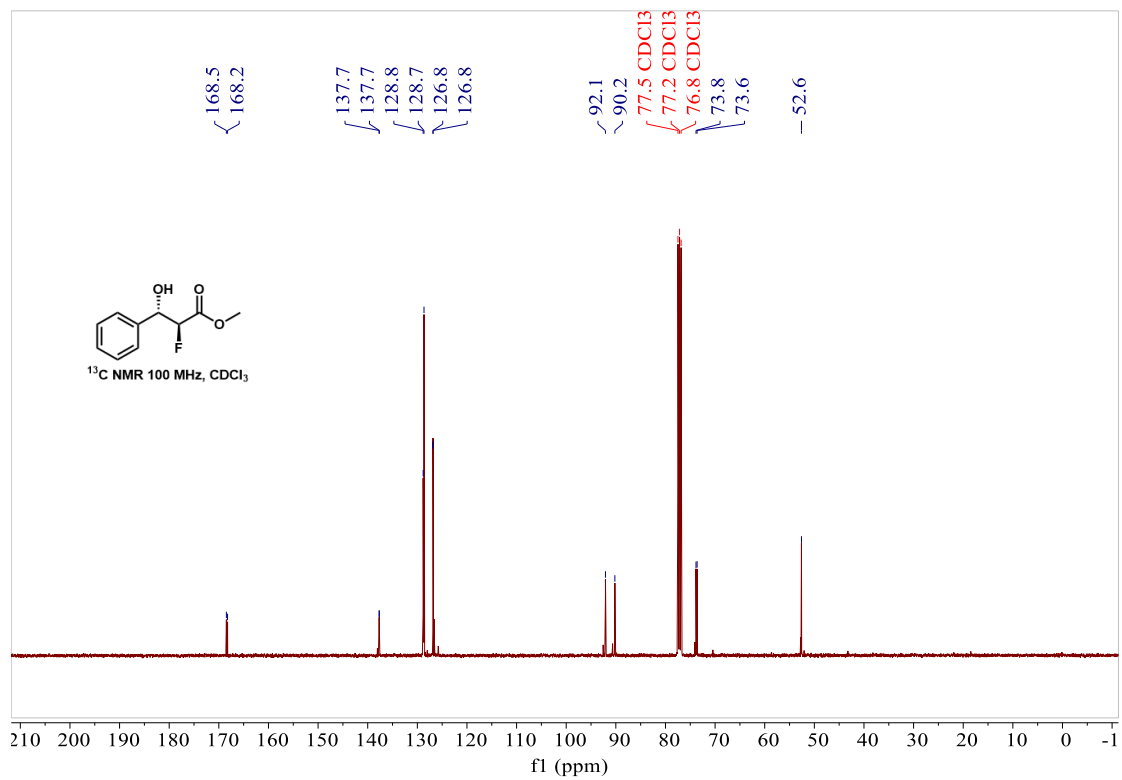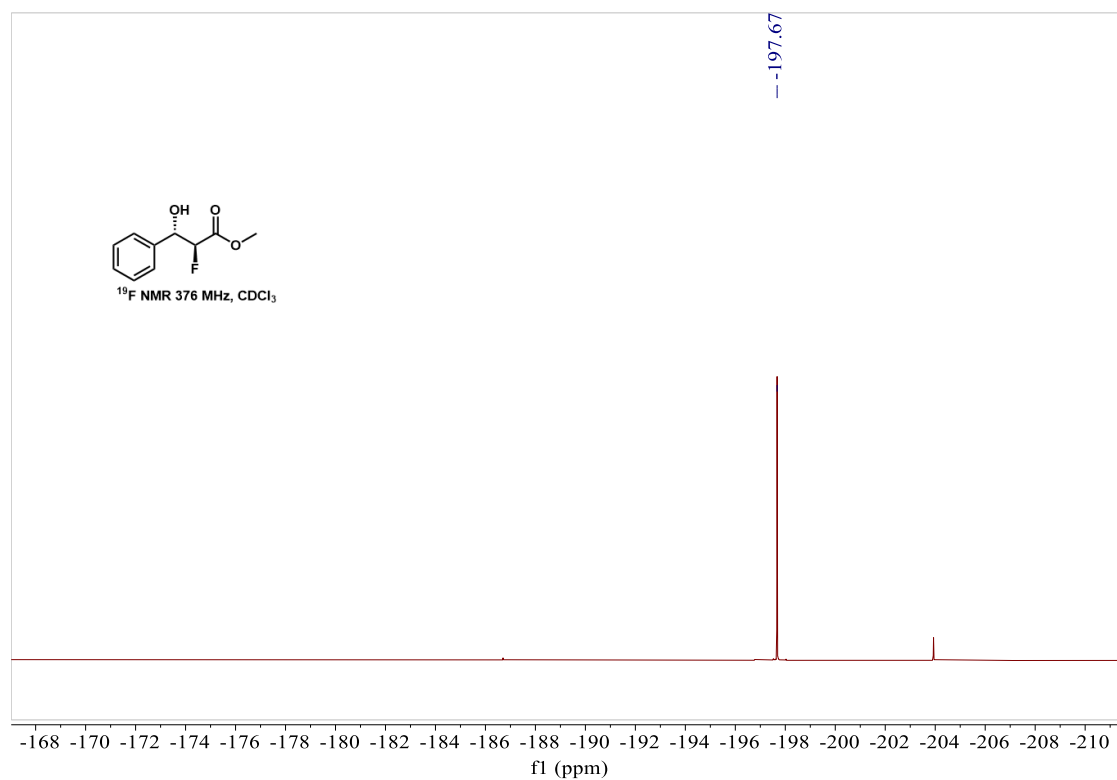

### Ethyl (2S,3S)-2-fluoro-3-hydroxy-3-phenylpropanoate (4f):

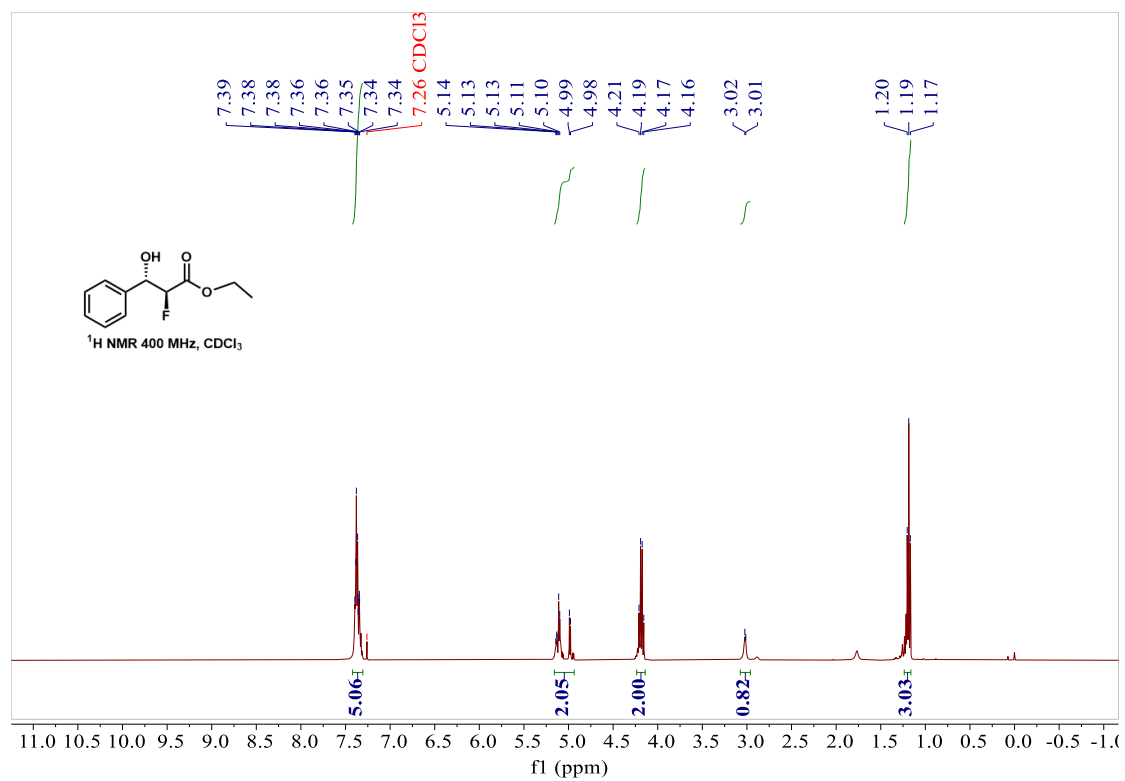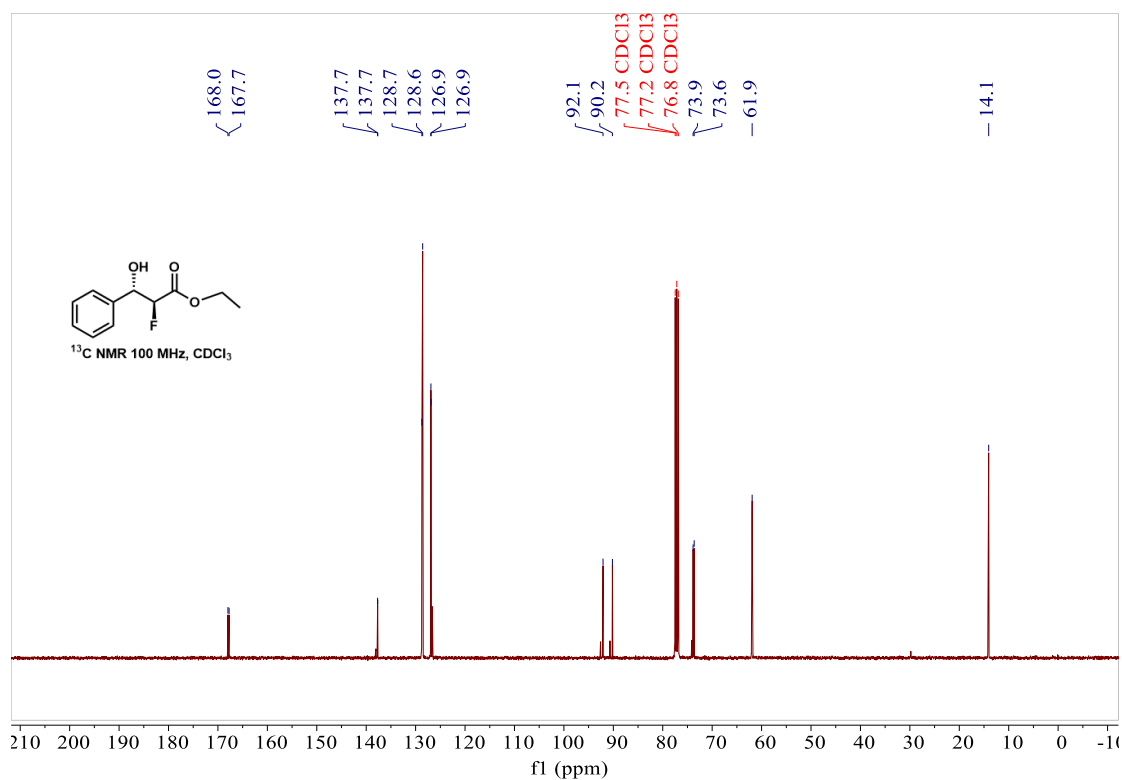

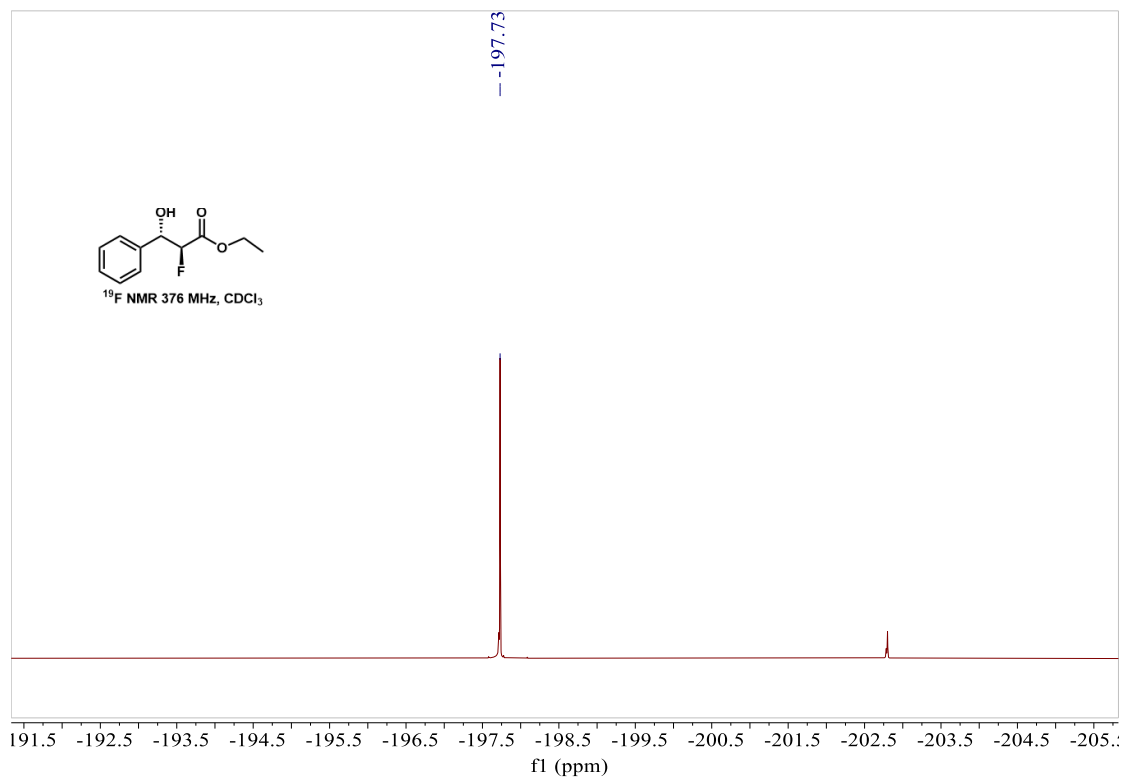

**(3R,5R,7R)-adamantan-1-yl(2S,3S)-2-fluoro-3-hydroxy-3-phenylpropanoate (4g):**

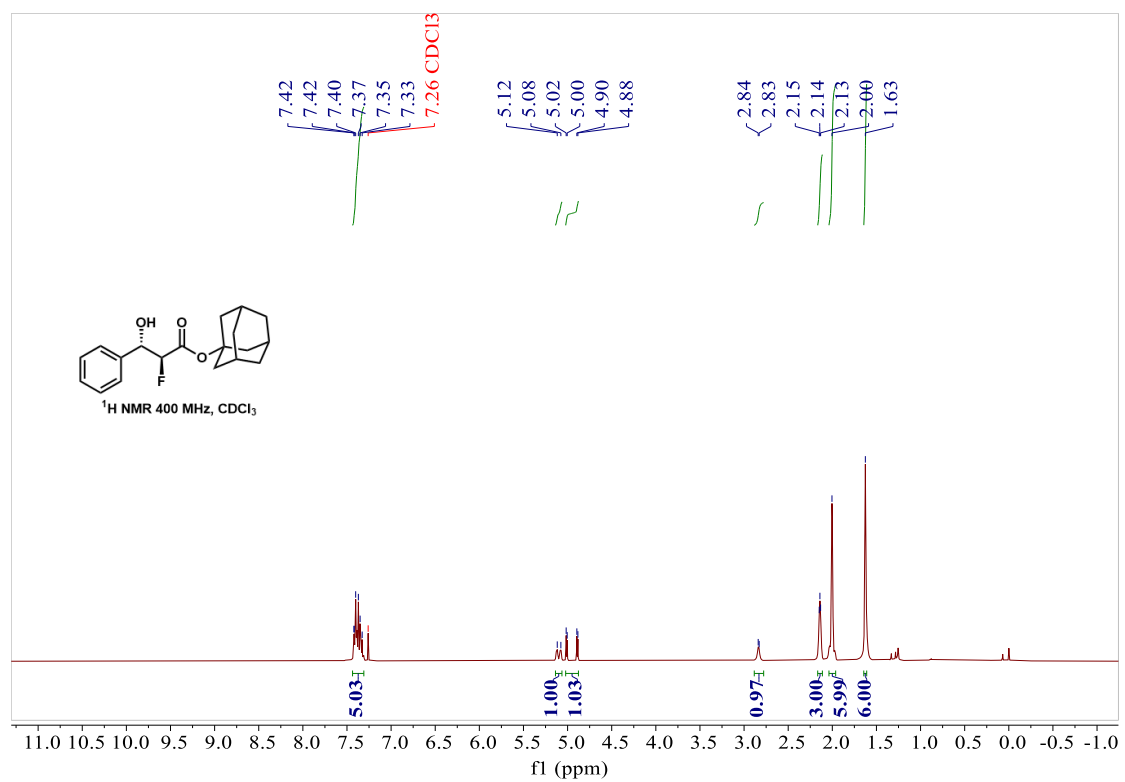

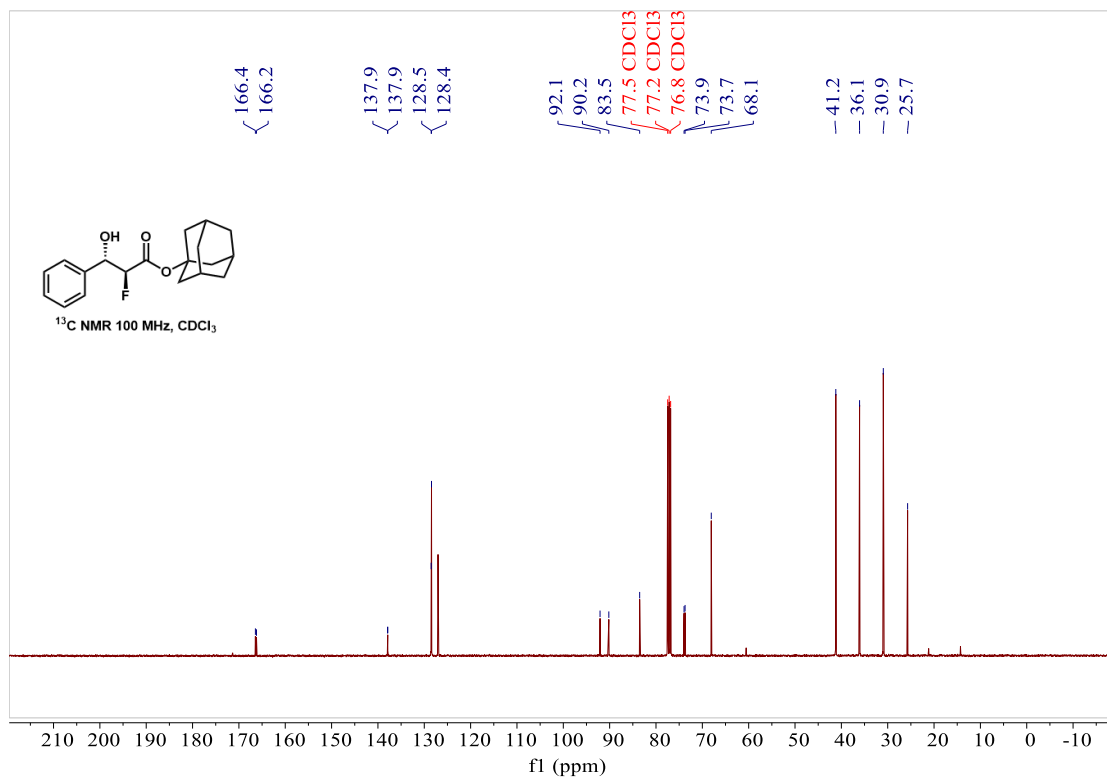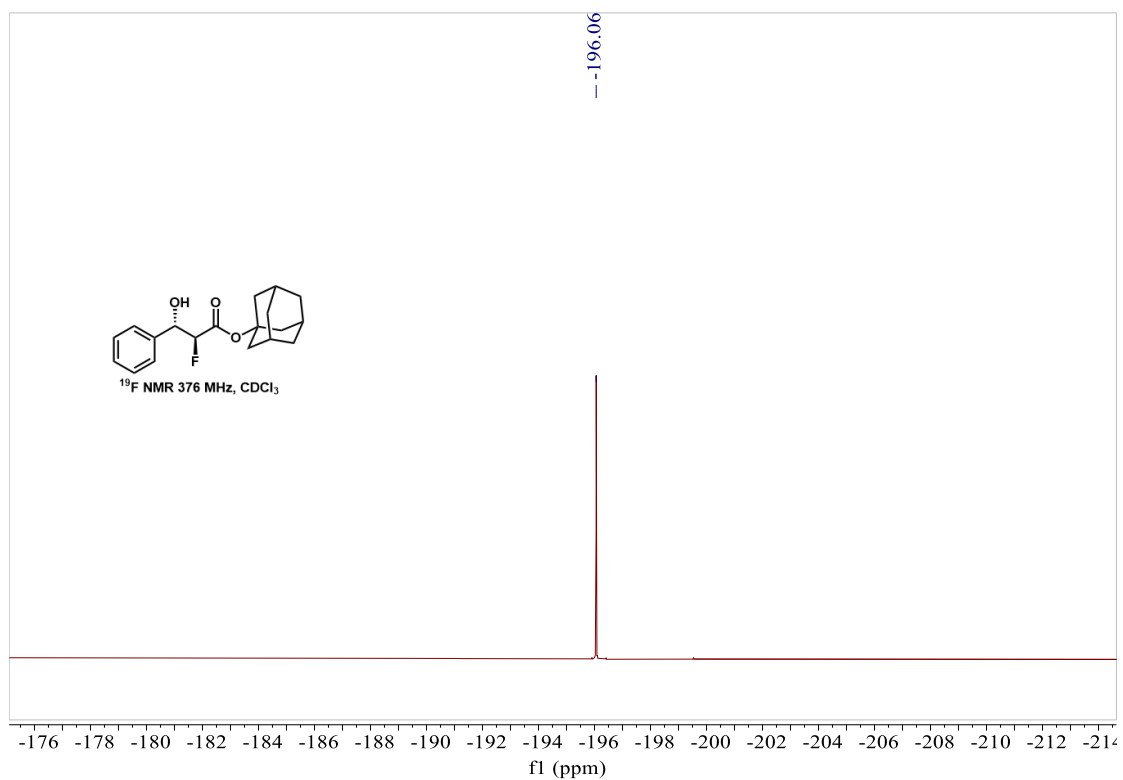

**(1*S*,2*S*)-2-fluoro-1-phenyl-2-(phenylsulfonyl)ethan-1-ol (4h):**

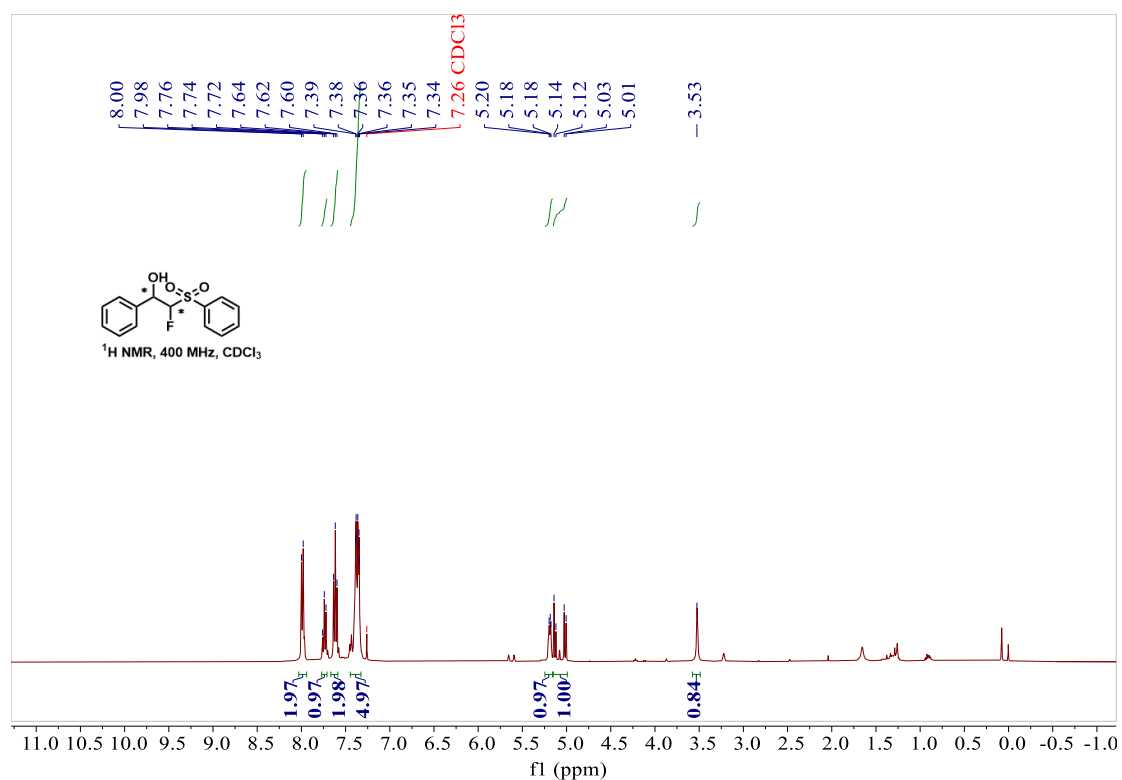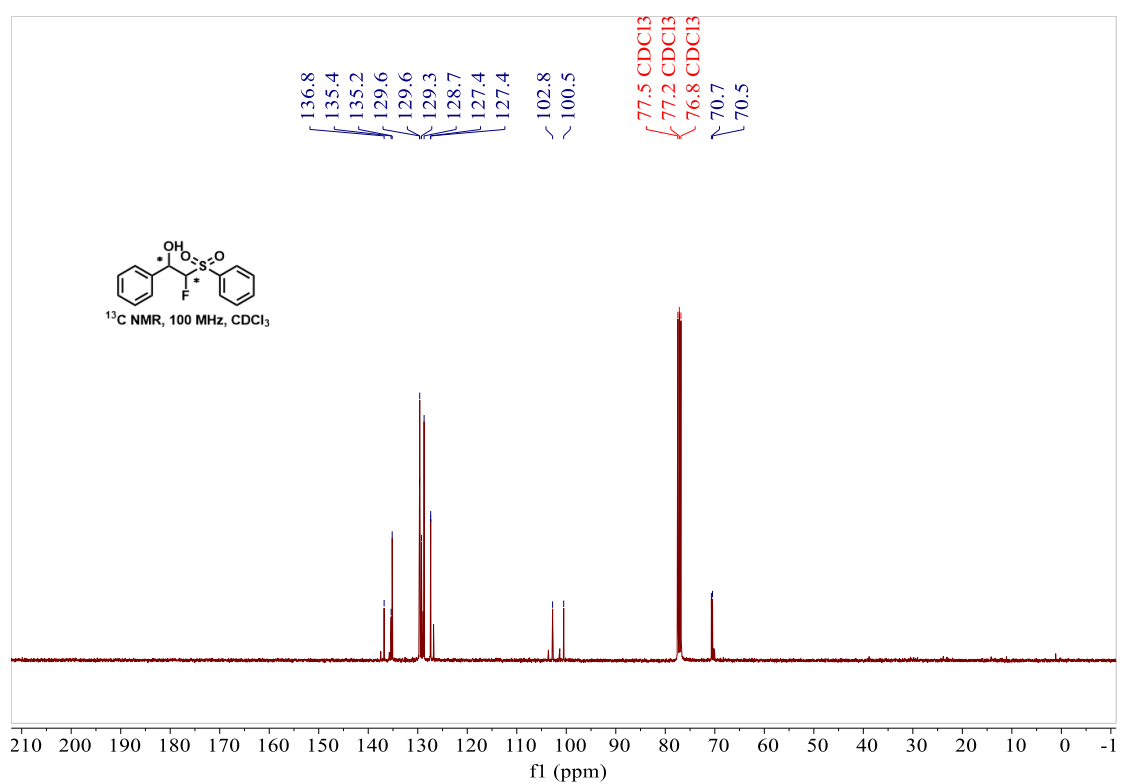

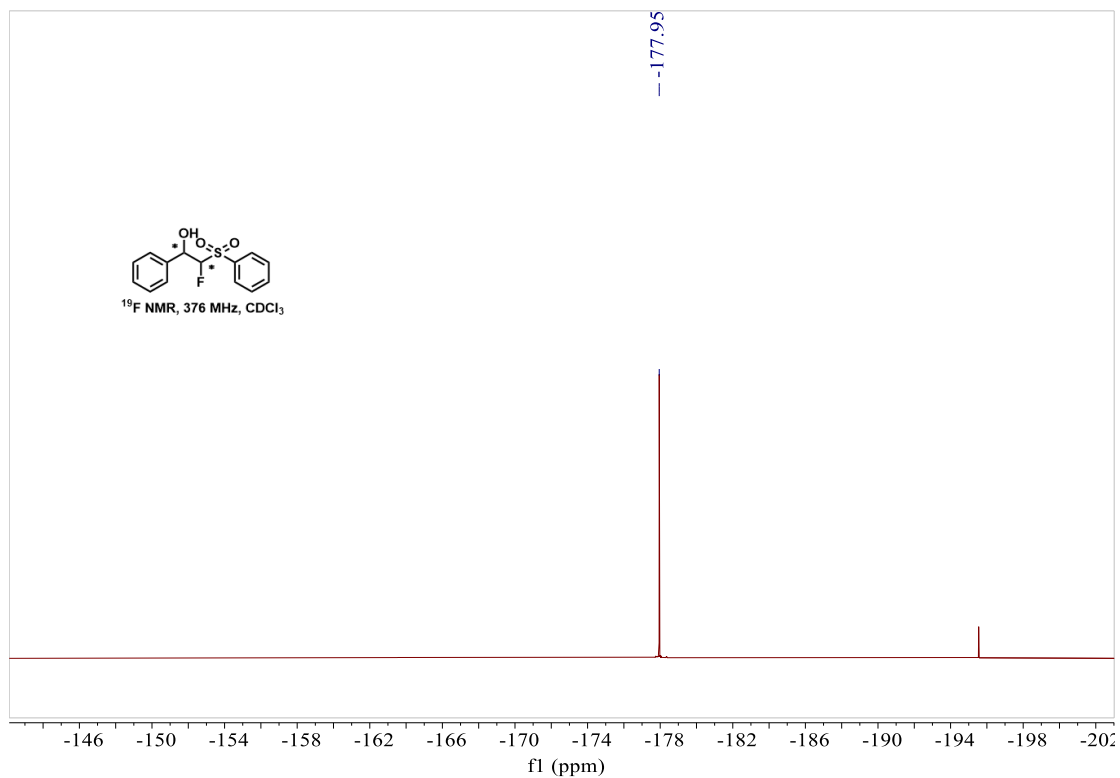

**(1*S*,2*S*)-2-fluoro-1-phenylpropane-1,3-diol (5a):**

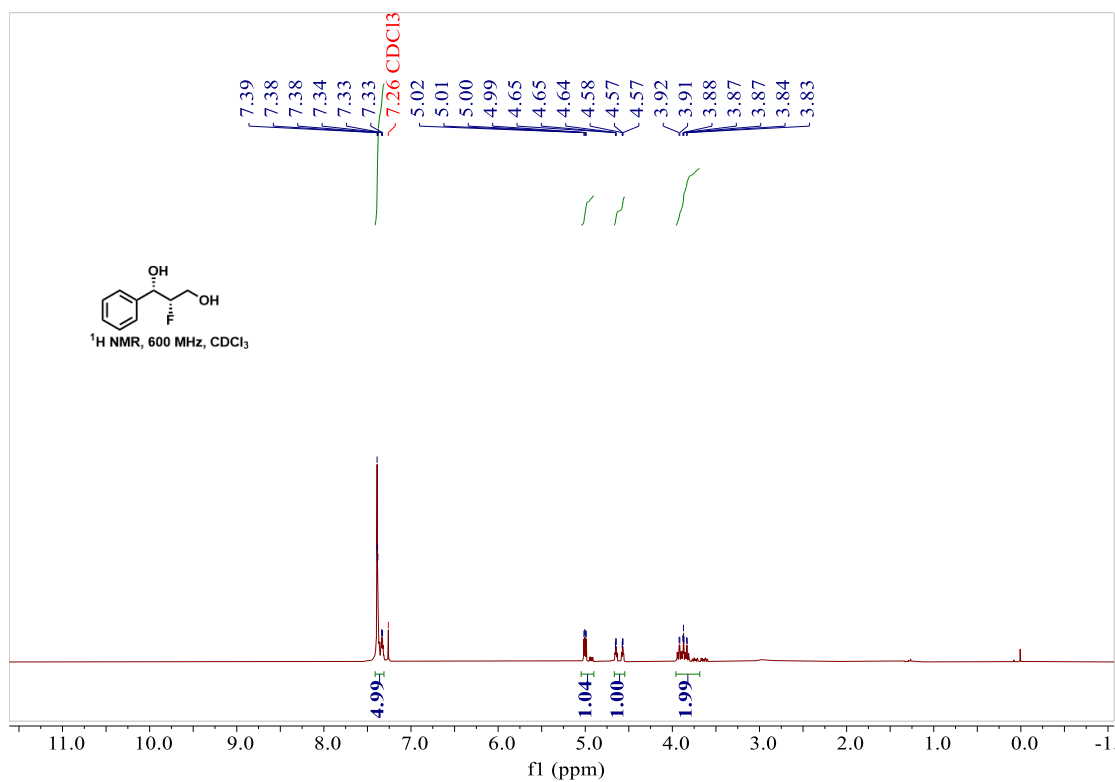

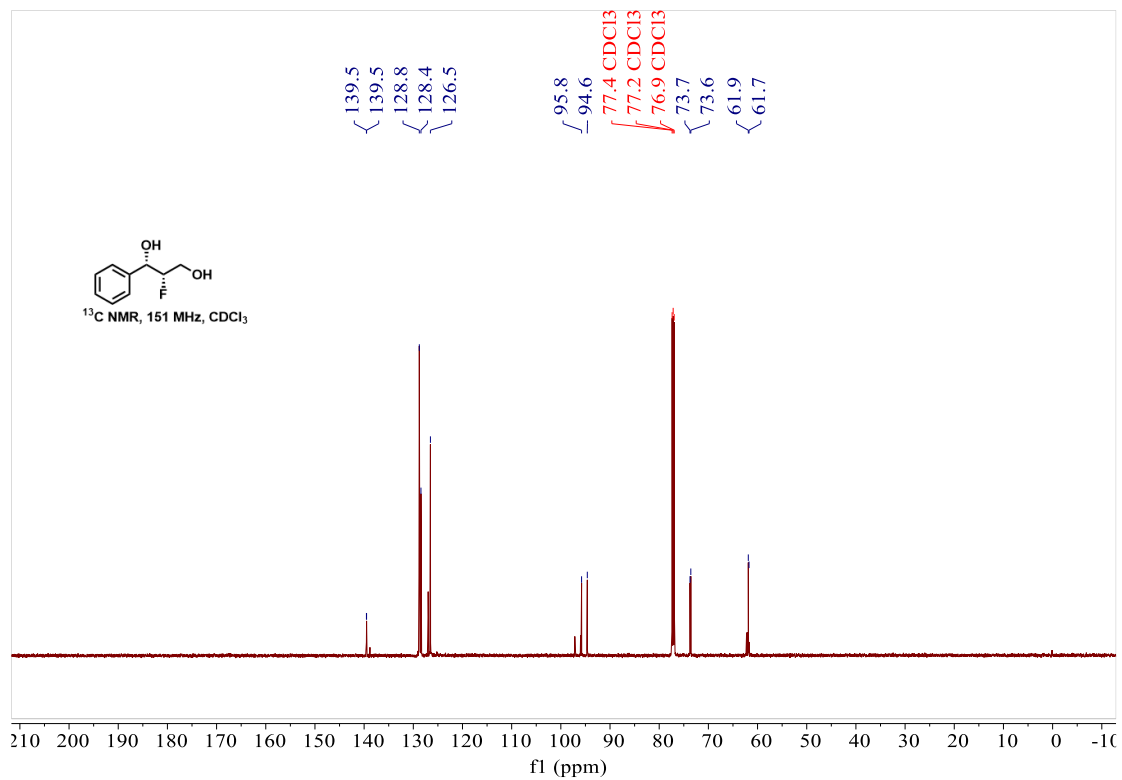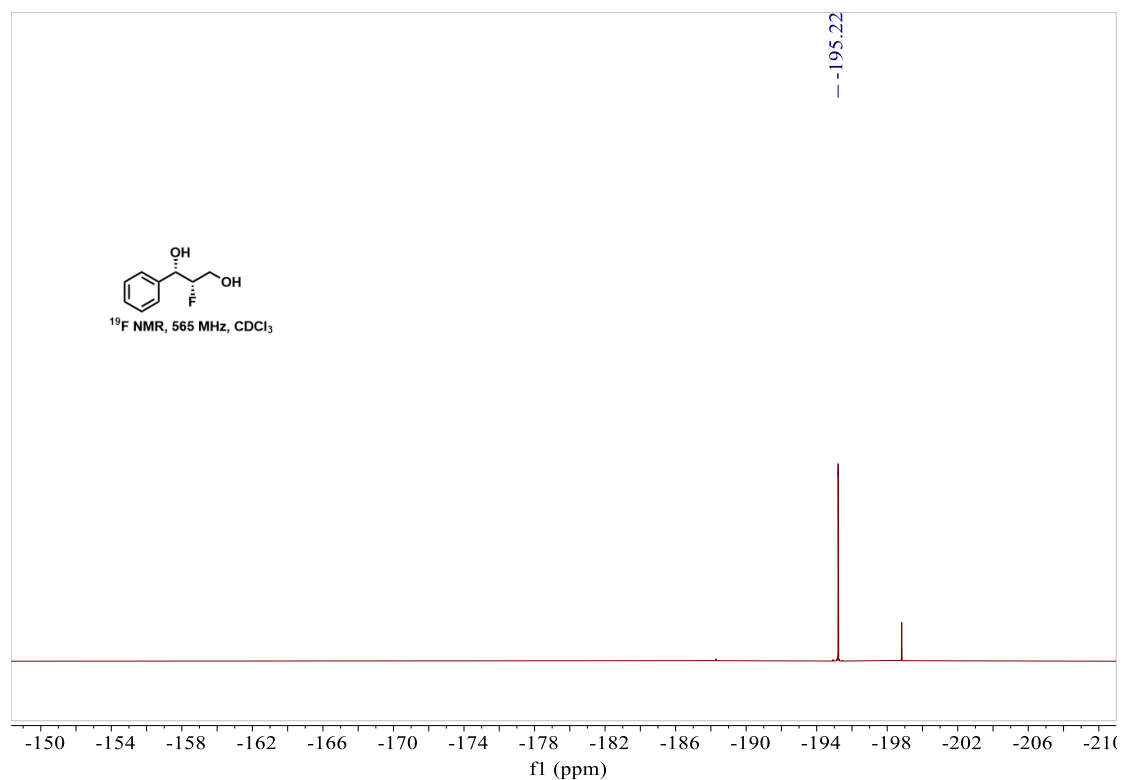

**(S)-(R)-1-methylaziridin-2-yl(phenyl)methanol (5b):**

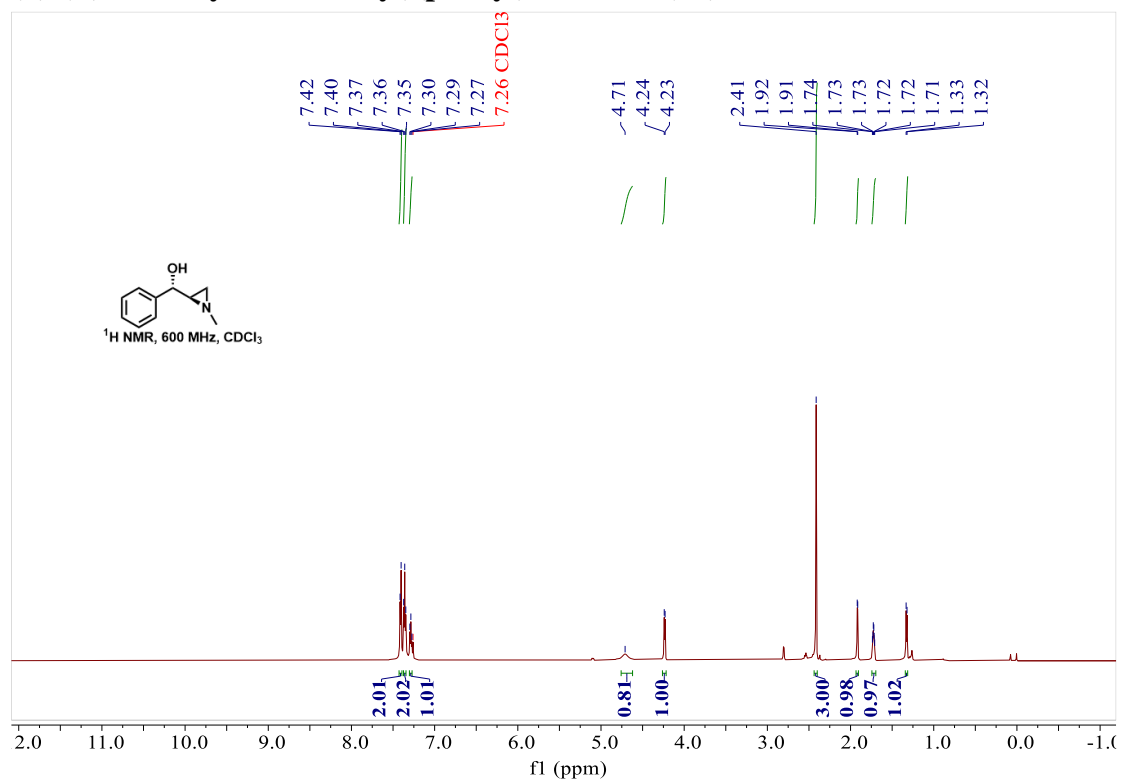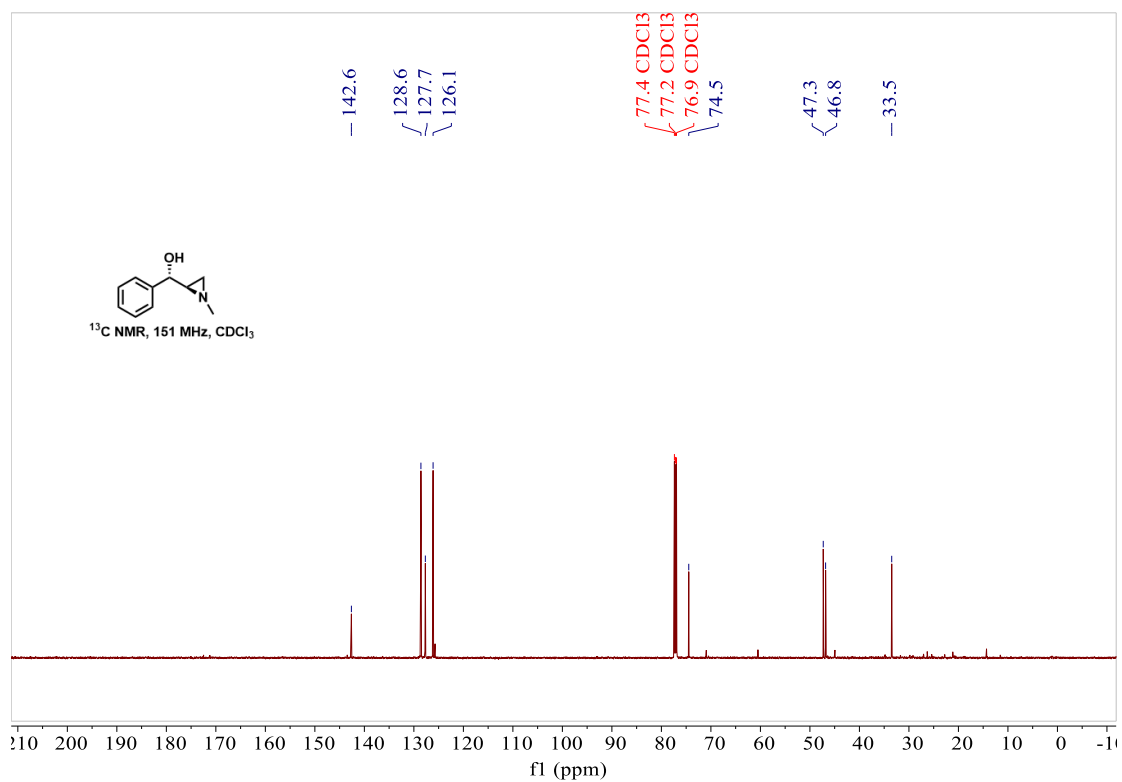



## 9. Copies of HPLC charts

### (2*S*,3*S*)-2-fluoro-3-hydroxy-*N,N*-dimethyl-3-phenylpropanamide (2a):

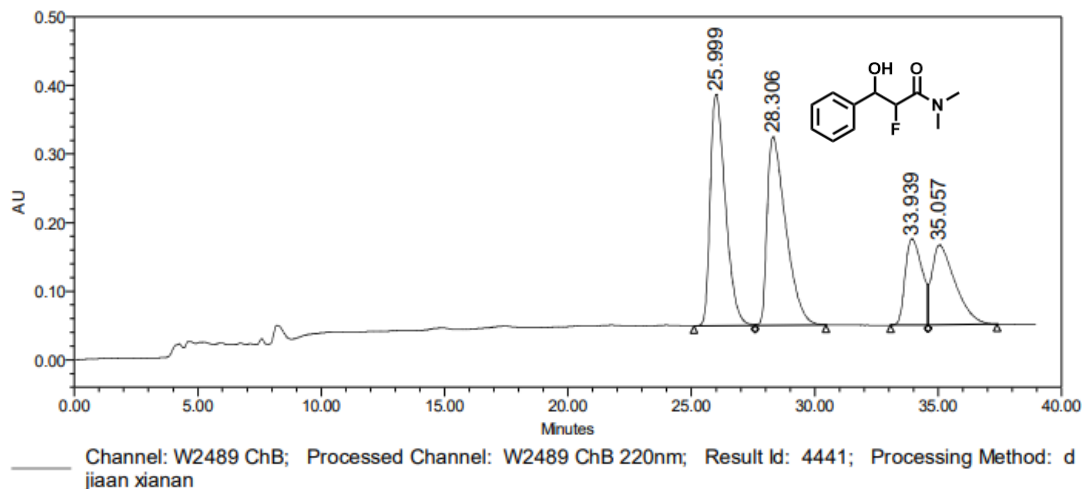

#### Processed Channel: W2489 ChB 220nm

|   | Processed Channel | Retention Time (min) | Area     | % Area | Height |
|---|-------------------|----------------------|----------|--------|--------|
| 1 | W2489 ChB 220nm   | 25.999               | 14394929 | 33.87  | 336816 |
| 2 | W2489 ChB 220nm   | 28.306               | 14442780 | 33.98  | 274397 |
| 3 | W2489 ChB 220nm   | 33.939               | 5964574  | 14.03  | 125449 |
| 4 | W2489 ChB 220nm   | 35.057               | 7701341  | 18.12  | 116272 |

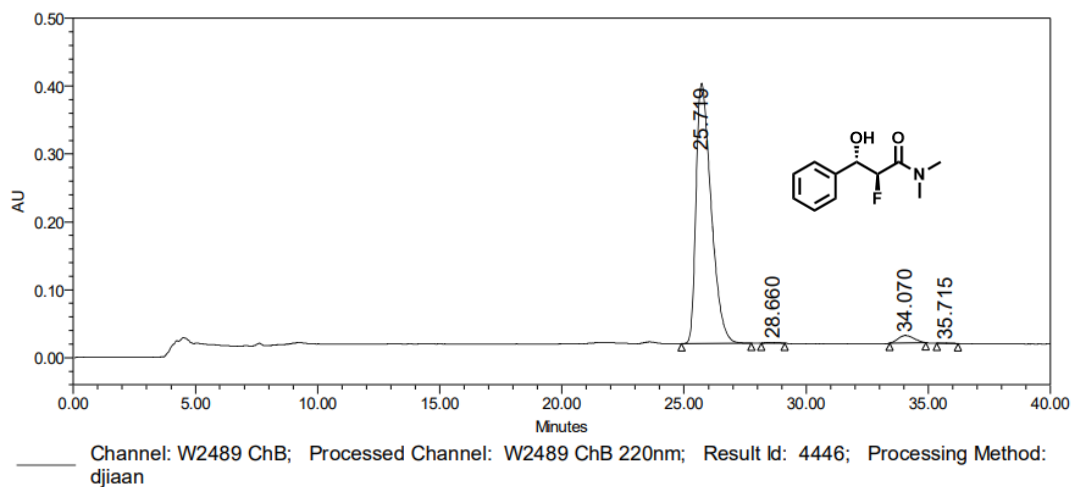

#### Processed Channel: W2489 ChB 220nm

|   | Processed Channel | Retention Time (min) | Area     | % Area | Height |
|---|-------------------|----------------------|----------|--------|--------|
| 1 | W2489 ChB 220nm   | 25.719               | 16456060 | 96.81  | 382944 |
| 2 | W2489 ChB 220nm   | 28.660               | 36751    | 0.22   | 1138   |
| 3 | W2489 ChB 220nm   | 34.070               | 492977   | 2.90   | 10831  |
| 4 | W2489 ChB 220nm   | 35.715               | 12670    | 0.07   | 437    |

**(2*S*,3*S*)-3-(4-bromophenyl)-2-fluoro-3-hydroxy-*N,N*-dimethylpropanamide (2b):**

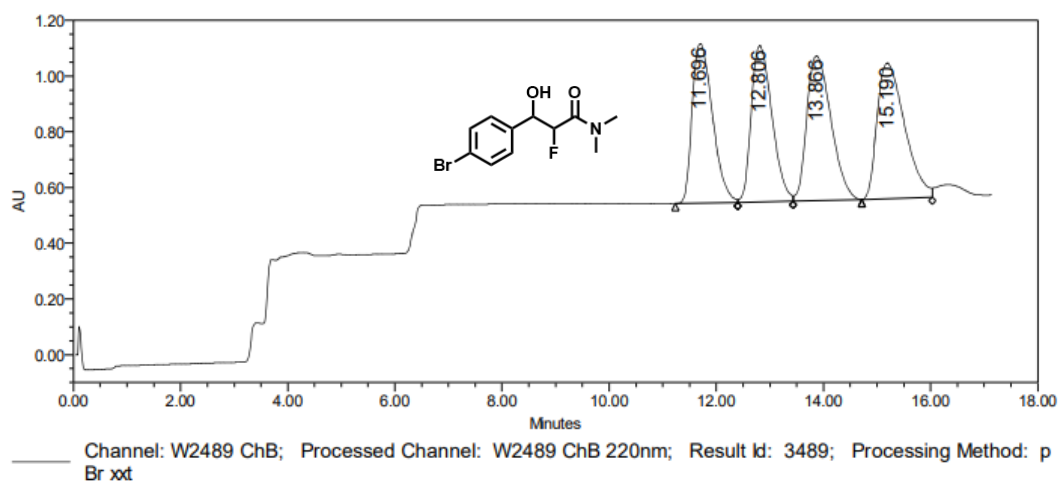

**Processed Channel: W2489 ChB 220nm**

|   | Processed Channel | Retention Time (min) | Area     | % Area | Height |
|---|-------------------|----------------------|----------|--------|--------|
| 1 | W2489 ChB 220nm   | 11.696               | 15171478 | 23.68  | 572660 |
| 2 | W2489 ChB 220nm   | 12.806               | 15104528 | 23.57  | 559828 |
| 3 | W2489 ChB 220nm   | 13.866               | 16390648 | 25.58  | 519264 |
| 4 | W2489 ChB 220nm   | 15.190               | 17412709 | 27.17  | 486890 |

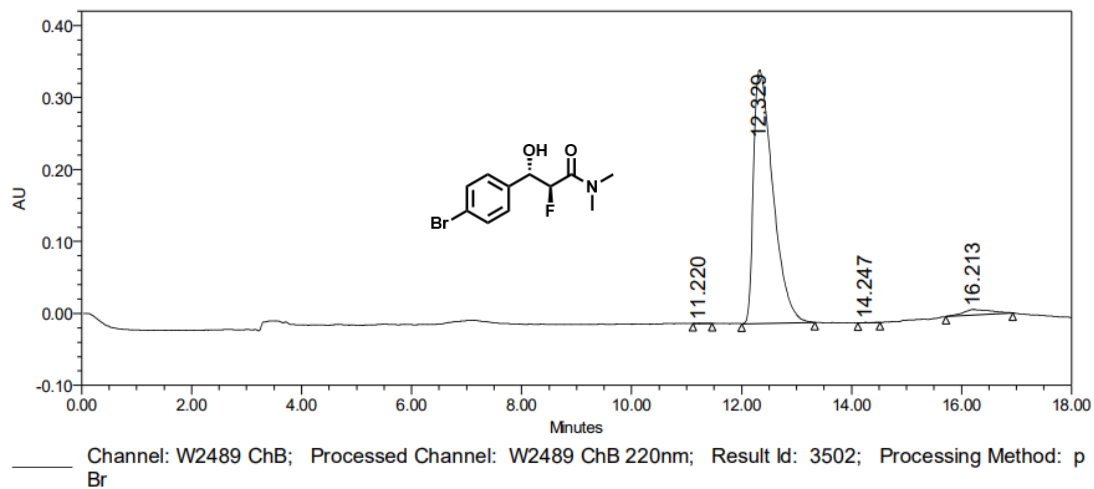

**Processed Channel: W2489 ChB 220nm**

|   | Processed Channel | Retention Time (min) | Area    | % Area | Height |
|---|-------------------|----------------------|---------|--------|--------|
| 1 | W2489 ChB 220nm   | 11.220               | 6931    | 0.08   | 489    |
| 2 | W2489 ChB 220nm   | 12.329               | 8593198 | 96.91  | 351976 |
| 3 | W2489 ChB 220nm   | 14.247               | 2786    | 0.03   | 294    |
| 4 | W2489 ChB 220nm   | 16.213               | 263946  | 2.98   | 7448   |

**(2*S*,3*S*)-3-(3-bromophenyl)-2-fluoro-3-hydroxy-*N,N*-dimethylpropanamide (2c):**

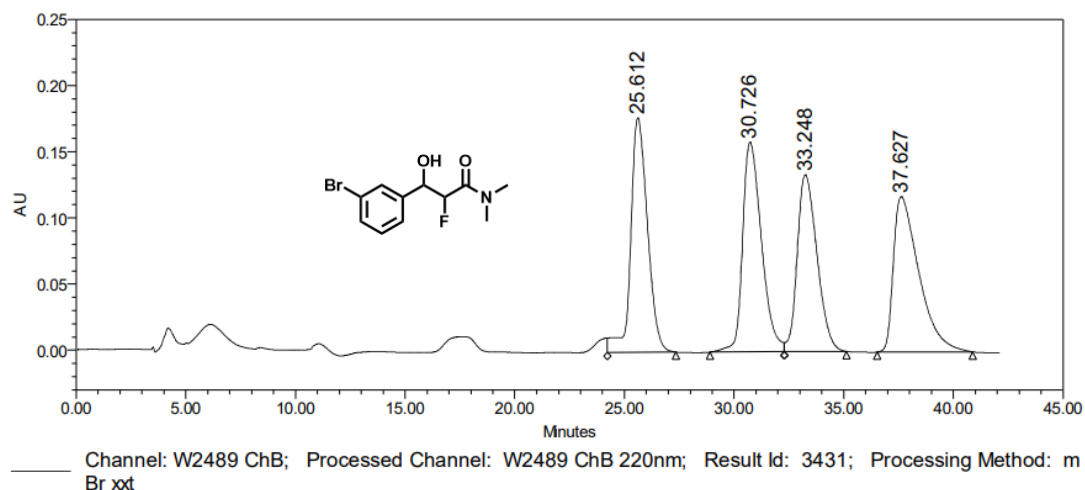

**Processed Channel: W2489 ChB 220nm**

|   | Processed Channel | Retention Time (min) | Area    | % Area | Height |
|---|-------------------|----------------------|---------|--------|--------|
| 1 | W2489 ChB 220nm   | 25.612               | 9476774 | 25.75  | 177097 |
| 2 | W2489 ChB 220nm   | 30.726               | 9469339 | 25.73  | 158524 |
| 3 | W2489 ChB 220nm   | 33.248               | 8375799 | 22.76  | 133477 |
| 4 | W2489 ChB 220nm   | 37.627               | 9485275 | 25.77  | 117392 |

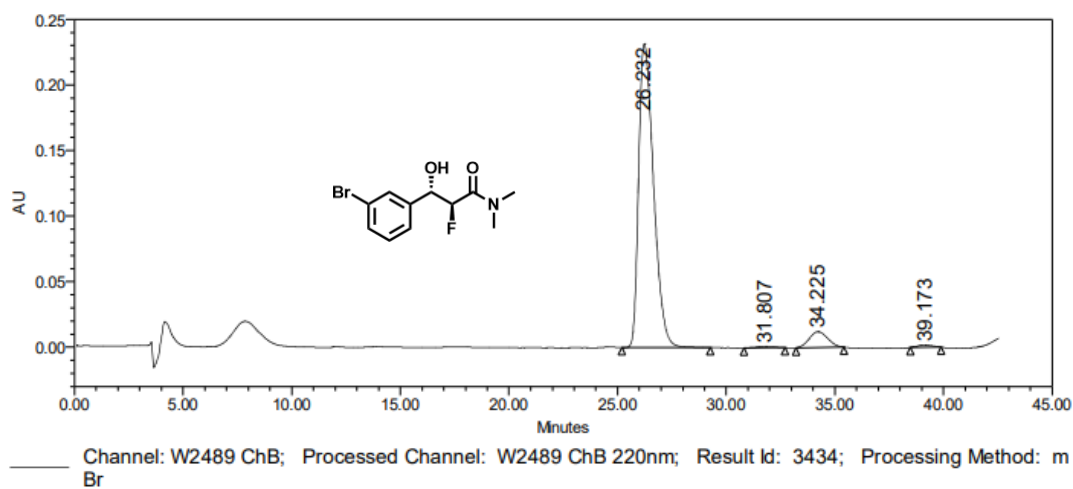

**Processed Channel: W2489 ChB 220nm**

|   | Processed Channel | Retention Time (min) | Area     | % Area | Height |
|---|-------------------|----------------------|----------|--------|--------|
| 1 | W2489 ChB 220nm   | 26.232               | 10966543 | 92.78  | 231712 |
| 2 | W2489 ChB 220nm   | 31.807               | 60065    | 0.51   | 1083   |
| 3 | W2489 ChB 220nm   | 34.225               | 712095   | 6.02   | 12076  |
| 4 | W2489 ChB 220nm   | 39.173               | 81549    | 0.69   | 1681   |

**(2S,3S)-3-(2-bromophenyl)-2-fluoro-3-hydroxy-N,N-dimethylpropanamide (2d):**

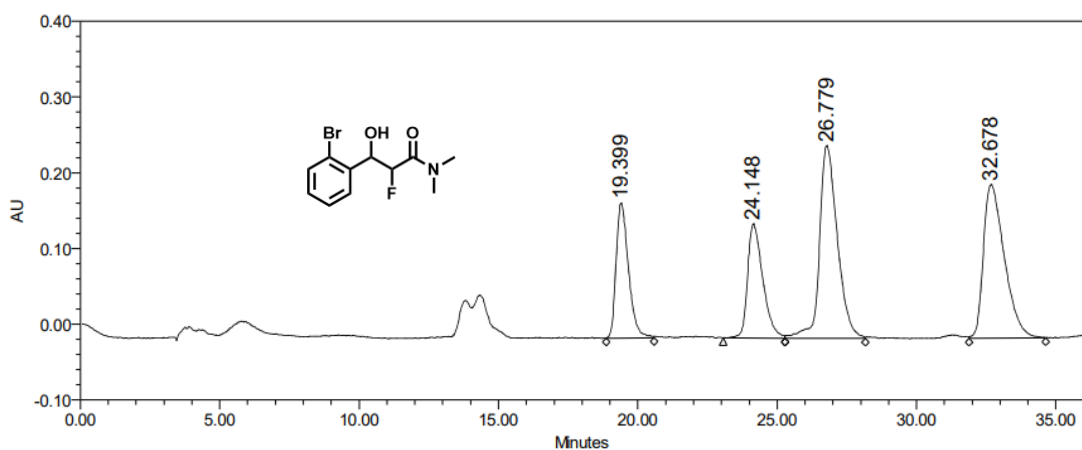

**Processed Channel: W2489 ChB 220nm**

| Processed Channel | Retention Time (min) | Area     | % Area | Height |
|-------------------|----------------------|----------|--------|--------|
| 1 W2489 ChB 220nm | 19.399               | 5524347  | 16.63  | 178444 |
| 2 W2489 ChB 220nm | 24.148               | 5746499  | 17.30  | 151008 |
| 3 W2489 ChB 220nm | 26.779               | 11337511 | 34.12  | 254236 |
| 4 W2489 ChB 220nm | 32.678               | 10616803 | 31.95  | 202812 |

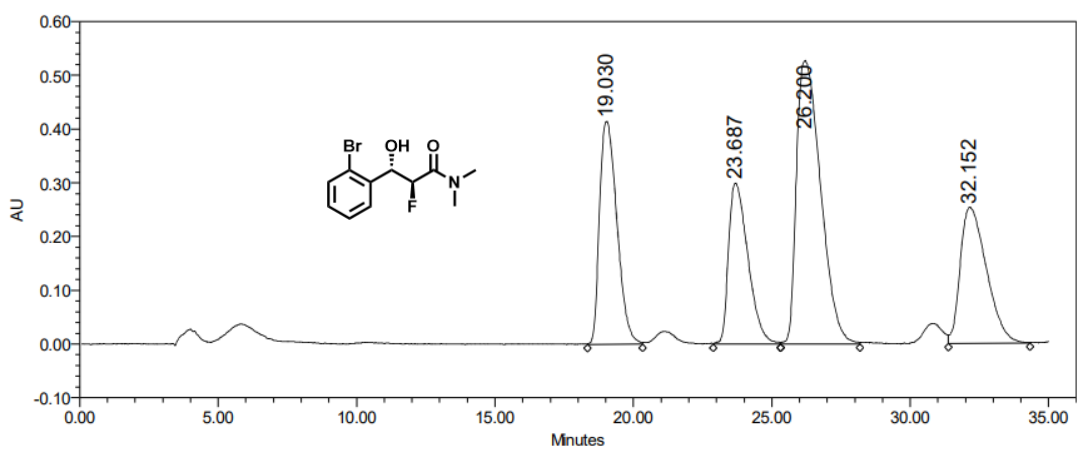

**Processed Channel: W2489 ChB 220nm**

| Processed Channel | Retention Time (min) | Area     | % Area | Height |
|-------------------|----------------------|----------|--------|--------|
| 1 W2489 ChB 220nm | 19.030               | 18122760 | 22.23  | 414845 |
| 2 W2489 ChB 220nm | 23.687               | 14683875 | 18.01  | 299745 |
| 3 W2489 ChB 220nm | 26.200               | 32017765 | 39.27  | 527458 |
| 4 W2489 ChB 220nm | 32.152               | 16697856 | 20.48  | 253023 |

**(2S,3S)-2-fluoro-3-(4-fluorophenyl)-3-hydroxy-N,N-dimethylpropanamide (2e):**

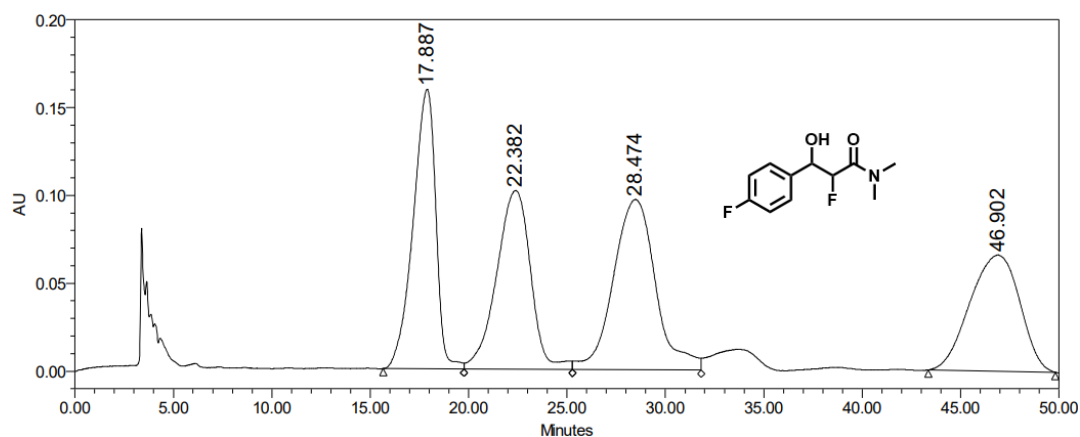

**Processed Channel: W2489 ChA 210nm**

|   | Processed Channel | Retention Time (min) | Area     | % Area | Height |
|---|-------------------|----------------------|----------|--------|--------|
| 1 | W2489 ChA 210nm   | 17.887               | 12771103 | 25.00  | 159094 |
| 2 | W2489 ChA 210nm   | 22.382               | 12247665 | 23.98  | 101577 |
| 3 | W2489 ChA 210nm   | 28.474               | 14444587 | 28.28  | 96814  |
| 4 | W2489 ChA 210nm   | 46.902               | 11619954 | 22.75  | 65989  |

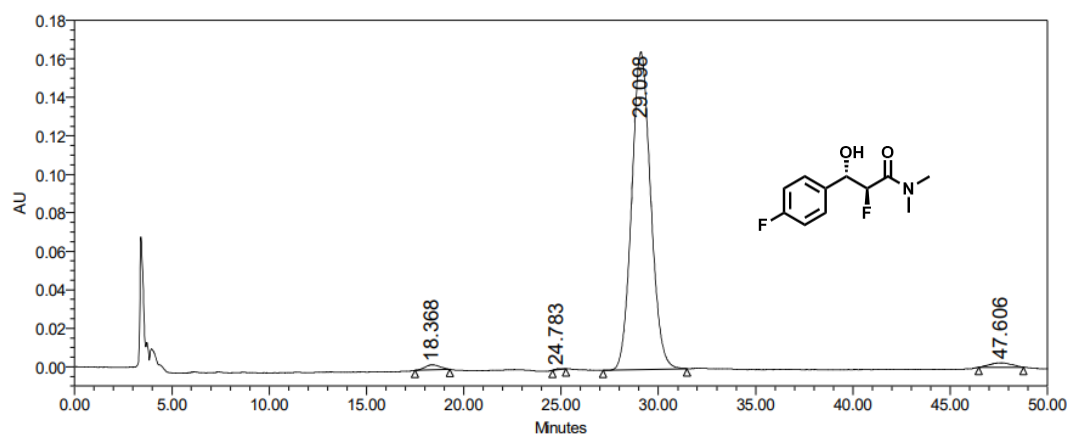

**Processed Channel: W2489 ChA 210nm**

|   | Processed Channel | Retention Time (min) | Area     | % Area | Height |
|---|-------------------|----------------------|----------|--------|--------|
| 1 | W2489 ChA 210nm   | 18.368               | 144432   | 1.26   | 2680   |
| 2 | W2489 ChA 210nm   | 24.783               | 8688     | 0.08   | 386    |
| 3 | W2489 ChA 210nm   | 29.098               | 11152681 | 97.15  | 164942 |
| 4 | W2489 ChA 210nm   | 47.606               | 174578   | 1.52   | 2245   |

**(2*S*,3*S*)-2-fluoro-3-hydroxy-*N,N*-dimethyl-3-(4-(trifluoromethyl)phenyl)propane-  
mide (2f):**

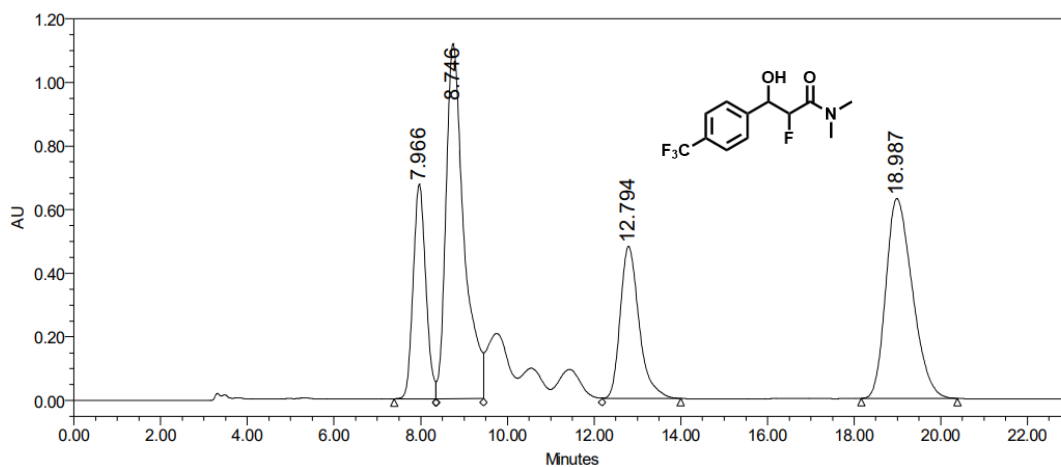

**Processed Channel: W2489 ChB 220nm**

|   | Processed Channel | Retention Time (min) | Area     | % Area | Height  |
|---|-------------------|----------------------|----------|--------|---------|
| 1 | W2489 ChB 220nm   | 7.966                | 13718788 | 15.75  | 674335  |
| 2 | W2489 ChB 220nm   | 8.746                | 32183548 | 36.94  | 1116616 |
| 3 | W2489 ChB 220nm   | 12.794               | 14453525 | 16.59  | 478570  |
| 4 | W2489 ChB 220nm   | 18.987               | 26764015 | 30.72  | 628294  |

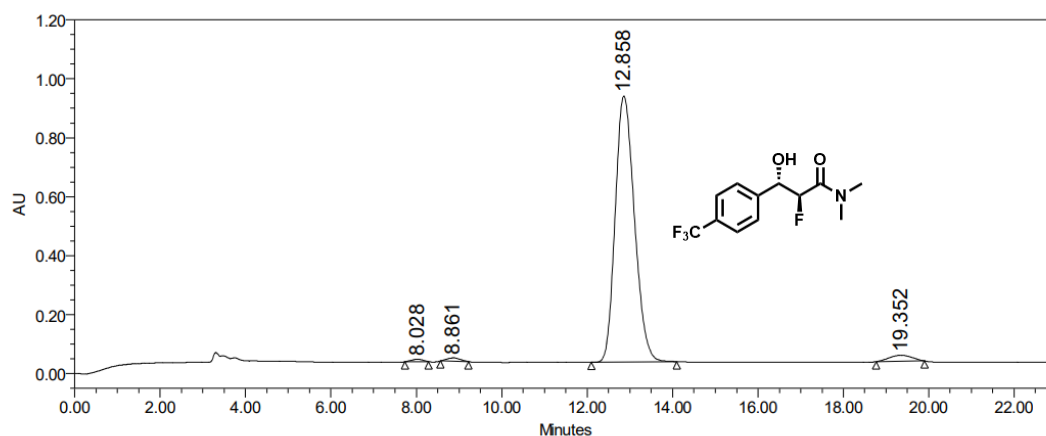

**Processed Channel: W2489 ChB 220nm**

|   | Processed Channel | Retention Time (min) | Area     | % Area | Height |
|---|-------------------|----------------------|----------|--------|--------|
| 1 | W2489 ChB 220nm   | 8.028                | 155397   | 0.53   | 8202   |
| 2 | W2489 ChB 220nm   | 8.861                | 245185   | 0.84   | 10962  |
| 3 | W2489 ChB 220nm   | 12.858               | 28206620 | 96.06  | 902411 |
| 4 | W2489 ChB 220nm   | 19.352               | 755471   | 2.57   | 20531  |

**(2*S*,3*S*)-3-(4-cyanophenyl)-2-fluoro-3-hydroxy-*N,N*-dimethylpropanamide (2g):**

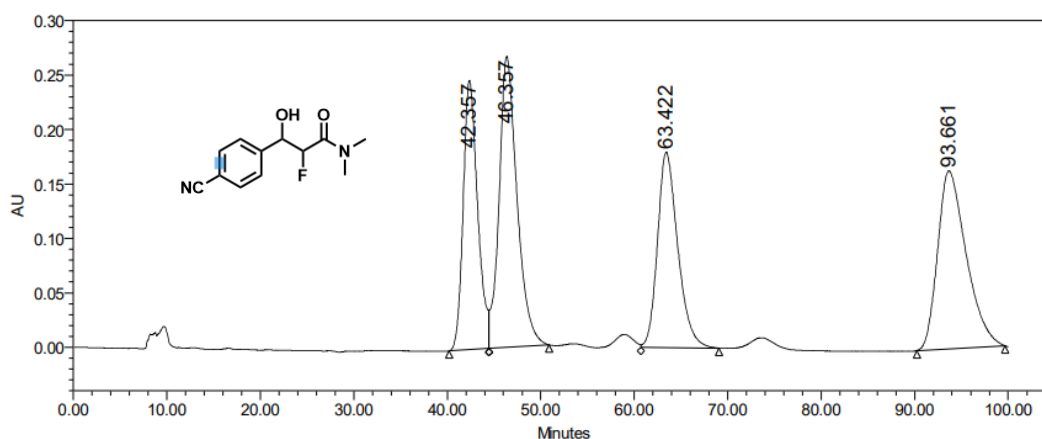

Channel: W2489 ChB; Processed Channel: W2489 ChB 220nm; Result Id: 4542; Processing Method: p CN xxt

**Processed Channel: W2489 ChB 220nm**

|   | Processed Channel | Retention Time (min) | Area     | % Area | Height |
|---|-------------------|----------------------|----------|--------|--------|
| 1 | W2489 ChB 220nm   | 42.357               | 26509667 | 21.38  | 247209 |
| 2 | W2489 ChB 220nm   | 46.357               | 35714900 | 28.80  | 267264 |
| 3 | W2489 ChB 220nm   | 63.422               | 27018224 | 21.79  | 179198 |
| 4 | W2489 ChB 220nm   | 93.661               | 34747296 | 28.02  | 163421 |

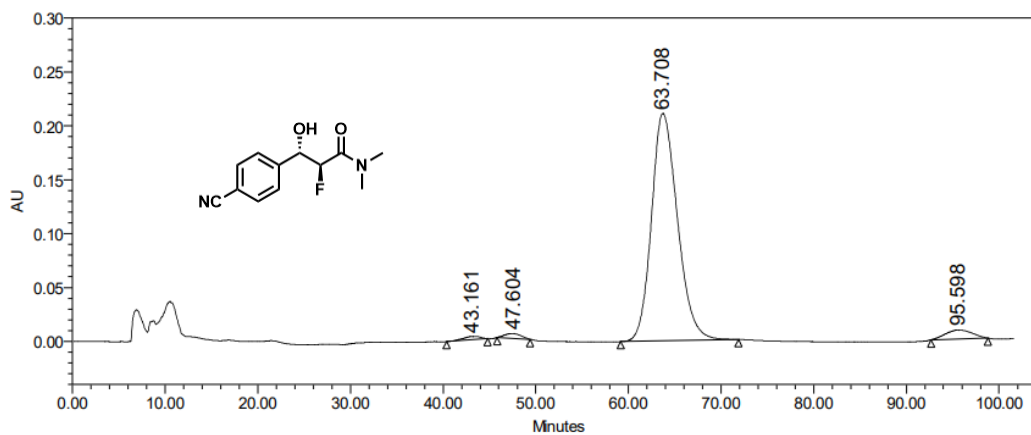

Channel: W2489 ChB; Processed Channel: W2489 ChB 220nm; Result Id: 4548; Processing Method: p CN

**Processed Channel: W2489 ChB 220nm**

|   | Processed Channel | Retention Time (min) | Area     | % Area | Height |
|---|-------------------|----------------------|----------|--------|--------|
| 1 | W2489 ChB 220nm   | 43.161               | 408859   | 0.93   | 3250   |
| 2 | W2489 ChB 220nm   | 47.604               | 546055   | 1.24   | 4515   |
| 3 | W2489 ChB 220nm   | 63.708               | 41257297 | 93.96  | 211083 |
| 4 | W2489 ChB 220nm   | 95.598               | 1697761  | 3.87   | 8425   |

**(2*S*,3*S*)-2-fluoro-3-hydroxy-*N,N*-dimethyl-3-(4-nitrophenyl)propenamide (2h):**

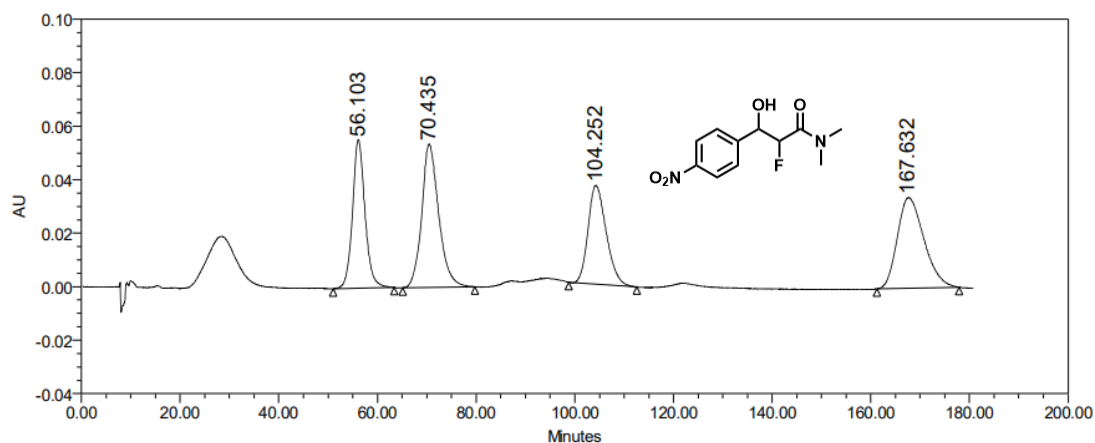

**Processed Channel: W2489 ChA 254nm**

|   | Processed Channel | Retention Time (min) | Area     | % Area | Height |
|---|-------------------|----------------------|----------|--------|--------|
| 1 | W2489 ChA 254nm   | 56.103               | 9744899  | 21.70  | 55483  |
| 2 | W2489 ChA 254nm   | 70.435               | 12942742 | 28.83  | 53619  |
| 3 | W2489 ChA 254nm   | 104.252              | 9517212  | 21.20  | 36931  |
| 4 | W2489 ChA 254nm   | 167.632              | 12694198 | 28.27  | 33916  |

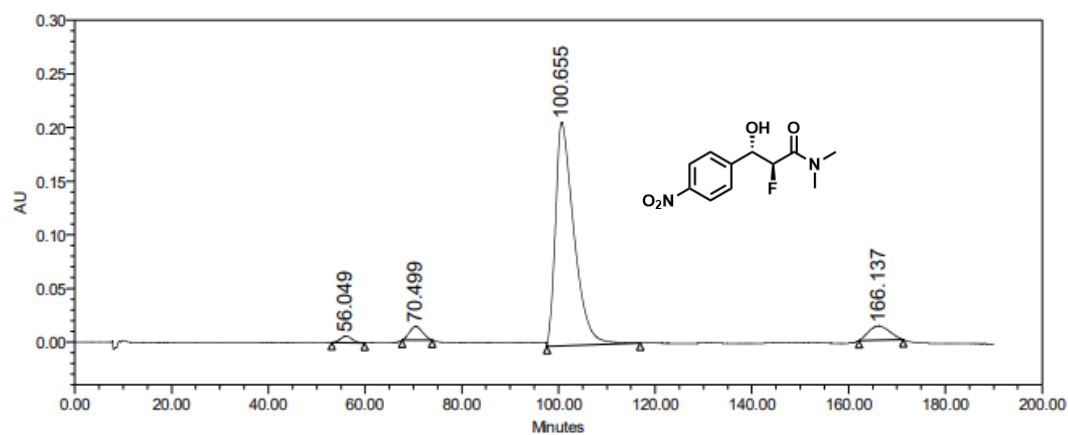

**Processed Channel: W2489 ChA 254nm**

|   | Processed Channel | Retention Time (min) | Area     | % Area | Height |
|---|-------------------|----------------------|----------|--------|--------|
| 1 | W2489 ChA 254nm   | 56.049               | 1043353  | 1.66   | 6140   |
| 2 | W2489 ChA 254nm   | 70.499               | 2416374  | 3.85   | 12778  |
| 3 | W2489 ChA 254nm   | 100.655              | 55305266 | 88.17  | 208273 |
| 4 | W2489 ChA 254nm   | 166.137              | 3962062  | 6.32   | 13177  |



**(2*S*,3*S*)-3-(4-chlorophenyl)-2-fluoro-3-hydroxy-*N,N*-dimethylpropanamide (2i):**

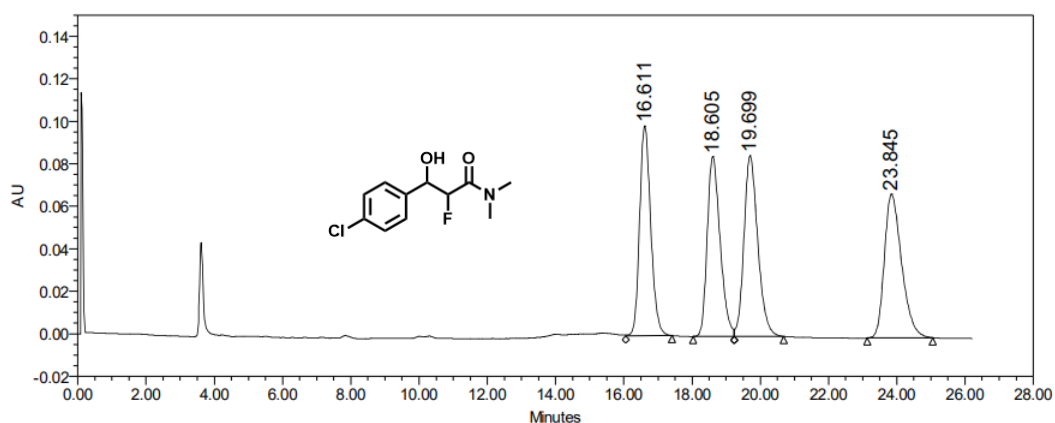

Channel: W2489 ChB; Processed Channel: W2489 ChB 220nm; Result Id: 3237; Processing Method: p  
Cl xxt

**Processed Channel: W2489 ChB 220nm**

|   | Processed Channel | Retention Time (min) | Area    | % Area | Height |
|---|-------------------|----------------------|---------|--------|--------|
| 1 | W2489 ChB 220nm   | 16.611               | 2239707 | 24.28  | 98945  |
| 2 | W2489 ChB 220nm   | 18.605               | 2214166 | 24.00  | 84745  |
| 3 | W2489 ChB 220nm   | 19.699               | 2396236 | 25.97  | 85043  |
| 4 | W2489 ChB 220nm   | 23.845               | 2375415 | 25.75  | 67682  |

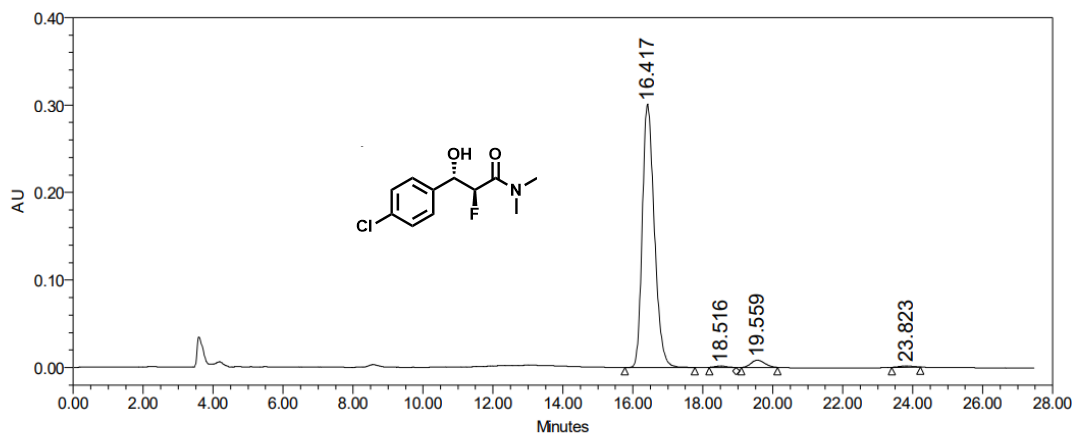

Channel: W2489 ChB; Processed Channel: W2489 ChB 220nm; Result Id: 3245; Processing Method: p  
Cl

**Processed Channel: W2489 ChB 220nm**

|   | Processed Channel | Retention Time (min) | Area    | % Area | Height |
|---|-------------------|----------------------|---------|--------|--------|
| 1 | W2489 ChB 220nm   | 16.417               | 7174942 | 95.97  | 300737 |
| 2 | W2489 ChB 220nm   | 18.516               | 35626   | 0.48   | 1595   |
| 3 | W2489 ChB 220nm   | 19.559               | 226310  | 3.03   | 8292   |
| 4 | W2489 ChB 220nm   | 23.823               | 39466   | 0.53   | 1435   |

**(2S,3S)-2-fluoro-3-hydroxy-N,N-dimethyl-3-(p-tolyl)propanamide (2j):**

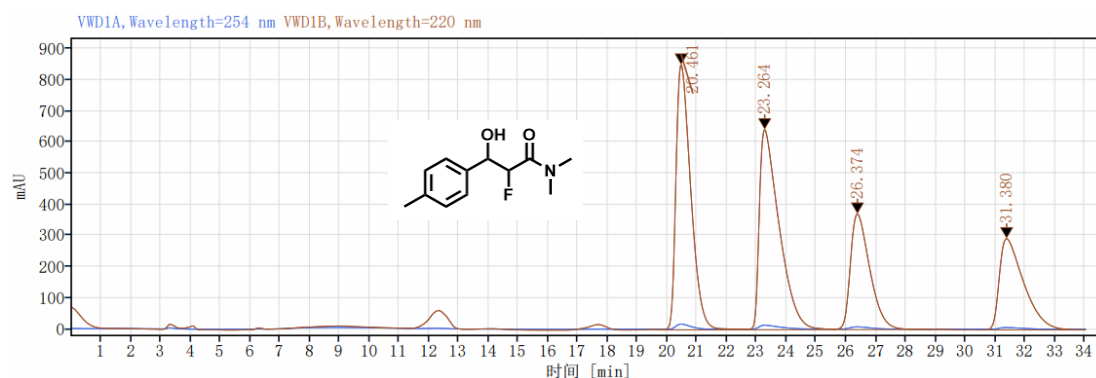

信号: VWD1B, Wavelength=220 nm

| 保留时间 [min] | 类型  | 峰宽 [min] | 峰面积             | 峰高     | 峰面积%  | 名称 |
|------------|-----|----------|-----------------|--------|-------|----|
| 20.461     | VV  | 2.85     | 29425.48        | 851.09 | 31.80 |    |
| 23.264     | VV  | 2.89     | 29642.43        | 642.50 | 32.04 |    |
| 26.374     | VB  | 3.31     | 16801.39        | 371.50 | 18.16 |    |
| 31.380     | BBA | 3.55     | 16652.36        | 293.20 | 18.00 |    |
| <b>总和</b>  |     |          | <b>92521.67</b> |        |       |    |

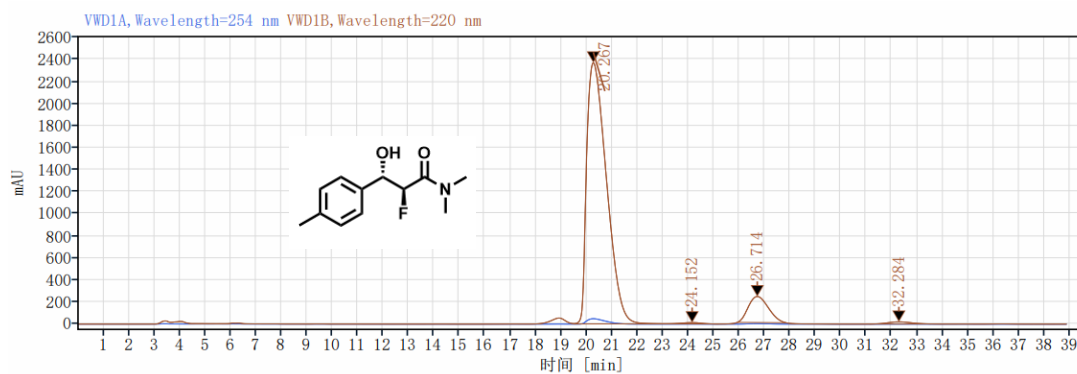

信号: VWD1B, Wavelength=220 nm

| 保留时间 [min] | 类型   | 峰宽 [min] | 峰面积              | 峰高      | 峰面积%  | 名称 |
|------------|------|----------|------------------|---------|-------|----|
| 20.267     | VB   | 3.59     | 128198.22        | 2372.32 | 89.66 |    |
| 24.152     | BB   | 2.11     | 613.88           | 11.81   | 0.43  |    |
| 26.714     | MM m | 1.91     | 12908.50         | 236.44  | 9.03  |    |
| 32.284     | MM m | 2.42     | 1260.28          | 19.69   | 0.88  |    |
| <b>总和</b>  |      |          | <b>142980.88</b> |         |       |    |

**(2*S*,3*S*)-2-fluoro-3-hydroxy-*N,N*-dimethyl-3-(*m*-tolyl)propanamide (2k):**

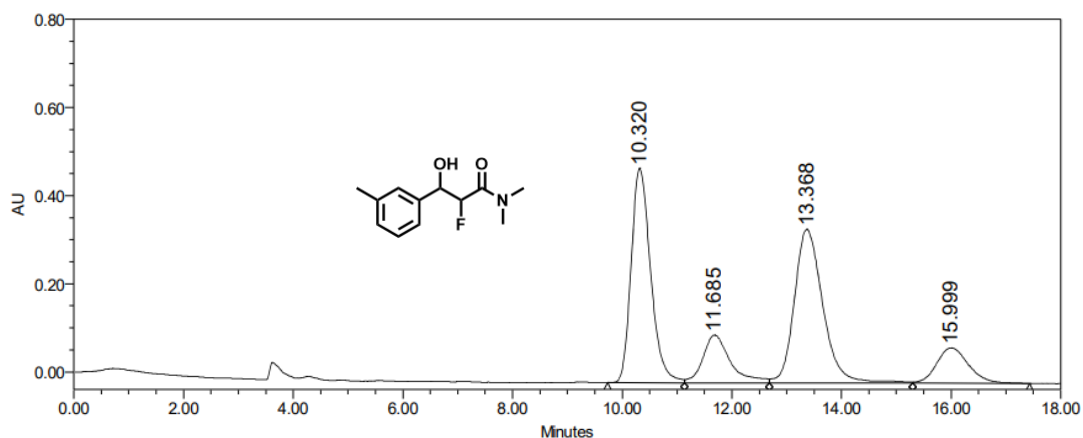

Channel: W2489 ChB; Processed Channel: W2489 ChB 220nm; Result Id: 4421; Processing Method: m Me xxt

**Processed Channel: W2489 ChB 220nm**

|   | Processed Channel | Retention Time (min) | Area     | % Area | Height |
|---|-------------------|----------------------|----------|--------|--------|
| 1 | W2489 ChB 220nm   | 10.320               | 12018139 | 37.83  | 487291 |
| 2 | W2489 ChB 220nm   | 11.685               | 3808487  | 11.99  | 109022 |
| 3 | W2489 ChB 220nm   | 13.368               | 12678317 | 39.91  | 349198 |
| 4 | W2489 ChB 220nm   | 15.999               | 3263323  | 10.27  | 80515  |

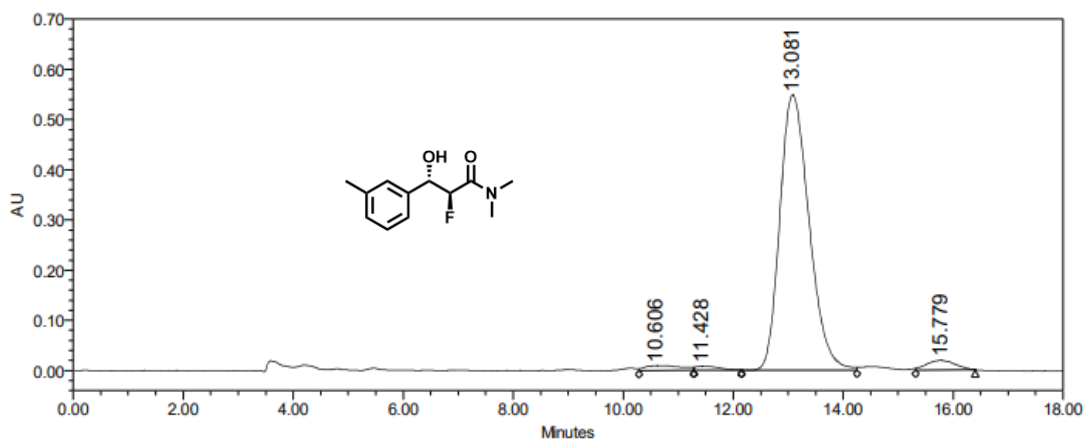

Channel: W2489 ChB; Processed Channel: W2489 ChB 220nm; Result Id: 4431; Processing Method: m Me 1

**Processed Channel: W2489 ChB 220nm**

|   | Processed Channel | Retention Time (min) | Area     | % Area | Height |
|---|-------------------|----------------------|----------|--------|--------|
| 1 | W2489 ChB 220nm   | 10.606               | 474835   | 2.19   | 10033  |
| 2 | W2489 ChB 220nm   | 11.428               | 263001   | 1.21   | 8130   |
| 3 | W2489 ChB 220nm   | 13.081               | 20291257 | 93.46  | 548333 |
| 4 | W2489 ChB 220nm   | 15.779               | 680922   | 3.14   | 18800  |

**(2S,3S)-2-fluoro-3-hydroxy-N,N-dimethyl-3-(*o*-tolyl)propanamide (2l):**

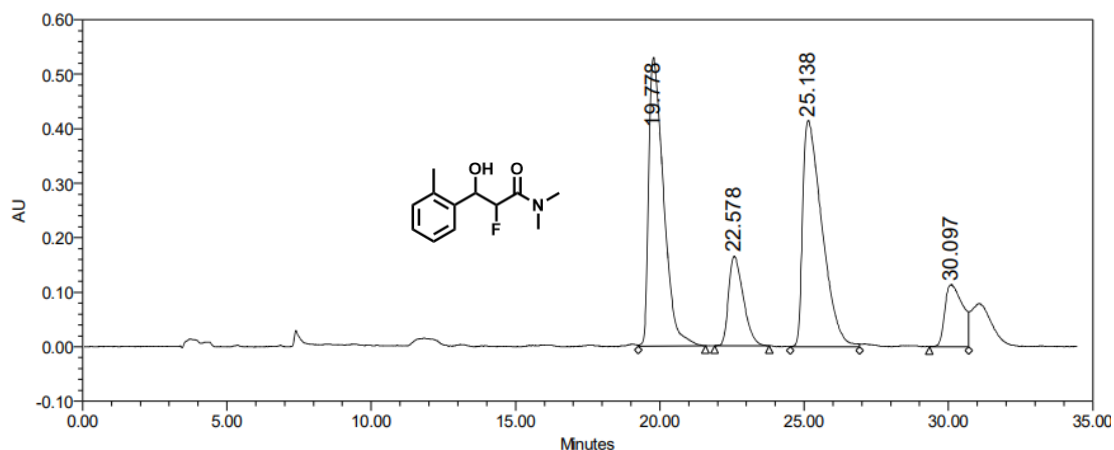

Channel: W2489 ChB; Processed Channel: W2489 ChB 220nm; Result Id: 3589; Processing Method: oi Me xxt

**Processed Channel: W2489 ChB 220nm**

|   | Processed Channel | Retention Time (min) | Area     | % Area | Height |
|---|-------------------|----------------------|----------|--------|--------|
| 1 | W2489 ChB 220nm   | 19.778               | 18948424 | 38.62  | 529023 |
| 2 | W2489 ChB 220nm   | 22.578               | 5865598  | 11.95  | 164631 |
| 3 | W2489 ChB 220nm   | 25.138               | 19350695 | 39.44  | 415007 |
| 4 | W2489 ChB 220nm   | 30.097               | 4900559  | 9.99   | 113692 |

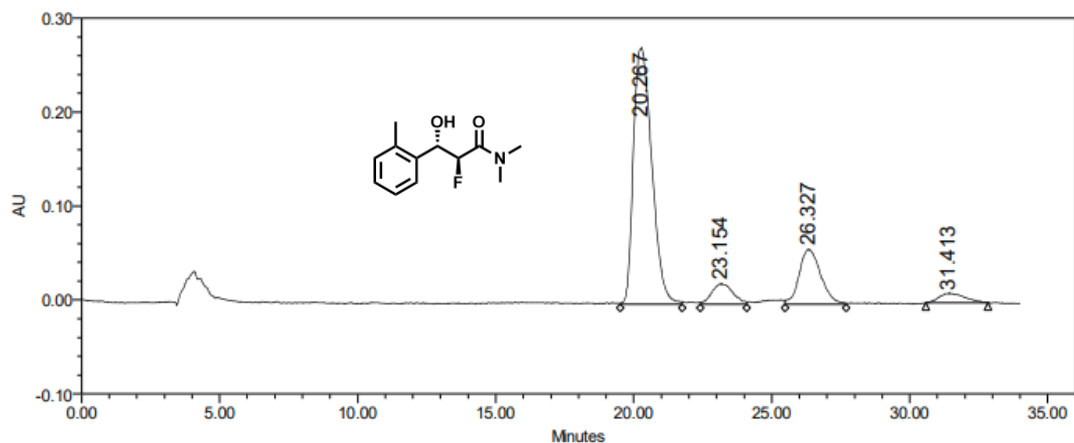

Channel: W2489 ChB; Processed Channel: W2489 ChB 220nm; Result Id: 3612; Processing Method: o Me

**Processed Channel: W2489 ChB 220nm**

|   | Processed Channel | Retention Time (min) | Area     | % Area | Height |
|---|-------------------|----------------------|----------|--------|--------|
| 1 | W2489 ChB 220nm   | 20.267               | 12615132 | 71.87  | 272222 |
| 2 | W2489 ChB 220nm   | 23.154               | 1138912  | 6.49   | 21369  |
| 3 | W2489 ChB 220nm   | 26.327               | 3132493  | 17.85  | 57978  |
| 4 | W2489 ChB 220nm   | 31.413               | 666838   | 3.80   | 10108  |

**(2S,3S)-2-fluoro-3-hydroxy-3-(4-methoxyphenyl)-N,N-dimethylpropanamide**

**(2m):**

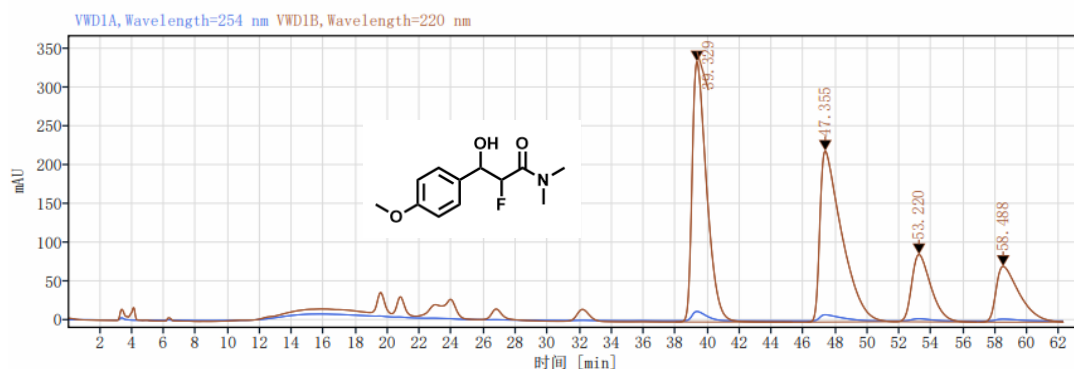

信号: VWD1B, Wavelength=220 nm

| 保留时间 [min] | 类型  | 峰宽 [min] | 峰面积             | 峰高     | 峰面积%  | 名称 |
|------------|-----|----------|-----------------|--------|-------|----|
| 39.329     | BB  | 7.30     | 21143.38        | 335.50 | 37.32 |    |
| 47.355     | BB  | 5.52     | 20977.49        | 220.38 | 37.02 |    |
| 53.220     | BB  | 5.08     | 7258.02         | 86.67  | 12.81 |    |
| 58.488     | BBA | 5.23     | 7279.59         | 71.83  | 12.85 |    |
| <b>总和</b>  |     |          | <b>56658.48</b> |        |       |    |

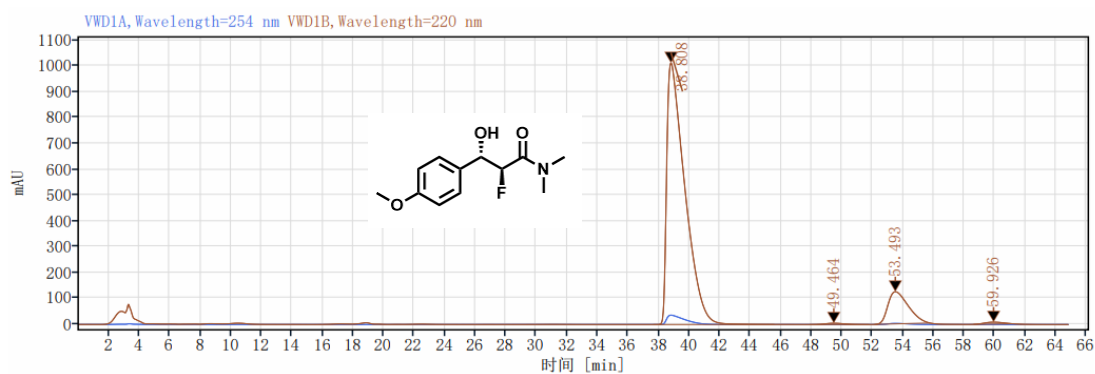

信号: VWD1B, Wavelength=220 nm

| 保留时间 [min] | 类型   | 峰宽 [min] | 峰面积             | 峰高      | 峰面积%  | 名称 |
|------------|------|----------|-----------------|---------|-------|----|
| 38.808     | BB   | 7.92     | 83111.09        | 1012.51 | 86.93 |    |
| 49.464     | BB   | 3.89     | 419.92          | 4.99    | 0.44  |    |
| 53.493     | MM m | 3.63     | 11453.21        | 124.43  | 11.98 |    |
| 59.926     | MM m | 2.59     | 621.79          | 7.42    | 0.65  |    |
| <b>总和</b>  |      |          | <b>95606.01</b> |         |       |    |

**(2*S*,3*S*)-3-(3,5-dimethylphenyl)-2-fluoro-3-hydroxy-*N,N*-dimethylpropanamide**

**(2n):**

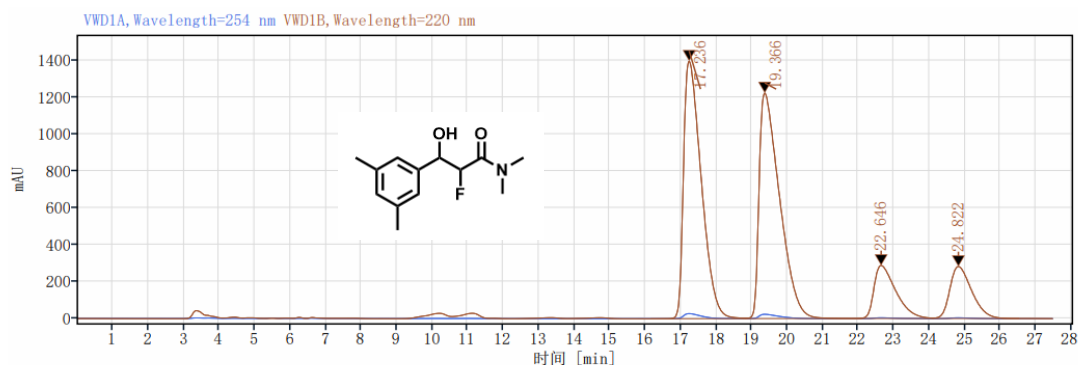

信号: VWD1B, Wavelength=220 nm

| 保留时间 [min] | 类型 | 峰宽 [min] | 峰面积              | 峰高      | 峰面积%  | 名称 |
|------------|----|----------|------------------|---------|-------|----|
| 17.236     | BV | 2.67     | 48739.07         | 1401.31 | 39.87 |    |
| 19.366     | VB | 2.99     | 49136.52         | 1227.13 | 40.19 |    |
| 22.646     | BV | 2.28     | 12285.10         | 288.44  | 10.05 |    |
| 24.822     | VB | 2.43     | 12096.18         | 282.77  | 9.89  |    |
| <b>总和</b>  |    |          | <b>122256.86</b> |         |       |    |

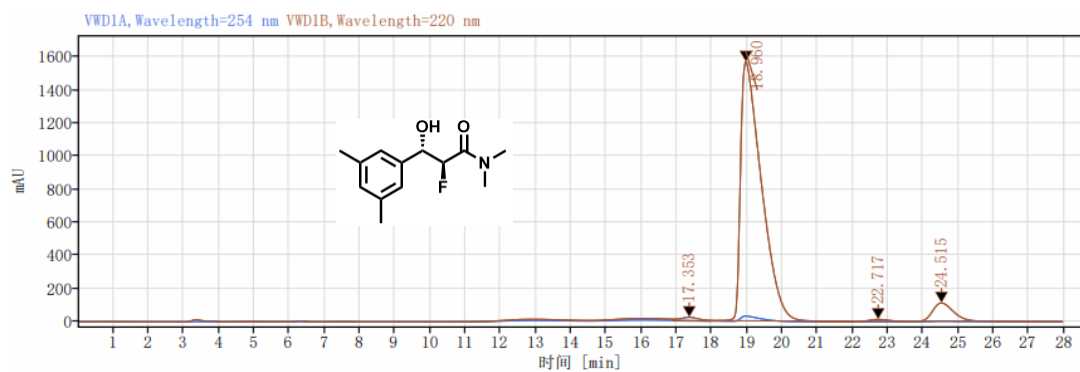

信号: VWD1B, Wavelength=220 nm

| 保留时间 [min] | 类型   | 峰宽 [min] | 峰面积             | 峰高      | 峰面积%  | 名称 |
|------------|------|----------|-----------------|---------|-------|----|
| 17.353     | MM m | 1.04     | 896.94          | 22.46   | 1.28  |    |
| 18.960     | MM m | 3.84     | 64180.98        | 1565.54 | 91.89 |    |
| 22.717     | MM m | 1.13     | 391.67          | 11.50   | 0.56  |    |
| 24.515     | MM m | 1.66     | 4378.13         | 109.52  | 6.27  |    |
| <b>总和</b>  |      |          | <b>69847.73</b> |         |       |    |

**(2S,3S)-N,N-diethyl-2-fluoro-3-hydroxy-3-phenylpropanamide (2o):**

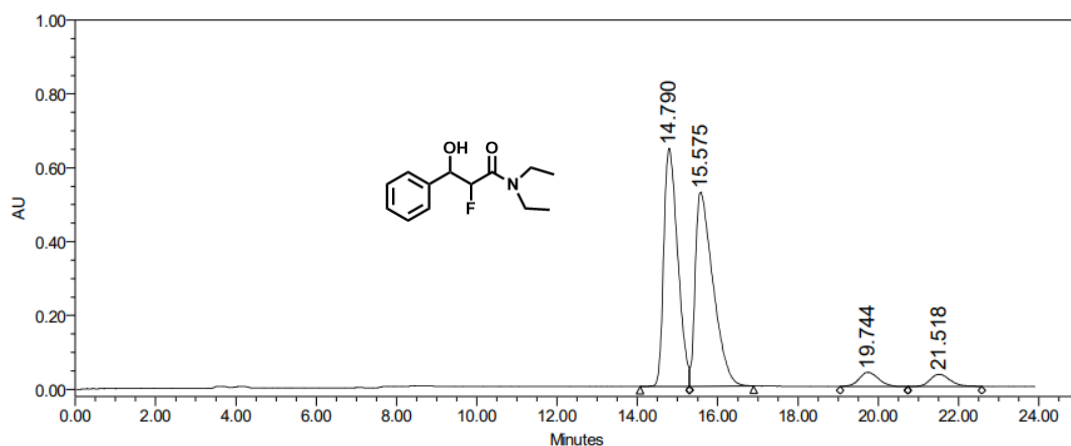

Channel: W2489 ChB; Processed Channel: W2489 ChB 220nm; Result Id: 4404; Processing Method: dyan xxt

**Processed Channel: W2489 ChB 220nm**

|   | Processed Channel | Retention Time (min) | Area     | % Area | Height |
|---|-------------------|----------------------|----------|--------|--------|
| 1 | W2489 ChB 220nm   | 14.790               | 15534758 | 45.45  | 644762 |
| 2 | W2489 ChB 220nm   | 15.575               | 16122376 | 47.17  | 525207 |
| 3 | W2489 ChB 220nm   | 19.744               | 1326617  | 3.88   | 38791  |
| 4 | W2489 ChB 220nm   | 21.518               | 1194017  | 3.49   | 33526  |

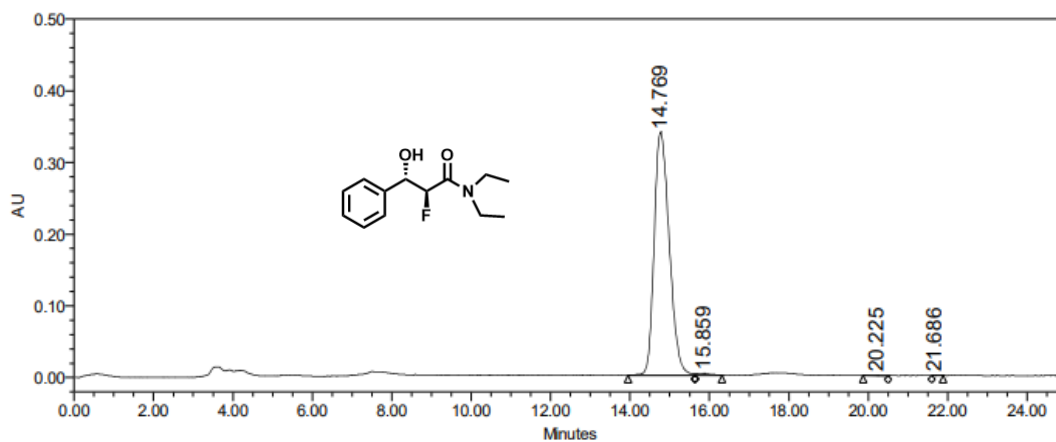

Channel: W2489 ChB; Processed Channel: W2489 ChB 220nm; Result Id: 4406; Processing Method: dyian

**Processed Channel: W2489 ChB 220nm**

|   | Processed Channel | Retention Time (min) | Area    | % Area | Height |
|---|-------------------|----------------------|---------|--------|--------|
| 1 | W2489 ChB 220nm   | 14.769               | 8962886 | 99.13  | 339034 |
| 2 | W2489 ChB 220nm   | 15.859               | 66385   | 0.73   | 2615   |
| 3 | W2489 ChB 220nm   | 20.225               | 9650    | 0.11   | 425    |
| 4 | W2489 ChB 220nm   | 21.686               | 2870    | 0.03   | 345    |

**(2S,3S)-2-fluoro-3-hydroxy-N,N-diisopropyl-3-phenylpropanamide (2p):**

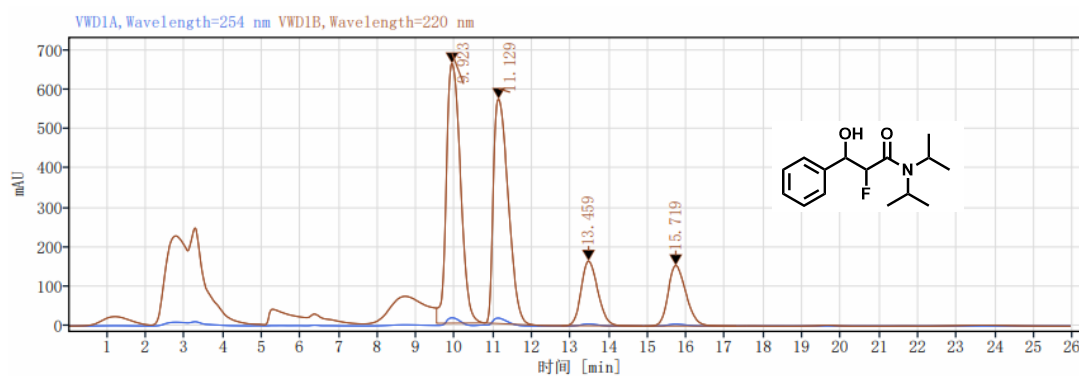

信号: VWD1B, Wavelength=220 nm

| 保留时间 [min] | 类型 | 峰宽 [min] | 峰面积             | 峰高     | 峰面积%  | 名称 |
|------------|----|----------|-----------------|--------|-------|----|
| 9.923      | VB | 1.24     | 16802.98        | 658.83 | 40.03 |    |
| 11.129     | BB | 1.42     | 15305.92        | 569.66 | 36.47 |    |
| 13.459     | BB | 2.09     | 4930.68         | 164.17 | 11.75 |    |
| 15.719     | BB | 2.37     | 4933.61         | 153.36 | 11.75 |    |
| <b>总和</b>  |    |          | <b>41973.20</b> |        |       |    |

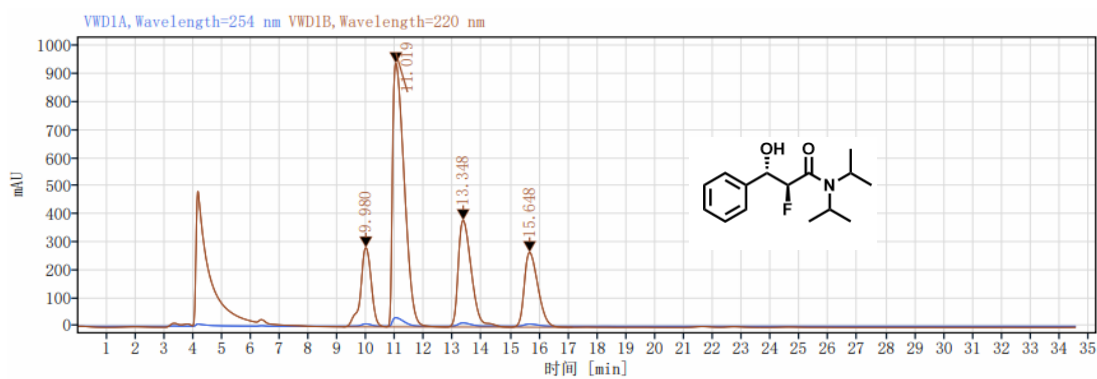

信号: VWD1B, Wavelength=220 nm

| 保留时间 [min] | 类型 | 峰宽 [min] | 峰面积             | 峰高     | 峰面积%  | 名称 |
|------------|----|----------|-----------------|--------|-------|----|
| 9.980      | BV | 1.52     | 7337.07         | 282.65 | 13.40 |    |
| 11.019     | VB | 2.06     | 26557.42        | 941.23 | 48.50 |    |
| 13.348     | BB | 2.21     | 12069.30        | 380.81 | 22.04 |    |
| 15.648     | BB | 2.16     | 8793.93         | 267.09 | 16.06 |    |
| <b>总和</b>  |    |          | <b>54757.72</b> |        |       |    |



**(2*S*,3*S*)-2-fluoro-3-hydroxy-3-phenyl-1-(pyrrolidin-1-yl)propan-1-one (2q):**

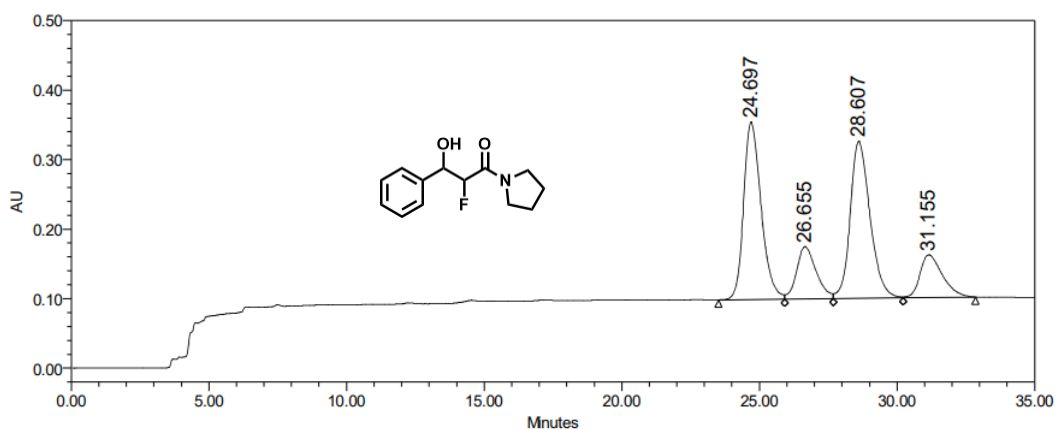

Channel: W2489 ChB; Processed Channel: W2489 ChB 220nm; Result Id: 4127; Processing Method: BL XXT

**Processed Channel: W2489 ChB 220nm**

|   | Processed Channel | Retention Time (min) | Area     | % Area | Height |
|---|-------------------|----------------------|----------|--------|--------|
| 1 | W2489 ChB 220nm   | 24.697               | 11266606 | 37.90  | 255399 |
| 2 | W2489 ChB 220nm   | 26.655               | 3695795  | 12.43  | 74939  |
| 3 | W2489 ChB 220nm   | 28.607               | 11300115 | 38.01  | 225950 |
| 4 | W2489 ChB 220nm   | 31.155               | 3467600  | 11.66  | 61289  |

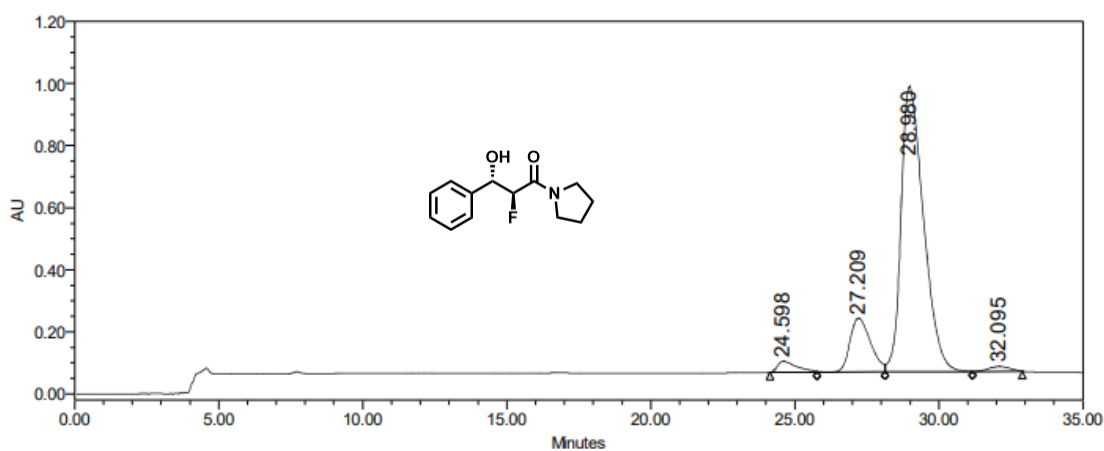

Channel: W2489 ChB; Processed Channel: W2489 ChB 220nm; Result Id: 4124; Processing Method: BL

**Processed Channel: W2489 ChB 220nm**

|   | Processed Channel | Retention Time (min) | Area     | % Area | Height |
|---|-------------------|----------------------|----------|--------|--------|
| 1 | W2489 ChB 220nm   | 24.598               | 1667319  | 2.74   | 35369  |
| 2 | W2489 ChB 220nm   | 27.209               | 8592828  | 14.10  | 173165 |
| 3 | W2489 ChB 220nm   | 28.980               | 49853205 | 81.83  | 918659 |
| 4 | W2489 ChB 220nm   | 32.095               | 808686   | 1.33   | 15733  |

**(2*S*,3*S*)-2-fluoro-3-hydroxy-*N*-methyl-3-phenylpropanamide (2r):**

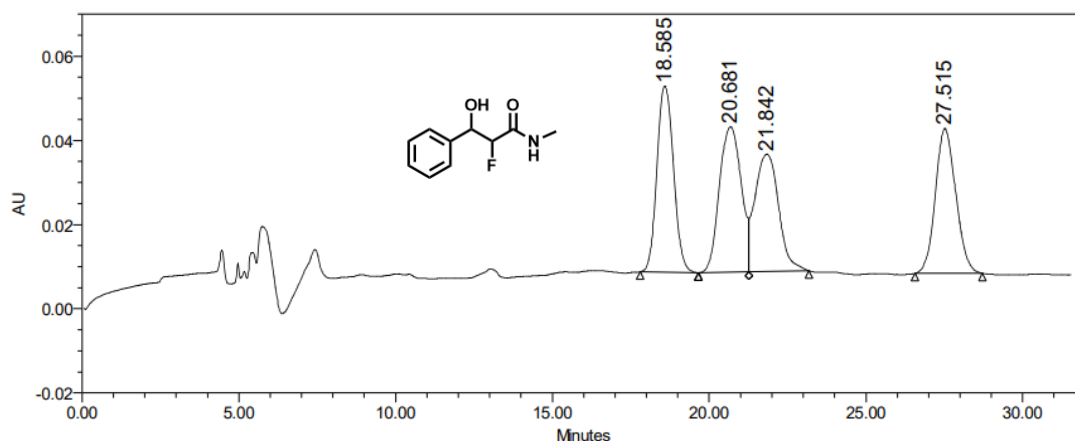

Channel: W2489 ChB; Processed Channel: W2489 ChB 220nm; Result Id: 3985; Processing Method: Nh xxt

**Processed Channel: W2489 ChB 220nm**

|   | Processed Channel | Retention Time (min) | Area    | % Area | Height |
|---|-------------------|----------------------|---------|--------|--------|
| 1 | W2489 ChB 220nm   | 18.585               | 1627259 | 25.67  | 44160  |
| 2 | W2489 ChB 220nm   | 20.681               | 1678025 | 26.47  | 34498  |
| 3 | W2489 ChB 220nm   | 21.842               | 1472033 | 23.22  | 27860  |
| 4 | W2489 ChB 220nm   | 27.515               | 1562249 | 24.64  | 34397  |

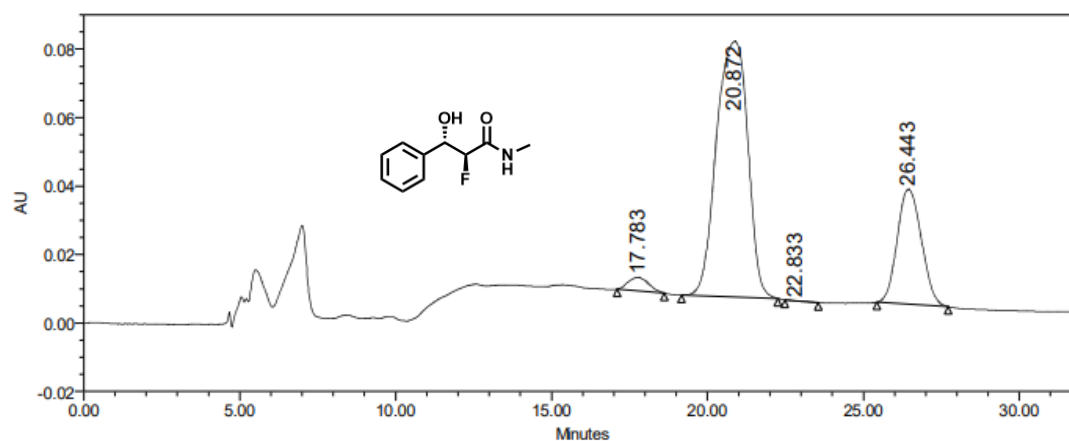

Channel: W2489 ChB; Processed Channel: W2489 ChB 220nm; Result Id: 3982; Processing Method: NH

**Processed Channel: W2489 ChB 220nm**

|   | Processed Channel | Retention Time (min) | Area    | % Area | Height |
|---|-------------------|----------------------|---------|--------|--------|
| 1 | W2489 ChB 220nm   | 17.783               | 179843  | 2.49   | 3920   |
| 2 | W2489 ChB 220nm   | 20.872               | 5227732 | 72.37  | 74667  |
| 3 | W2489 ChB 220nm   | 22.833               | 1512    | 0.02   | -51    |
| 4 | W2489 ChB 220nm   | 26.443               | 1814629 | 25.12  | 33552  |

**(2*S*,3*S*)-2-fluoro-3-hydroxy-3-phenyl-N-propylpropanamide (2s):**

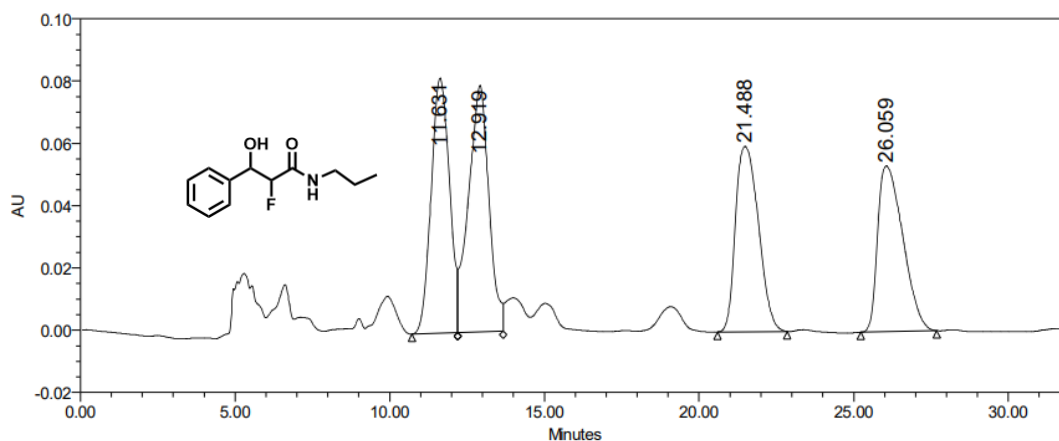

Channel: W2489 ChB; Processed Channel: W2489 ChB 220nm; Result Id: 3959; Processing Method: Nw xxt

**Processed Channel: W2489 ChB 220nm**

|   | Processed Channel | Retention Time (min) | Area    | % Area | Height |
|---|-------------------|----------------------|---------|--------|--------|
| 1 | W2489 ChB 220nm   | 11.631               | 3377685 | 25.74  | 81872  |
| 2 | W2489 ChB 220nm   | 12.919               | 3642103 | 27.76  | 79055  |
| 3 | W2489 ChB 220nm   | 21.488               | 3079857 | 23.47  | 59512  |
| 4 | W2489 ChB 220nm   | 26.059               | 3022102 | 23.03  | 53238  |

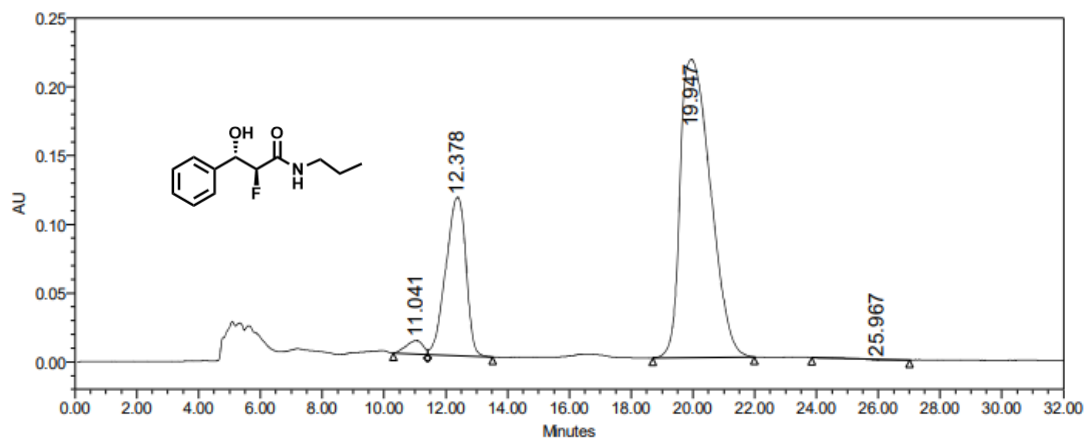

Channel: W2489 ChB; Processed Channel: W2489 ChB 220nm; Result Id: 3989; Processing Method: NW

**Processed Channel: W2489 ChB 220nm**

|   | Processed Channel | Retention Time (min) | Area     | % Area | Height |
|---|-------------------|----------------------|----------|--------|--------|
| 1 | W2489 ChB 220nm   | 11.041               | 369206   | 1.81   | 9592   |
| 2 | W2489 ChB 220nm   | 12.378               | 5219296  | 25.54  | 115048 |
| 3 | W2489 ChB 220nm   | 19.947               | 14795885 | 72.41  | 216717 |
| 4 | W2489 ChB 220nm   | 25.967               | 47807    | 0.23   | -643   |

**(2*S*,3*S*)-2-fluoro-3-hydroxy-*N*-isopropyl-3-phenylpropanamide (2t):**

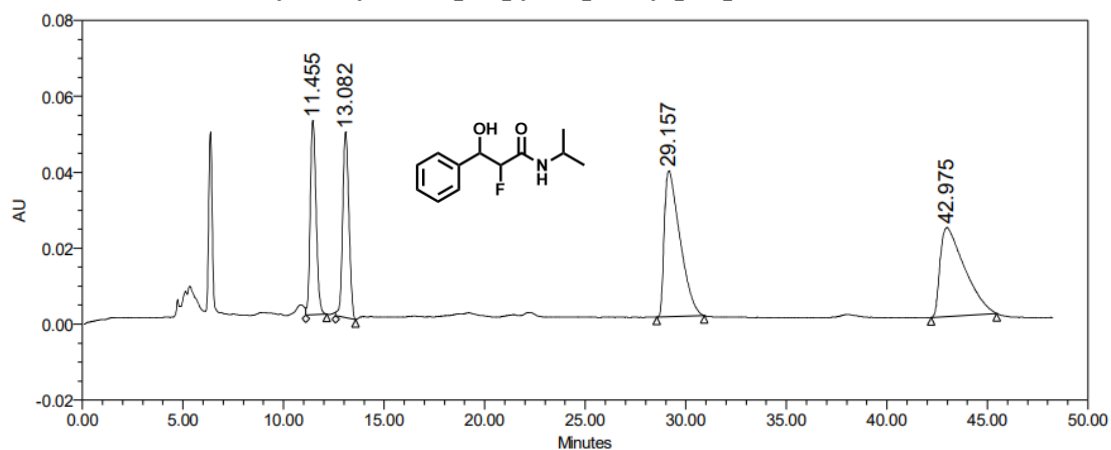

Channel: W2489 ChB; Processed Channel: W2489 ChB 220nm; Result Id: 4371; Processing Method: ipr NH xxt

**Processed Channel: W2489 ChB 220nm**

|   | Processed Channel | Retention Time (min) | Area    | % Area | Height |
|---|-------------------|----------------------|---------|--------|--------|
| 1 | W2489 ChB 220nm   | 11.455               | 1031801 | 16.80  | 51129  |
| 2 | W2489 ChB 220nm   | 13.082               | 1047952 | 17.06  | 48824  |
| 3 | W2489 ChB 220nm   | 29.157               | 2085376 | 33.95  | 38420  |
| 4 | W2489 ChB 220nm   | 42.975               | 1976625 | 32.18  | 23410  |

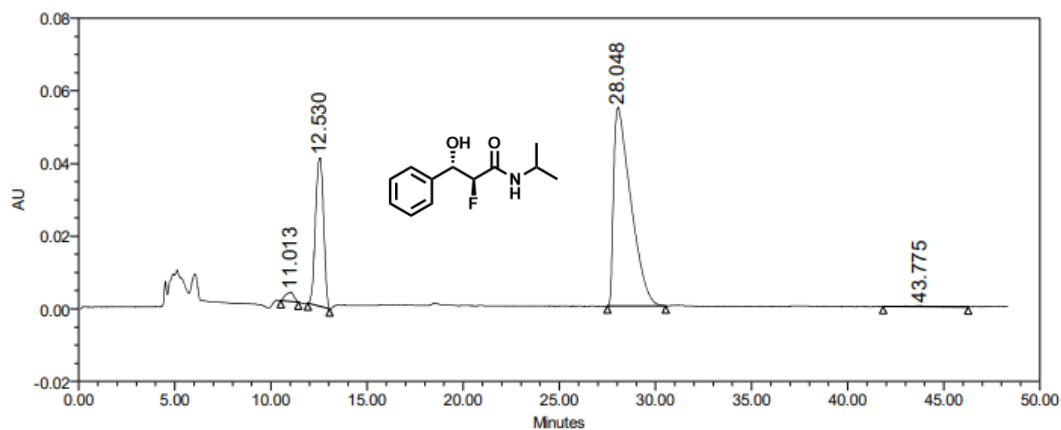

Channel: W2489 ChB; Processed Channel: W2489 ChB 220nm; Result Id: 4376; Processing Method: ipr NH

**Processed Channel: W2489 ChB 220nm**

|   | Processed Channel | Retention Time (min) | Area    | % Area | Height |
|---|-------------------|----------------------|---------|--------|--------|
| 1 | W2489 ChB 220nm   | 11.013               | 74935   | 1.61   | 2414   |
| 2 | W2489 ChB 220nm   | 12.530               | 1192777 | 25.56  | 40698  |
| 3 | W2489 ChB 220nm   | 28.048               | 3383962 | 72.51  | 54505  |
| 4 | W2489 ChB 220nm   | 43.775               | 15238   | 0.33   | 194    |

## (2S,3S)-N-(tert-butyl)-2-fluoro-3-phenylpropanamide (2u):

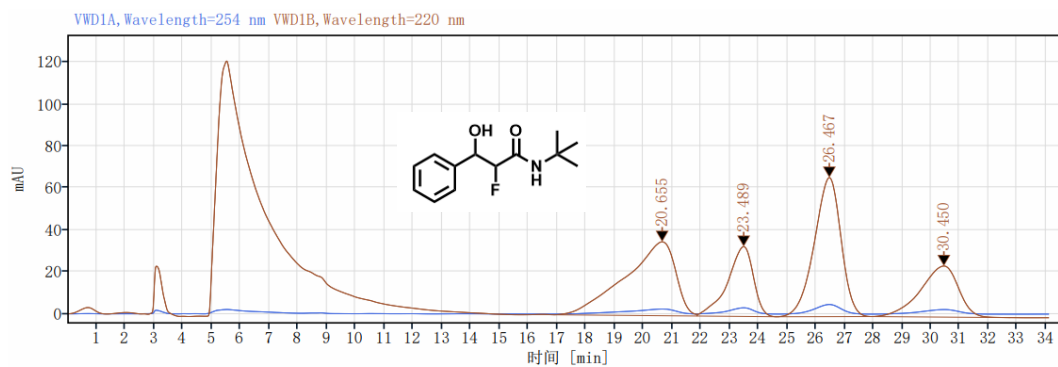

信号: VWD1B, Wavelength=220 nm

| 保留时间 [min] | 类型   | 峰宽 [min] | 峰面积      | 峰高    | 峰面积%  | 名称 |
|------------|------|----------|----------|-------|-------|----|
| 20.655     | BV   | 4.99     | 4278.76  | 35.29 | 33.19 |    |
| 23.489     | VB   | 2.76     | 2081.72  | 33.34 | 16.15 |    |
| 26.467     | BB   | 3.30     | 4289.58  | 66.37 | 33.27 |    |
| 30.450     | MM m | 4.82     | 2242.65  | 24.39 | 17.39 |    |
| 总和         |      |          | 12892.71 |       |       |    |

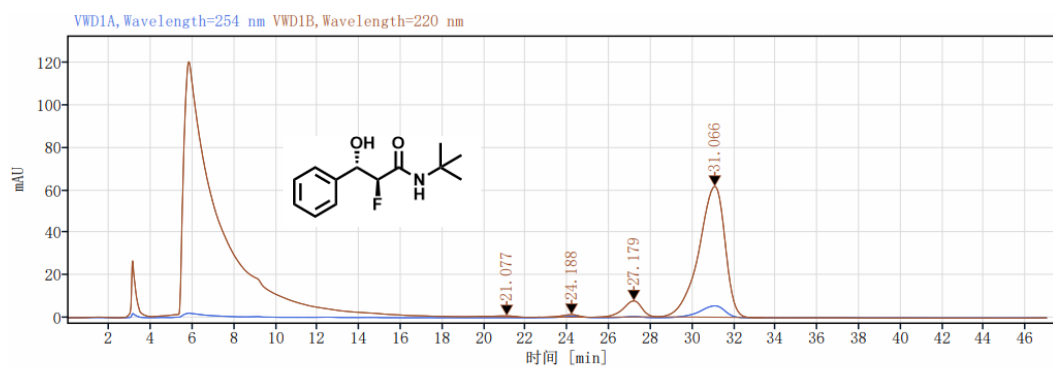

信号: VWD1B, Wavelength=220 nm

| 保留时间 [min] | 类型   | 峰宽 [min] | 峰面积     | 峰高    | 峰面积%  | 名称 |
|------------|------|----------|---------|-------|-------|----|
| 21.077     | MM m | 2.35     | 32.54   | 0.49  | 0.55  |    |
| 24.188     | MM m | 2.25     | 67.39   | 1.22  | 1.13  |    |
| 27.179     | BB   | 3.19     | 468.86  | 7.54  | 7.86  |    |
| 31.066     | MM m | 5.10     | 5395.18 | 61.70 | 90.46 |    |
| 总和         |      |          | 5963.97 |       |       |    |

**(2*S*,3*R*)-2-fluoro-3-hydroxy-*N,N*-dimethyl-3-(thiophen-2-yl)propanamide (4a):**

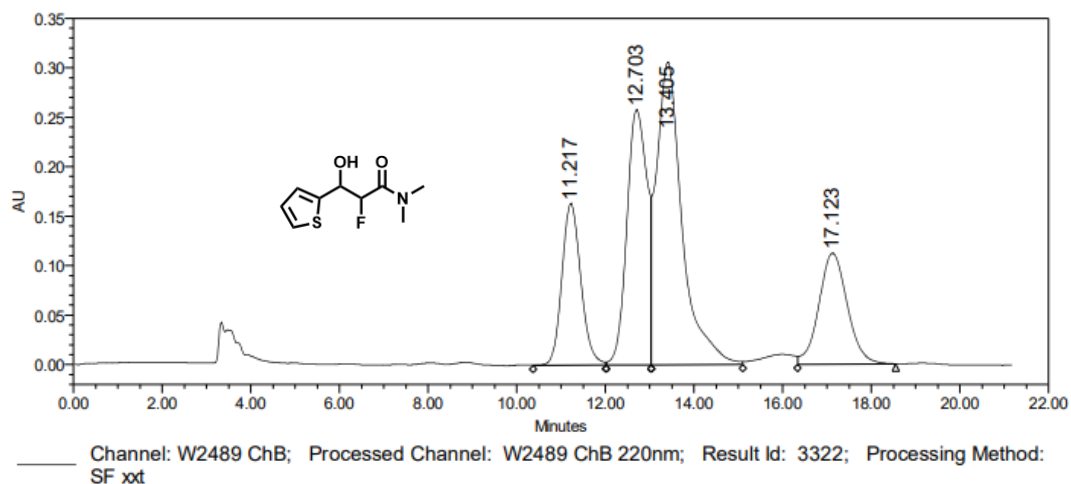

**Processed Channel: W2489 ChB 220nm**

|   | Processed Channel | Retention Time (min) | Area     | % Area | Height |
|---|-------------------|----------------------|----------|--------|--------|
| 1 | W2489 ChB 220nm   | 11.217               | 4874177  | 16.00  | 163368 |
| 2 | W2489 ChB 220nm   | 12.703               | 8181426  | 26.85  | 258046 |
| 3 | W2489 ChB 220nm   | 13.405               | 12419212 | 40.76  | 305779 |
| 4 | W2489 ChB 220nm   | 17.123               | 4994961  | 16.39  | 112192 |

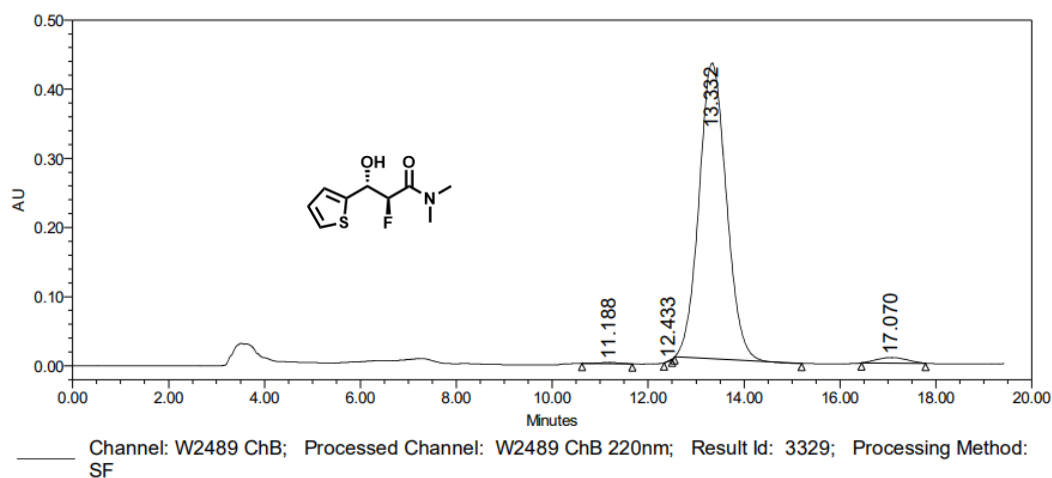

**Processed Channel: W2489 ChB 220nm**

|   | Processed Channel | Retention Time (min) | Area     | % Area | Height |
|---|-------------------|----------------------|----------|--------|--------|
| 1 | W2489 ChB 220nm   | 11.188               | 62720    | 0.36   | 1930   |
| 2 | W2489 ChB 220nm   | 12.433               | 5319     | 0.03   | -806   |
| 3 | W2489 ChB 220nm   | 13.332               | 16991502 | 97.64  | 427593 |
| 4 | W2489 ChB 220nm   | 17.070               | 341869   | 1.96   | 7820   |

**(2*S*,3*S*)-2-fluoro-3-hydroxy-*N,N*-dimethyl-3-(naphthalen-2-yl)propanamide (4b):**

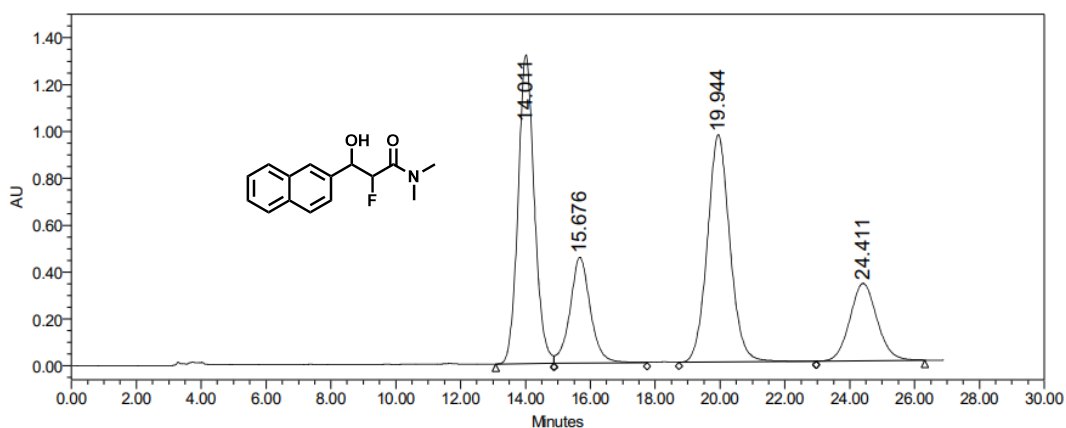

Channel: W2489 ChB; Processed Channel: W2489 ChB 220nm; Result Id: 3167; Processing Method: Nai xxt

**Processed Channel: W2489 ChB 220nm**

|   | Processed Channel | Retention Time (min) | Area     | % Area | Height  |
|---|-------------------|----------------------|----------|--------|---------|
| 1 | W2489 ChB 220nm   | 14.011               | 45799949 | 34.86  | 1316506 |
| 2 | W2489 ChB 220nm   | 15.676               | 19702823 | 15.00  | 451797  |
| 3 | W2489 ChB 220nm   | 19.944               | 46720969 | 35.56  | 968113  |
| 4 | W2489 ChB 220nm   | 24.411               | 19160128 | 14.58  | 329999  |

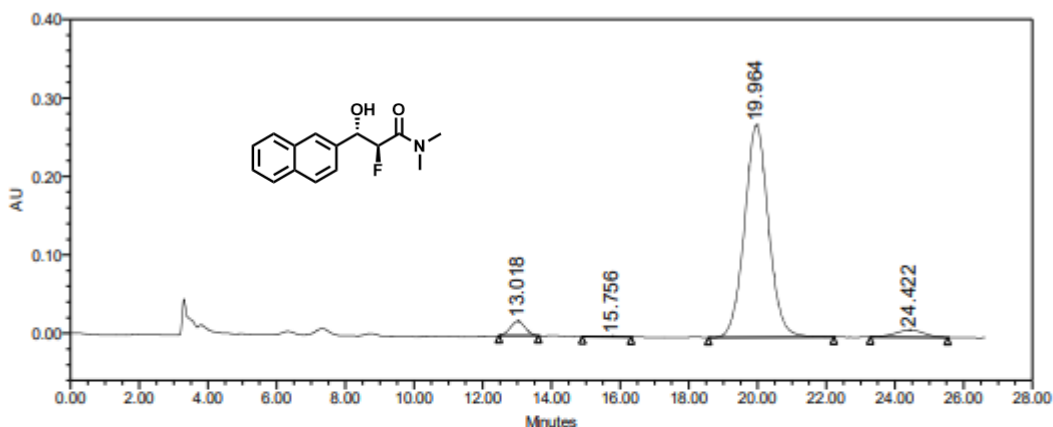

Channel: W2489 ChB; Processed Channel: W2489 ChB 220nm; Result Id: 3169; Processing Method: Nai

**Processed Channel: W2489 ChB 220nm**

|   | Processed Channel | Retention Time (min) | Area     | % Area | Height |
|---|-------------------|----------------------|----------|--------|--------|
| 1 | W2489 ChB 220nm   | 13.018               | 548631   | 3.84   | 18489  |
| 2 | W2489 ChB 220nm   | 15.756               | 34817    | 0.24   | 821    |
| 3 | W2489 ChB 220nm   | 19.964               | 13171540 | 92.21  | 270327 |
| 4 | W2489 ChB 220nm   | 24.422               | 529931   | 3.71   | 9204   |

**(2*S*,3*S*)-3-([1,1'-biphenyl]-4-yl)-2-fluoro-3-hydroxy-*N,N*-dimethylpropanamide**

**(4c):**

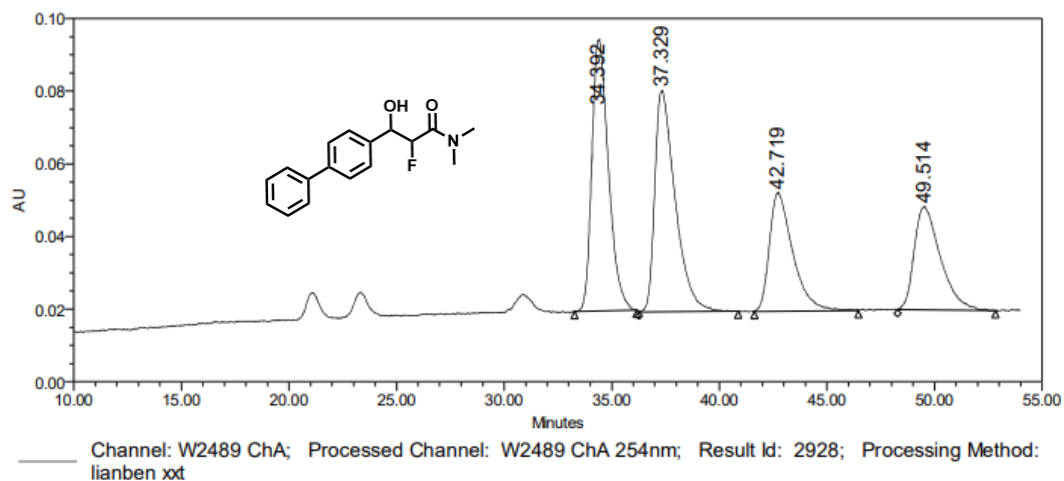

**Processed Channel: W2489 ChA 254nm**

| Processed Channel | Retention Time (min) | Area    | % Area | Height |
|-------------------|----------------------|---------|--------|--------|
| 1 W2489 ChA 254nm | 34.392               | 3990010 | 30.97  | 74758  |
| 2 W2489 ChA 254nm | 37.329               | 4019765 | 31.20  | 60845  |
| 3 W2489 ChA 254nm | 42.719               | 2457964 | 19.08  | 32617  |
| 4 W2489 ChA 254nm | 49.514               | 2415325 | 18.75  | 28411  |

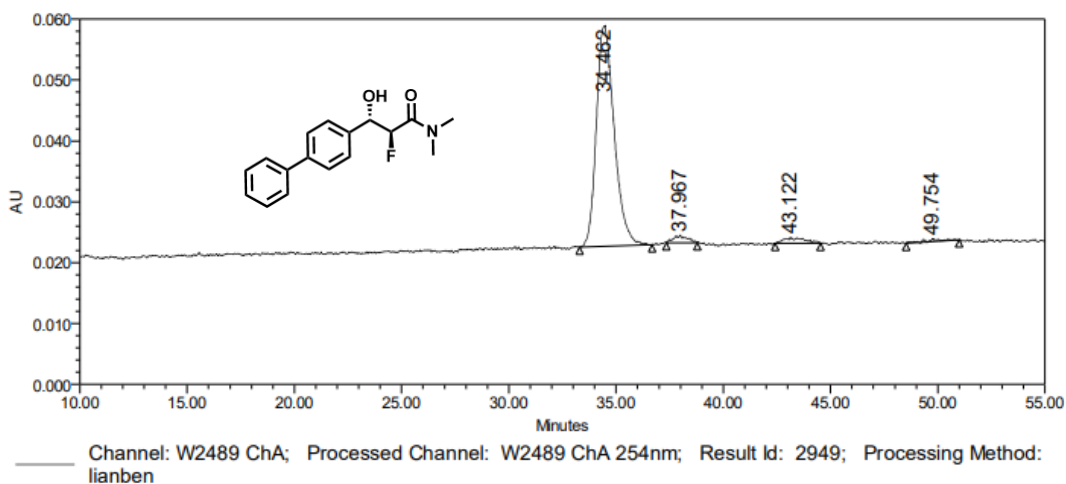

**Processed Channel: W2489 ChA 254nm**

| Processed Channel | Retention Time (min) | Area    | % Area | Height |
|-------------------|----------------------|---------|--------|--------|
| 1 W2489 ChA 254nm | 34.462               | 2098350 | 93.98  | 36282  |
| 2 W2489 ChA 254nm | 37.967               | 52220   | 2.34   | 1163   |
| 3 W2489 ChA 254nm | 43.122               | 63771   | 2.86   | 893    |
| 4 W2489 ChA 254nm | 49.754               | 18525   | 0.83   | 424    |



**(2*S*,3*S*)-3-(benzo[d][1,3]dioxol-5-yl)-2-fluoro-3-hydroxy-*N,N*-dimethylpropanami-  
-de (4d):**

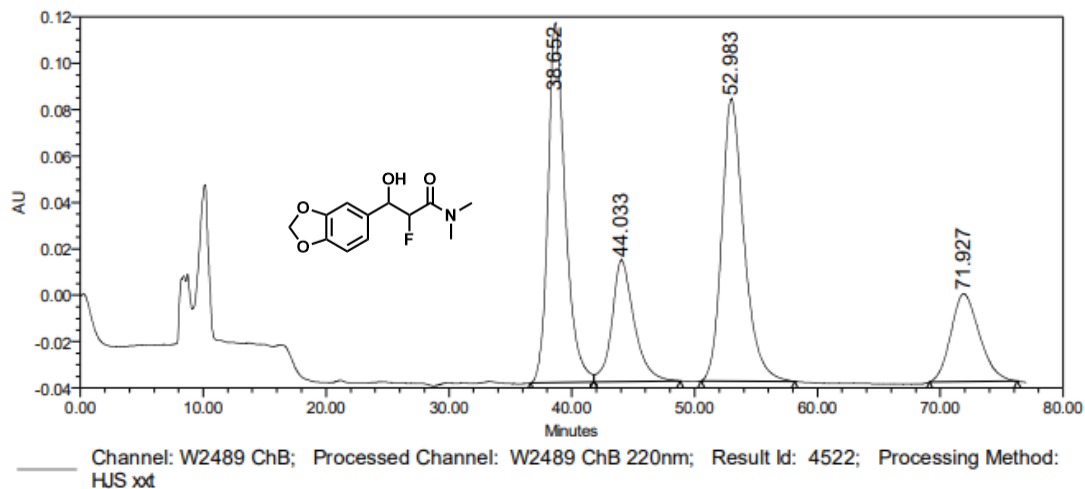

**Processed Channel: W2489 ChB 220nm**

|   | Processed Channel | Retention Time (min) | Area     | % Area | Height |
|---|-------------------|----------------------|----------|--------|--------|
| 1 | W2489 ChB 220nm   | 38.652               | 15099469 | 35.00  | 154972 |
| 2 | W2489 ChB 220nm   | 44.033               | 6579763  | 15.25  | 52436  |
| 3 | W2489 ChB 220nm   | 52.983               | 15324298 | 35.52  | 121580 |
| 4 | W2489 ChB 220nm   | 71.927               | 6133732  | 14.22  | 37840  |

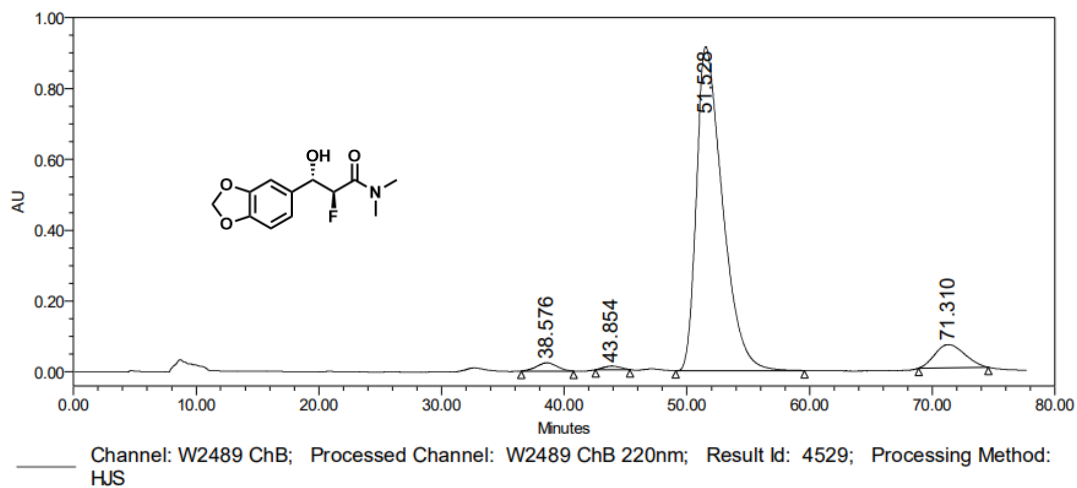

**Processed Channel: W2489 ChB 220nm**

|   | Processed Channel | Retention Time (min) | Area      | % Area | Height |
|---|-------------------|----------------------|-----------|--------|--------|
| 1 | W2489 ChB 220nm   | 38.576               | 2641836   | 1.76   | 22998  |
| 2 | W2489 ChB 220nm   | 43.854               | 951578    | 0.64   | 9972   |
| 3 | W2489 ChB 220nm   | 51.528               | 135059170 | 90.23  | 914639 |
| 4 | W2489 ChB 220nm   | 71.310               | 11037892  | 7.37   | 65522  |

**Methyl (2*S*,3*S*)-2-fluoro-3-hydroxy-3-phenylpropanoate (4e):**

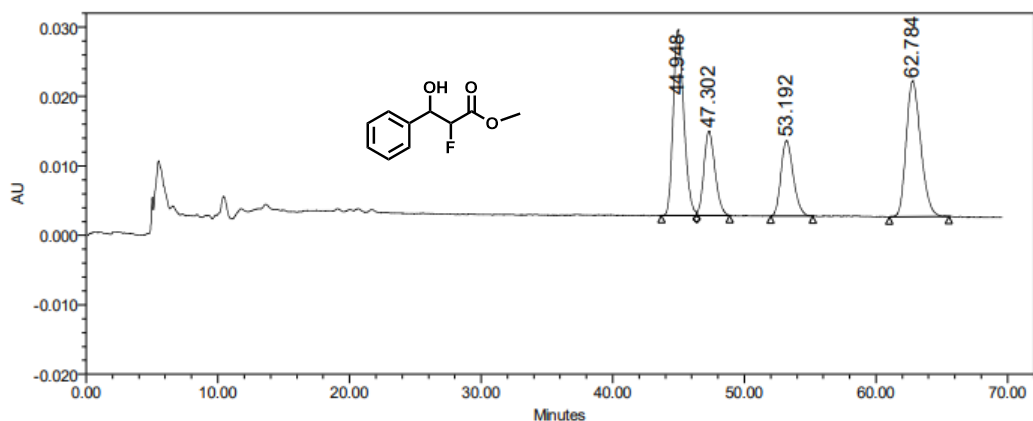

Channel: W2489 ChB; Processed Channel: W2489 ChB 220nm; Result Id: 4012; Processing Method: jiazhi xxt

**Processed Channel: W2489 ChB 220nm**

|   | Processed Channel | Retention Time (min) | Area    | % Area | Height |
|---|-------------------|----------------------|---------|--------|--------|
| 1 | W2489 ChB 220nm   | 44.948               | 1508486 | 34.10  | 26757  |
| 2 | W2489 ChB 220nm   | 47.302               | 710671  | 16.06  | 12097  |
| 3 | W2489 ChB 220nm   | 53.192               | 702770  | 15.89  | 10815  |
| 4 | W2489 ChB 220nm   | 62.784               | 1501842 | 33.95  | 19515  |

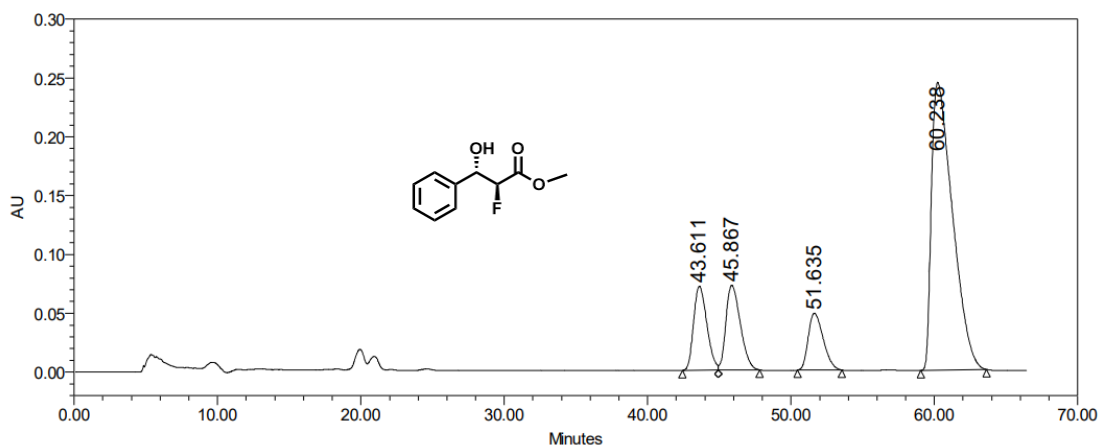

Channel: W2489 ChB; Processed Channel: W2489 ChB 220nm; Result Id: 4194; Processing Method: jiazhi

**Processed Channel: W2489 ChB 220nm**

|   | Processed Channel | Retention Time (min) | Area     | % Area | Height |
|---|-------------------|----------------------|----------|--------|--------|
| 1 | W2489 ChB 220nm   | 43.611               | 4581557  | 12.04  | 71223  |
| 2 | W2489 ChB 220nm   | 45.867               | 5030244  | 13.22  | 72018  |
| 3 | W2489 ChB 220nm   | 51.635               | 3504715  | 9.21   | 48241  |
| 4 | W2489 ChB 220nm   | 60.238               | 24941816 | 65.54  | 244484 |

### Ethyl (2S,3S)-2-fluoro-3-hydroxy-3-phenylpropanoate (4f):

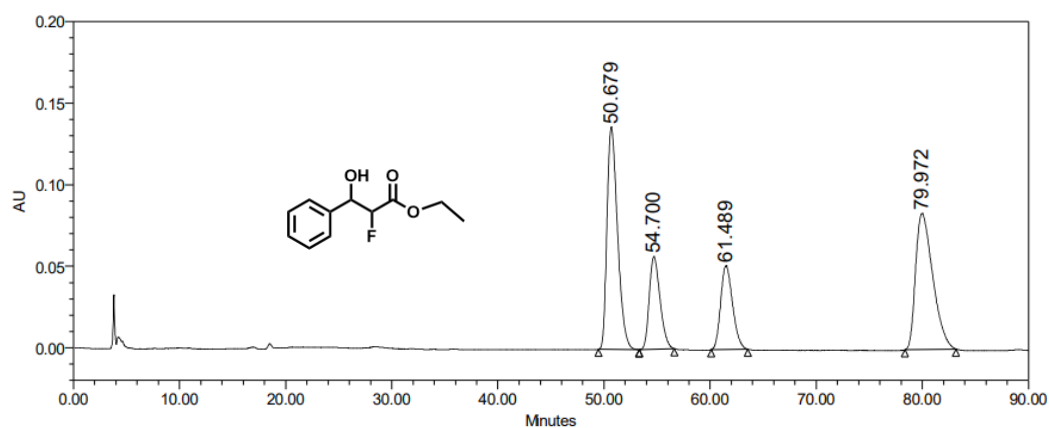

Channel: W2489 ChA; Processed Channel: W2489 ChA 210nm; Result Id: 3753; Processing Method: yizhi xxt

#### Processed Channel: W2489 ChA 210nm

|   | Processed Channel | Retention Time (min) | Area    | % Area | Height |
|---|-------------------|----------------------|---------|--------|--------|
| 1 | W2489 ChA 210nm   | 50.679               | 9418222 | 35.09  | 136298 |
| 2 | W2489 ChA 210nm   | 54.700               | 4024965 | 15.00  | 56739  |
| 3 | W2489 ChA 210nm   | 61.489               | 4012276 | 14.95  | 51336  |
| 4 | W2489 ChA 210nm   | 79.972               | 9381467 | 34.96  | 83402  |

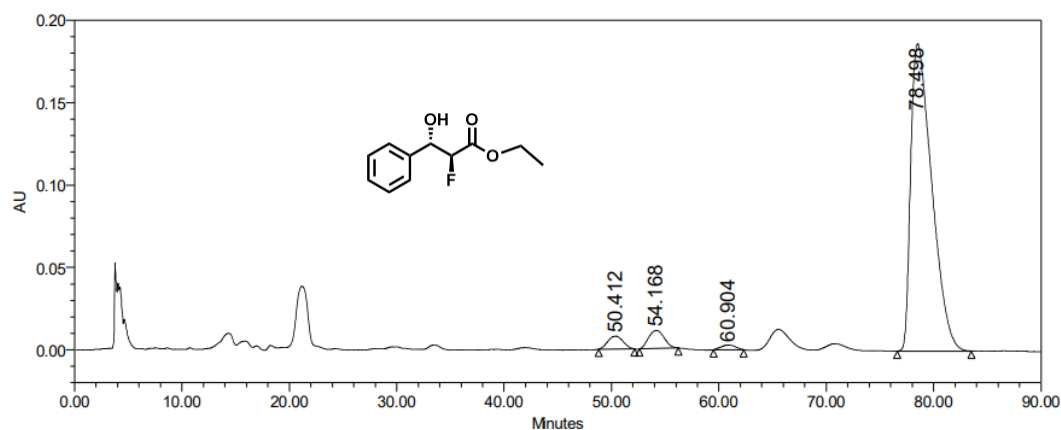

Channel: W2489 ChA; Processed Channel: W2489 ChA 210nm; Result Id: 3750; Processing Method: yizhi 40 1

#### Processed Channel: W2489 ChA 210nm

|   | Processed Channel | Retention Time (min) | Area     | % Area | Height |
|---|-------------------|----------------------|----------|--------|--------|
| 1 | W2489 ChA 210nm   | 50.412               | 775262   | 2.82   | 7849   |
| 2 | W2489 ChA 210nm   | 54.168               | 1106833  | 4.03   | 10935  |
| 3 | W2489 ChA 210nm   | 60.904               | 258454   | 0.94   | 2796   |
| 4 | W2489 ChA 210nm   | 78.498               | 25342505 | 92.21  | 186296 |

**(3R,5R,7R)-adamantan-1-yl(2S,3S)-2-fluoro-3-hydroxy-3-phenylpropanoate (4g):**

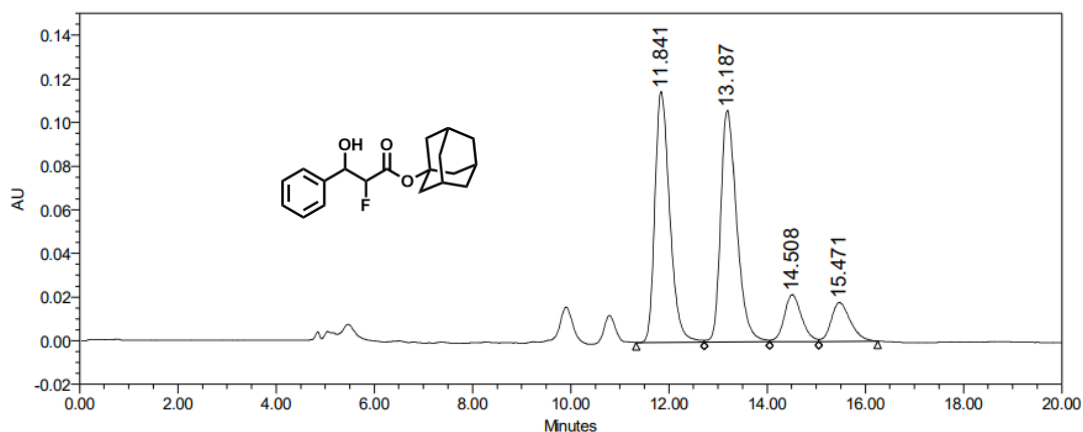

Channel: W2489 ChB; Processed Channel: W2489 ChB 220nm; Result Id: 4181; Processing Method: jingangwan xxt

**Processed Channel: W2489 ChB 220nm**

|   | Processed Channel | Retention Time (min) | Area    | % Area | Height |
|---|-------------------|----------------------|---------|--------|--------|
| 1 | W2489 ChB 220nm   | 11.841               | 2411639 | 41.36  | 114962 |
| 2 | W2489 ChB 220nm   | 13.187               | 2410408 | 41.34  | 106222 |
| 3 | W2489 ChB 220nm   | 14.508               | 526747  | 9.03   | 21426  |
| 4 | W2489 ChB 220nm   | 15.471               | 481410  | 8.26   | 17788  |

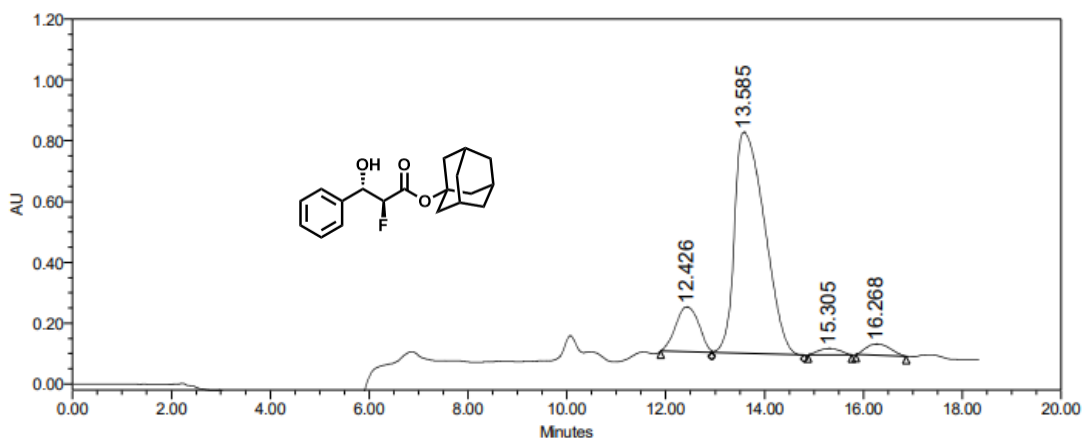

Channel: W2489 ChB; Processed Channel: W2489 ChB 220nm; Result Id: 4184; Processing Method: jingangwan

**Processed Channel: W2489 ChB 220nm**

|   | Processed Channel | Retention Time (min) | Area     | % Area | Height |
|---|-------------------|----------------------|----------|--------|--------|
| 1 | W2489 ChB 220nm   | 12.426               | 4818606  | 12.84  | 147625 |
| 2 | W2489 ChB 220nm   | 13.585               | 30824425 | 82.15  | 727374 |
| 3 | W2489 ChB 220nm   | 15.305               | 624018   | 1.66   | 20169  |
| 4 | W2489 ChB 220nm   | 16.268               | 1254777  | 3.34   | 36306  |

**(1*S*,2*R*)-2-fluoro-1-phenyl-2-(phenylsulfonyl)ethan-1-ol (4h):**

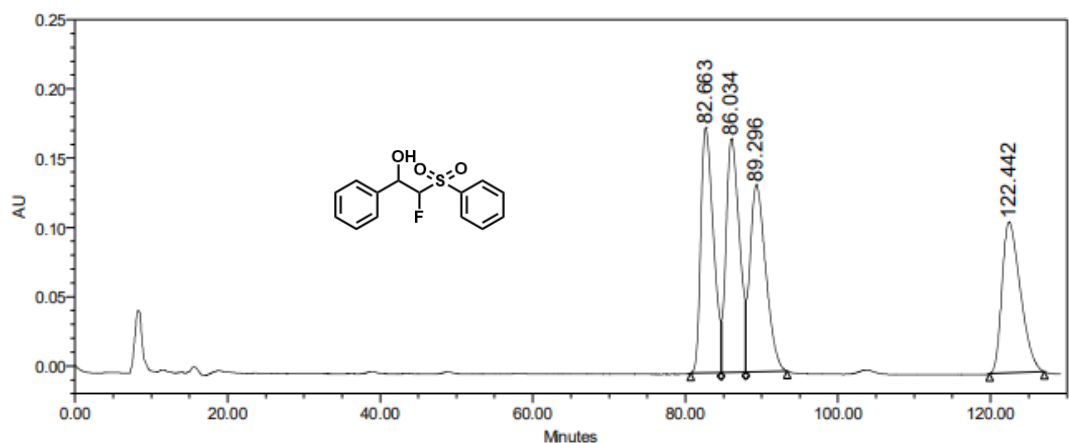

Channel: W2489 ChB; Processed Channel: W2489 ChB 220nm; Result Id: 4381; Processing Method: LFxt

**Processed Channel: W2489 ChB 220nm**

|   | Processed Channel | Retention Time (min) | Area     | % Area | Height |
|---|-------------------|----------------------|----------|--------|--------|
| 1 | W2489 ChB 220nm   | 82.663               | 20154174 | 25.63  | 176932 |
| 2 | W2489 ChB 220nm   | 86.034               | 20601145 | 26.20  | 168371 |
| 3 | W2489 ChB 220nm   | 89.296               | 19575895 | 24.89  | 134760 |
| 4 | W2489 ChB 220nm   | 122.442              | 18307821 | 23.28  | 108887 |

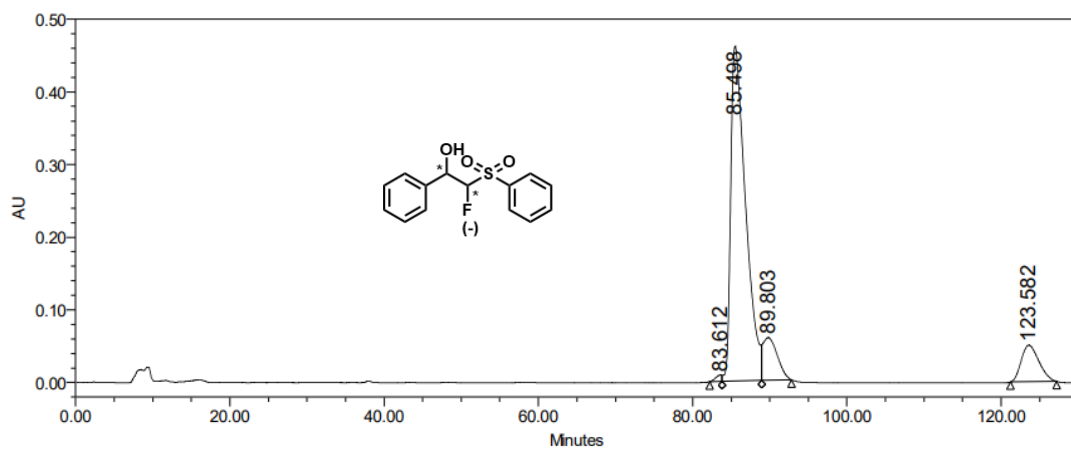

Channel: W2489 ChB; Processed Channel: W2489 ChB 220nm; Result Id: 4383; Processing Method: LF

**Processed Channel: W2489 ChB 220nm**

|   | Processed Channel | Retention Time (min) | Area     | % Area | Height |
|---|-------------------|----------------------|----------|--------|--------|
| 1 | W2489 ChB 220nm   | 83.612               | 477102   | 0.61   | 8776   |
| 2 | W2489 ChB 220nm   | 85.498               | 61612871 | 79.31  | 460573 |
| 3 | W2489 ChB 220nm   | 89.803               | 7616792  | 9.81   | 58569  |
| 4 | W2489 ChB 220nm   | 123.582              | 7975354  | 10.27  | 50173  |

**(1*S*,2*S*)-2-fluoro-1-phenylpropane-1,3-diol (5a):**

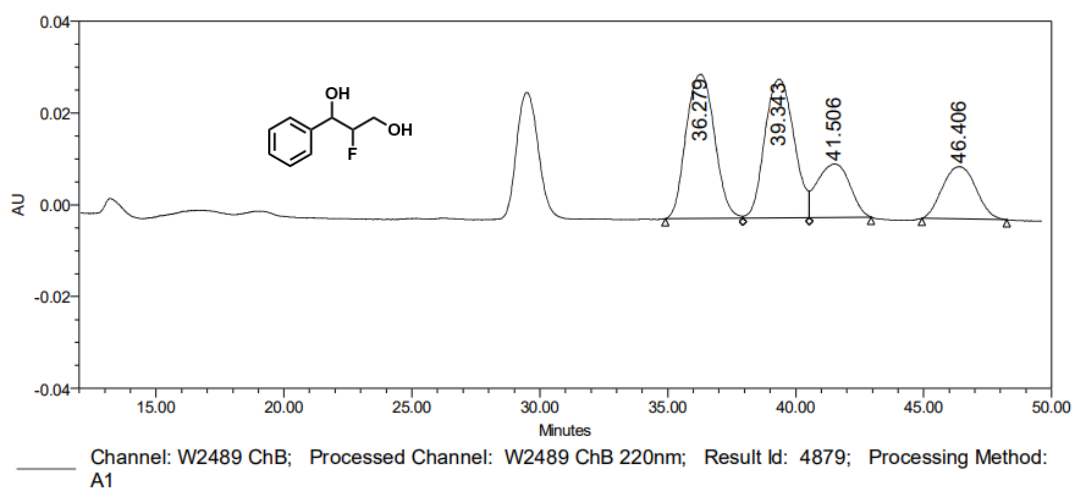

**Processed Channel: W2489 ChB 220nm**

|   | Processed Channel | Retention Time (min) | Area    | % Area | Height |
|---|-------------------|----------------------|---------|--------|--------|
| 1 | W2489 ChB 220nm   | 36.279               | 2421167 | 35.14  | 31376  |
| 2 | W2489 ChB 220nm   | 39.343               | 2399890 | 34.83  | 30205  |
| 3 | W2489 ChB 220nm   | 41.506               | 1028754 | 14.93  | 11613  |
| 4 | W2489 ChB 220nm   | 46.406               | 1040927 | 15.11  | 11392  |

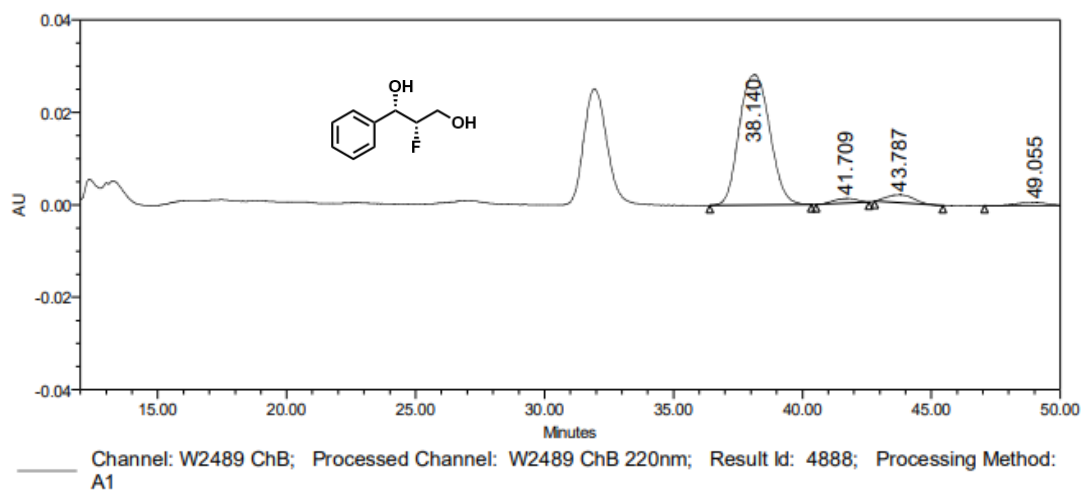

**Processed Channel: W2489 ChB 220nm**

|   | Processed Channel | Retention Time (min) | Area    | % Area | Height |
|---|-------------------|----------------------|---------|--------|--------|
| 1 | W2489 ChB 220nm   | 38.140               | 2319719 | 90.40  | 28170  |
| 2 | W2489 ChB 220nm   | 41.709               | 63610   | 2.48   | 993    |
| 3 | W2489 ChB 220nm   | 43.787               | 125867  | 4.91   | 1734   |
| 4 | W2489 ChB 220nm   | 49.055               | 56829   | 2.21   | 631    |

**(S)-(R)-1-methylaziridin-2-yl(phenyl)methanol (5b):**

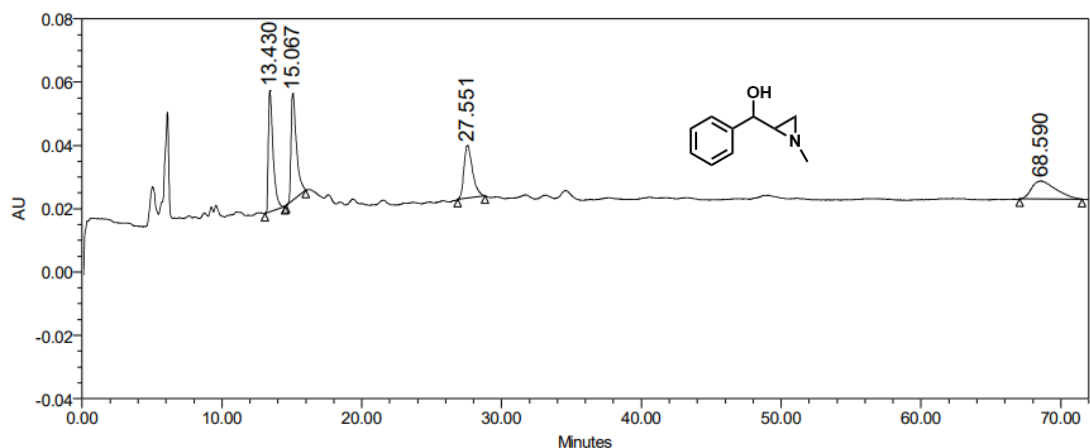

Channel: W2489 ChB; Processed Channel: W2489 ChB 220nm; Result Id: 4683; Processing Method: ys xxt

**Processed Channel: W2489 ChB 220nm**

|   | Processed Channel | Retention Time (min) | Area   | % Area | Height |
|---|-------------------|----------------------|--------|--------|--------|
| 1 | W2489 ChB 220nm   | 13.430               | 895817 | 28.01  | 38317  |
| 2 | W2489 ChB 220nm   | 15.067               | 900982 | 28.18  | 33605  |
| 3 | W2489 ChB 220nm   | 27.551               | 707927 | 22.14  | 16640  |
| 4 | W2489 ChB 220nm   | 68.590               | 692950 | 21.67  | 5728   |

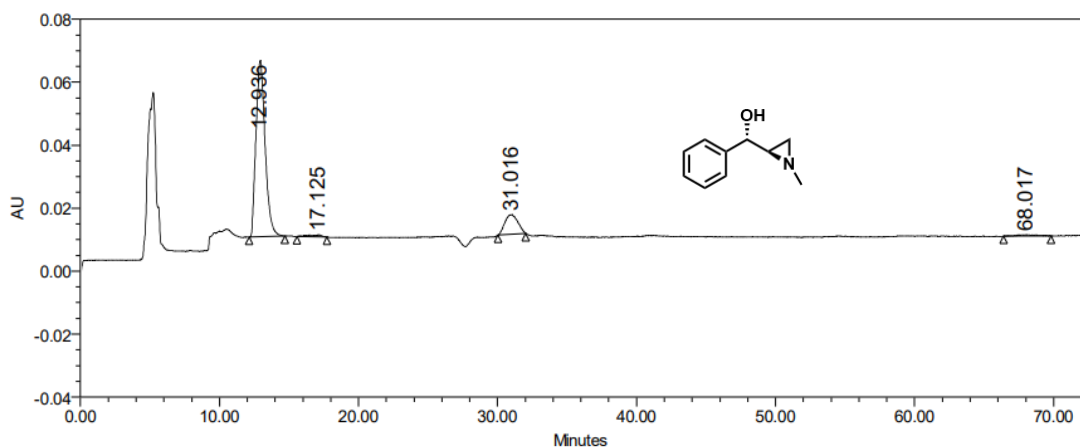

Channel: W2489 ChB; Processed Channel: W2489 ChB 220nm; Result Id: 4686; Processing Method: ys1

**Processed Channel: W2489 ChB 220nm**

|   | Processed Channel | Retention Time (min) | Area    | % Area | Height |
|---|-------------------|----------------------|---------|--------|--------|
| 1 | W2489 ChB 220nm   | 12.936               | 2557374 | 84.06  | 55947  |
| 2 | W2489 ChB 220nm   | 17.125               | 44737   | 1.47   | 610    |
| 3 | W2489 ChB 220nm   | 31.016               | 403087  | 13.25  | 6188   |
| 4 | W2489 ChB 220nm   | 68.017               | 37257   | 1.22   | 376    |
